# 1 **Complex responses of global insect pests to climate change**

2

3 Philipp Lehmann<sup>1,2,4\*</sup>, Tea Ammunét<sup>3†</sup>, Madeleine Barton<sup>4†</sup>, Andrea Battisti<sup>5†</sup>, Sanford

4 D. Eigenbrode<sup>6†</sup>, Jane Uhd Jepsen<sup>7†</sup>, Gregor Kalinkat<sup>8†</sup>, Seppo Neuvonen<sup>9†</sup>, Pekka

5 Niemelä<sup>10†</sup>, Bjørn Økland<sup>11†</sup>, John S. Terblanche<sup>4†</sup>, Christer Björkman<sup>3</sup>

6

7 <sup>1</sup>Department of Zoology, Stockholm University, Sweden. <sup>2</sup>Centre of Excellence in

8 Biological Interactions Research, Department of Biological and Environmental Science,

9 University of Jyväskylä, Finland. <sup>3</sup>Department of Ecology, Swedish University of

10 Agricultural Sciences, Sweden. <sup>4</sup>Centre for Invasion Biology, Department of

11 Conservation Ecology and Entomology, Stellenbosch University, South Africa.

12 <sup>5</sup>Department of Agronomy, Food, Natural Resources, Animals and the Environment,

13 University of Padova, Italy. <sup>6</sup>Department of Plant, Soil and Entomological Sciences,

14 University of Idaho, United States of America. <sup>7</sup>Department of Arctic Ecology,

15 Norwegian Institute for Nature Research, Norway. <sup>8</sup>Department of Biology and Ecology

16 of Fishes, Leibniz-Institute of Freshwater Ecology and Inland Fisheries, Germany.

17 <sup>9</sup>Natural Resources Institute Finland, Finland. <sup>10</sup>Biodiversity Unit, University of Turku,

18 Finland. <sup>11</sup>Norwegian Institute of Bioeconomy Research, Norway.

19

20 \*Corresponding author: Philipp Lehmann, [philipp.lehmann@zoologi.su.se](mailto:philipp.lehmann@zoologi.su.se)

21 †Contributing authors listed alphabetically.

22 **Abstract**

23 Phytophagous insect pests strongly affect the productivity and profitability of agriculture  
24 and forestry. Despite the well-known sensitivity of insects to abiotic effects such as  
25 temperature, their potential responses to ongoing climate change remain unclear. Here  
26 we compile and review documented climate change responses of 31 of the globally  
27 most severe insect pests of agriculture and forestry, focussing on species for which  
28 long-term, high-quality data are available. Most of the selected species show at least  
29 one response affecting their severity as pests, including changes in geographic range,  
30 population dynamics, life-history traits, and/or trophic interactions. The agricultural pests  
31 show strikingly more diverse and generally weaker responses to climate change than  
32 the forestry pests. However, the agricultural pests seem to increase more in detrimental  
33 ecological impact than do the forestry pests. Unexpectedly, 59% of the species show  
34 responses of reduced potential impacts as pests under ongoing climate change. This  
35 reduction in impact is further supported by a thermal sensitivity analysis showing little  
36 benefit of climate warming in relation to the optimal developmental temperatures for the  
37 majority of these pests under both current climate and future projections. The  
38 documented variation in responses indicates that efforts to mitigate undesirable climate  
39 change effects must target individual species, taking into account the complex  
40 ecological and evolutionary mechanisms underlying their responses.

41

42 **Keywords:** climate adaptation, abiotic stress, integrated pest management, agricultural  
43 pest, forestry pest

44

45 **Significance statement**

46 Here we show that 31 global insect pests in agriculture and forestry have responded to  
47 climate change in ways that both increase and decrease their socioeconomic and/or  
48 ecological impact. Most pests have responded in more than one major biological trait  
49 and furthermore the type and/or direction of responses differ regionally. The agricultural  
50 pests show more diverse and generally weaker responses to climate change than the  
51 forestry pests. Together these data show the same large variability in responses also  
52 documented in non-pest insects, and highlight that efforts to mitigate change effects  
53 must target individual species, taking into account the complex both ecological and  
54 evolutionary mechanisms underlying their responses.

55

56 **Climate change and insect pest impact.** Insect pests have major detrimental impacts  
57 on agricultural and forestry production<sup>1</sup> that are likely to increase with anticipated rise in  
58 demands for food<sup>2</sup>, bioenergy feedstocks and other agricultural products. For example,  
59 animal pests (mainly insects) cause estimated losses of ca. 18% of total global annual  
60 crop production<sup>3</sup>. Many forest pests, such as the gypsy moth (*Lymantria dispar*) and  
61 mountain pine beetle (*Dendroctonus ponderosae*), also have severe ecological impacts:  
62 displacing native species, causing widespread defoliation and tree mortality, disrupting  
63 ecosystem functions and diminishing biodiversity<sup>4,5</sup>. Further, managing insect pests is  
64 financially costly. For example, estimated global costs of managing only one pest  
65 species, the diamondback moth (*Plutella xylostella*), are 4-5 billion USD annually<sup>6</sup>.  
66 Moreover, many agricultural and forest insect pests are also invasive species that

67 contribute to negative ecological consequences and the costs of managing or mitigating  
68 such invasions are estimated to exceed 76.9 billion USD annually globally<sup>7</sup>.

69

70 The substantial global challenges posed by phytophagous insect pests can be  
71 exacerbated by ongoing and projected large-scale climatic changes<sup>8</sup> which could  
72 promote increases in pest populations and resulting economic losses<sup>9-11</sup>. Alternatively,  
73 pests can be constrained by their environmental niche requirements, physiological  
74 tolerances, and phenological or life-history responses to climate, leading to local  
75 population declines or extinctions as climates change<sup>12,13</sup>. Clearly, detailed knowledge  
76 of insect pests' current and likely responses to ongoing climate change is essential to  
77 counter changing risks. Widespread ecological damage through range expansions and  
78 increasing frequencies of outbreaks are increasingly reported<sup>13-16</sup>, but there is a severe  
79 deficiency in comprehensive information on insect pests' responses<sup>17-19</sup>.

80

81 **Climate change and insect pest biology.** Efforts to predict climate change impacts on  
82 insect pests are typically based on empirical studies of insect responses to geographical  
83 and temporal variation in climate<sup>20,21</sup>, mechanistic studies of insect responses to varying  
84 abiotic conditions (often in controlled laboratory environments)<sup>22</sup>, climate modelling  
85 studies<sup>23,24</sup>, or some combination of these approaches<sup>18</sup>. A common assumption in  
86 studies of pests' responses is that climate-limiting factors are constant across their  
87 geographic ranges. Thus studies typically ignore intraspecific variation, a well-known  
88 source of variability in climate responses<sup>9,21</sup>. Also, pest ranges generally span multiple  
89 environments, often including various types of managed landscapes<sup>25</sup>, forming complex

90 dynamic matrices of pest-ecosystem interactions<sup>19</sup>. Furthermore, analyses tend to  
91 consider a single response (e.g. range expansion), rather than the wide range of pests'  
92 potential responses to climate change<sup>19</sup>, which can be divided into at least four main  
93 categories that are non-mutually exclusive: changes in geographic range, life-history  
94 traits, population dynamics, and trophic interactions (Fig 1). Changes in range and  
95 particularly population dynamics are likely to be directly linked to economic damage.

96

97 To assess current empirically-based knowledge within these four categories of  
98 response to climate change, we reviewed primary literature on 31 globally detrimental  
99 insect pest species. Species were selected to cover both agricultural and forestry pests,  
100 representing various feeding guilds (Supplement 1, Fig S1), being present in various  
101 biomes and having large geographic ranges (Fig. 1). Furthermore, we only selected  
102 species that have been well studied over a long period. While this approach perhaps  
103 leads to biases in terms of geographical range and taxonomy, we feel that it is  
104 compensated by having high-quality comprehensive datasets available for the species.  
105 This is also critical for allowing an integrated assessment of all the four major response  
106 categories outlined above in each species and would not be possible otherwise. As  
107 there is a need for more information on biological mechanisms relating to past and  
108 present climate change responses in several key biological traits for single organisms<sup>17</sup>,  
109 we here provide an update on a number of such mechanisms (range expansion, life-  
110 history, population dynamics and trophic interactions) for the selected species in hopes  
111 that the data can be used for further predictive modelling. This information is presented  
112 in the form of species-specific descriptions and data tables in Supplement 2. We also

113 identify critical knowledge gaps, and highlight aspects that require further research to  
114 anticipate, mitigate and manage climate-driven changes in pest impacts.

115

116 **Insect pest responses to contemporary climate change are complex.** Of the 31  
117 insect pest species selected for the study, 29 (94%) reportedly show some response  
118 attributable to contemporary climate change (Table S1), and 28 (90%) present more  
119 than one response (Fig. 2a). Of the 29 showing some response 26 (90%), 18 (62%), 16  
120 (55%) and 4 (14%) respectively show changes in: geographic range, population  
121 dynamics, life-history (traits related to phenology and voltinism), and trophic interactions  
122 (Fig. 2b). While at least one reported response of almost all of these species is likely to  
123 increase pest severity (e.g. range expansion or increases in population density), 59%  
124 (17/29) of them also show responses likely to reduce pest severity (e.g. range  
125 contraction or decreased physiological performance), and often this reduction occurs  
126 simultaneously with other responses likely to increase severity (Fig. 2c). The most  
127 common severity-reducing responses are reduction in pest population density (13/29),  
128 followed by range contraction (6/29) (Fig. 2c).

129

130 Responses of 59% (17/29) of the pest species with reported sensitivity to contemporary  
131 climate change have also varied between different parts of their ranges. For example,  
132 the range of the Colorado potato beetle (*Leptinotarsa decemlineata*) has expanded  
133 northwards in recent decades, and its population density has increased in core  
134 European areas (Table S1). The range of the winter moth (*Operophtera brumata*) has  
135 also expanded, towards higher latitudes and more continental areas at the northern

136 European edge of its range, and its trophic interactions have changed in the boreal-  
137 tundra ecotone, where outbreaks have spread from the main host *Betula pubescens* to  
138 an alternative host (*B. nana*) above the tree-line (Table S1). Several species also show  
139 both severity-increasing and severity-reducing responses in different parts of their  
140 ranges. Notably, thermal tracking has been observed in some species (4/17), e.g.  
141 spruce budworm (*Choristoneura fumiferana*; Table S1), as their geographic range has  
142 expanded towards higher latitudes while it has retracted, or their abundance has  
143 declined, at lower latitudes. Similarly, northward range expansion of the hemlock woolly  
144 adelgid (*Adelges tsugae*) has been observed in the USA, while the economic damage it  
145 causes is decreasing in the southern part of its range due to poor heat tolerance of  
146 young nymphs during summer (Table S1).

147

148 **Disparate responses of pests of agriculture and forestry.** The main response  
149 patterns of pests of agricultural (mainly annual) and forestry (perennial) crops are  
150 similar, but there are some striking differences. Contrary to expectations based on  
151 differences in feeding or host ecology, and evolutionary constraints, pests of agricultural  
152 crops show more severity-reducing responses than pests of forest trees. To assess the  
153 potential impact of agricultural and forest pest responses to climate change, we  
154 categorized the species according to their historic and current socio-economic and  
155 ecological impacts, and effects of contemporary climate change on those impacts.  
156 Overall socio-economic and ecological impacts have reportedly increased across the  
157 geographic ranges of species that have responded to climate change<sup>11,19</sup>. More  
158 importantly, while all the considered forestry pests already have large ecological impact,

159 85% (17/20) of the agricultural pests currently have relatively low ecological impact  
160 beyond the cropping systems they infest. However, climate change might be inducing  
161 increases in the relatively low impact of some agricultural pests. For instance, the green  
162 stink bug (*Nezara viridula*) and maize stem borer (*Chilo partellus*) displace native bugs  
163 and borers, respectively, as their ranges expand (Table S1). Further, the range of the  
164 western corn rootworm (*Diabrotica virgifera virgifera*) in Europe has expanded, and it  
165 can cause large ecological damage by spreading maize chlorotic mottle virus to several  
166 natural hosts (Table S1). A potential explanation is that reductions in phenological  
167 constraints associated with climate warming (mediated for instance by increases in host  
168 growth season, or shorter and milder winters<sup>26</sup>), can increase interactions between  
169 pests in annual agricultural habitats and surrounding ecosystems<sup>27,28</sup>, thereby  
170 increasing ecological impacts. Indeed even small phenological mismatches might have  
171 large knock on effects for ecosystem function and predator prey interactions<sup>13,28</sup>.

172  
173 In addition to the fact that latitudinal differences in pest distributions might modulate  
174 climate change effects, several other mechanisms could be involved in the divergence  
175 of responses in annual and perennial systems. Unlike forestry pests, agricultural pests  
176 are generally associated with fragmented habitats<sup>29</sup> and may therefore have higher local  
177 extinction risks due to Allee effects when climate changes<sup>12</sup>. Further, while climate  
178 change can disrupt biological control by natural enemies in either annual or perennial  
179 systems<sup>30</sup>, the biological control agents frequently introduced in annual systems may  
180 have lower genetic diversity than native agents, and hence lower adaptive capacity to  
181 respond to environmental changes<sup>31</sup>. Direct effects of climate change on the



182 performance and phenology of pests have been detected in both annual and perennial  
183 systems. Since pests often persist through part of the season in a resting or dormant  
184 stage, especially at high latitudes and/or altitudes<sup>26</sup>, climate change can contribute to  
185 phenological mismatches between hosts and emergence of key life-stages<sup>13,21,27</sup>, as  
186 seen in *O. brumata* (Table S1). However, pests in annual and perennial systems might  
187 differ in general susceptibility to phenological mismatching, *inter alia* the former might  
188 be more sensitive to phenological host limitation; especially relative to bark beetles and  
189 root feeders.

190

191 **Past, present and future temperature stress on the major insect pests.** It has been  
192 argued that pests may suffer negative consequences of ongoing climate change owing  
193 to reduced thermal suitability and increasing frequency of high temperature extremes  
194 leading to population reductions<sup>32</sup>. For further exploration of this in our focal species, we  
195 assess the proximity of optimum development temperature ( $T_{opt}$ ) of the 31 pest insects  
196 compared to their ambient habitat air temperatures ( $T_{amb}$ ) (Fig. 3). Relating ambient  
197 temperature during the growing season in past, present and future climates to  $T_{opt}$   
198 shows large variability in how pests are expected to benefit from climate change owing  
199 to regional complexity. In general, warming climates are expected to be beneficial for  
200 growth and development, and indeed, in all but two cases  $T_{amb}$  closely approached  $T_{opt}$   
201 when comparing past, current, near future and future climates (Fig. 3B). This conclusion  
202 was also supported by a phylogenetically-informed regression analysis (Table S4).  
203 Further, this analysis suggested that pests at higher latitudes have greater disparity  
204 between  $T_{amb}$  and  $T_{opt}$ , indicating greater capacity to benefit from climate warming,

205 unlike more low latitude pests that are already close to  $T_{opt}$ . Low latitude species also  
206 potentially risk increasing frequency and intensity of heat stress as climate warms<sup>33</sup>, a  
207 notion receiving support in a recent analysis of the upper thermal tolerance of 15  
208 dipteran pests<sup>32</sup>.

209

210 However, examination of patterns in more species, as well as on other thermal traits,  
211 especially upper thermal limits or feeding (damage) rates, would be required to validate  
212 this hypothesis. Agricultural pests accounted for only 4% of the ca. 380 species  
213 included in the database of upper thermal limits compiled by Hoffmann et al.<sup>34</sup>,  
214 highlighting a potential information gap in the current literature. While the pests in the  
215 current data represent a wide geographic distribution (Fig. 1A), the studies on  $T_{opt}$  used  
216 here mostly reflect populations sampled in the northern hemisphere (Fig. 3C). This is a  
217 general problem found in other large-scale analyses of climate change responses, such  
218 as phenology<sup>28</sup> and insect metabolic or development rate-temperature databases<sup>35</sup>  
219 showing a need for further studies covering underrepresented locations. Finally, as air  
220 temperatures are reported in the global temperature database, there is risk of  
221 underestimation of microclimate variability<sup>33</sup> and thus the extent of potential buffering  
222 owing to three-dimensional habitat complexity of operative temperatures<sup>33,36</sup>.

223

224 **Evolutionary responses of insect pests to climate change.** Insect pests may evolve  
225 rapidly in response to contemporary climate change<sup>15,37-41</sup>. Thus, apparently sound  
226 projections of insect pest responses to climate change<sup>11</sup> may be compromised if  
227 evolutionary responses are not considered<sup>42</sup>. Indeed, rapid evolutionary effects have

228 influenced - or could influence further - projections for several of the 31 species  
229 considered here (Supplement 2). For example, disruption of phenological synchrony  
230 between *O. brumata* and oak in temperate Europe due to increasing temperatures<sup>30</sup> has  
231 been apparently restored by a hereditary change in egg hatching dates<sup>43</sup>. Also, range  
232 expansions of some of the forestry pests induced by climate change have resulted in  
233 colonization of areas with novel host tree species that have little innate resistance due  
234 to lack of co-evolution with the pests<sup>5</sup>. In contrast, the similarity of crops grown across  
235 large areas might promote co-evolution between agricultural pests and their hosts<sup>44</sup>.  
236 Links between biological invasions or range expansion events, climate change and  
237 evolutionary processes have received recent attention<sup>9,16,20,41</sup>, but there is still pressing  
238 need for further research in this field. The effects of management practices and  
239 evolution have generally been considered too much in isolation, especially in climate-  
240 change contexts<sup>17,31</sup>.

241

242 **Conclusions.** The 31 widely-distributed pest insects that seriously affect agricultural or  
243 forestry systems studied here show multiple and varying responses to climate change.  
244 By providing an up-to-date database that reviews biological responses to climate  
245 change in the selected pests (Supplement 2) we offer standardized information that can  
246 be further explored by other researchers. Although the present analyses cannot be  
247 considered absolute, complete, and without taxonomic, geographic and study intensity  
248 biases<sup>10</sup>, we nevertheless detected several overarching patterns that allow us to draw  
249 some general conclusions.

250

- 251 1. The data suggest that determining the net severity change of pests to climate  
252 change is complex since most species considered here have shown multiple  
253 responses that vary spatially<sup>23</sup>. The present study also provides evidence for mixed  
254 directionality of responses as well as potential explanations thereof based on major  
255 mechanisms. This set of complex but predictable outcomes and regional  
256 heterogeneity of responses is challenging for management but cannot be ignored as  
257 it is the emerging consensus in this and other studies<sup>11,18</sup>.
- 258 2. The current study urges caution in performing large-scale analyses only with single  
259 traits, since single pests often show mixed directionality of effects of climate change  
260 in different traits. Lacking the interactions among different traits in each pest species  
261 may easily lead to incomplete conclusions. To correct this we recommend more in-  
262 depth studies of biological mechanisms in a few representative species. For  
263 example, a recent meta-analysis shows that models integrating biological  
264 mechanisms from multiple traits significantly improve predictions of climate change  
265 impacts on global biodiversity<sup>17</sup>.
- 266 3. Mounting evidence suggests that pests and their hosts are responding not only  
267 through ecological, but also evolutionary processes to climate change<sup>16,40,41</sup>. Thus,  
268 evolutionary approaches might be under-exploited in pest management strategies<sup>31</sup>.  
269 Including evolutionary and ecological information when formulating integrated  
270 management strategies may facilitate robust intervention and control (as recently  
271 demonstrated in disease vector control programs<sup>45</sup>). Furthermore, it would be useful  
272 to pinpoint species with high evolvability in traits relevant to climate change<sup>16</sup>, or that

273 show trade-offs between traits linked to basal climatic stress resistance and  
274 plasticity<sup>41,46</sup>.

275 4. Combining data from large-scale experiments (e.g. mesocosm) and computational  
276 models may improve estimates of climate change effects<sup>18,41,47</sup>. Experiments should  
277 be designed to assess variance components with indicated importance in climate  
278 modelling studies, to identify the factors related to climate change that most strongly  
279 influence pest population growth and performance, such as for example the  
280 increased feeding efficacy of the Japanese beetle (*Popillia japonica*) on carbon  
281 dioxide-enriched soybean<sup>48</sup>. Indications that the response to climate change differ  
282 among trophic levels, translating into shifts in the relative importance of bottom-up  
283 and top-down population processes<sup>49</sup> needs to be studied further as even relatively  
284 small changes could result in large effects when multiple interactions are affected  
285 simultaneously<sup>50</sup>. Standardized experiments enable high-throughput investigation of  
286 pests (for recent example see<sup>51</sup>) and facilitate the development of watchlists or  
287 prioritization tools (such as The UK Plant Health Risk Register<sup>52</sup>) of key species that  
288 require further study. However, as the current data suggest large regional variability  
289 in pest responses to climate change, national or regional databases, while excellent  
290 locally, might offer poor insight into invasions into other regions unless coordinated  
291 or standardized efforts are attained, especially across political boundaries.

292 5. As  $T_{amb}$  is generally increasing towards  $T_{opt}$  for growth and development in these  
293 species, there is an expectation of increasing pest severity under future climate  
294 scenarios<sup>53</sup>. However, the relative benefit of increasing ambient temperatures is  
295 negligible for many of the studied pests (Fig. 3C). Indeed, since low-latitude species

296 already showed  $T_{amb}$  close to  $T_{opt}$ , as climates warm  $T_{amb}$  for these species may  
297 surpass  $T_{opt}$ , thus decreasing pest severity, under future climates<sup>32,33</sup>.  
298 6. Finally, and importantly, the patterns of regional variability and complexity described  
299 here are likely to apply to non-pest insects as well as non-insect species in addition  
300 to the 31 insect pest species assessed here. The extent of generality of responses  
301 across various taxa will be important to assess in future studies<sup>13,19,41,47</sup>.

302

303 **Methods.** Thirty-one of the socioeconomically and ecologically most detrimental insect  
304 pests globally were selected that collectively: infest both agricultural and forestry crops,  
305 represent diverse feeding guilds, originate from both tropical and temperate  
306 environments, have large geographic ranges (preferably covering several continents),  
307 and have been well studied and monitored over recent decades (Fig. 1A & 1B). A lack  
308 of rigorous long-term monitoring, with consistent sampling effort, is probably the biggest  
309 limitation hindering efforts to characterize biological systems' responses to climate  
310 change robustly. Because of their large economic impact, insect pests represent a  
311 group of organisms with relatively good data compared to other groups; data are  
312 collected frequently but not consistently and data quality tend to be positively correlated  
313 to density and range expansion of the species. Thus, pests are good models for such  
314 efforts because abundant information about their distributions, impacts and interactions  
315 is routinely collected. However, since we selected species with large ranges, our results  
316 can be biased towards responses of species with broad thermal niches, thus the  
317 indicated general effects of climate change are likely conservative. Further, since  
318 habitats strongly affect insect ecology, we assume that species in disparate habitats will  
319 have different potential responses to climate change, so we chose species prevalent in

320 a wide spectrum of lightly-managed to heavily-managed habitats. Then, using Web of  
321 Science searches (Thomson Reuters), we selected three types of studies. First, studies  
322 that compared climate trends and empirically determined trends in relevant aspects of  
323 the chosen pests, e.g. range, abundance or damage (economic and/or ecological).  
324 Second, studies that tracked population-dependent differences in relevant traits (e.g.  
325 voltinism) of the pests across time. Third, studies that modelled attributes of the pests,  
326 including a substantial historical data component. The responses recorded in these  
327 studies were classified into four major types (Fig. 1D), and as either increasing or  
328 decreasing pest severity. We used a modified version of a semi-quantitative generic  
329 impact score system to assess impact and severity<sup>54</sup>. The data sources include studies  
330 published in scientific journals, pest management databases (e.g. EPPO and CABI) and  
331 records from national environment/pest management institutions. We also contacted  
332 several experts for assessments of data quality. A non-parametric rank order correlation  
333 analysis of explanatory and response variables was used to identify significant patterns  
334 among pest responses, ecological factors, and habitats (Table S3). Thermal suitability  
335 in different climate periods was investigated using phylogenetically corrected  
336 generalized linear least square models of thermal performance traits coupled with  
337 climate data within sampled areas (Supplement 1).

338

### 339 **Acknowledgements**

340 The authors thank Christer Wiklund, Stig Larsson and Myron Zalucki for insightful  
341 comments, Kate Mitchell for data analysis and all contributors to the book, "Climate  
342 Change and Insect Pests" edited by C. Björkman and P. Niemelä, published in 2015 by

343 CABI publishing. The work was financially supported by the research program ‘Future  
344 Forests’. GK acknowledges financial support from the Leibniz Competition (SAW-2013-  
345 IGB-2). SDE acknowledges financial support by the US Department of Agriculture’s  
346 National Institute of Food and Agriculture (award #2011-68002-3019).

347

### 348 **Author contributions**

349 All authors jointly designed the study and collected species data. SN performed the rank  
350 correlation analysis, PL, JST, MB performed the optimum temperature analysis. All  
351 authors contributed to preparation of the supplements. PL, MB, AB, SDE, JST and CB  
352 prepared the first draft of the paper, and all authors edited the final version. The authors  
353 declare no conflicts of interest.

354

355 **Supplement 1:** Extended materials and methods

356 **Supplement 2:** Species descriptions with associated references

357 **Supplement 3:** Data used in analysis

358

### 359 **References**

360 1. Thomas MB. Ecological approaches and the development of “truly integrated” pest  
361 management. *Proceedings of the National Academy of Sciences of the United States of*  
362 *America*. 1999;96:5944-5951.

363 2. Godfray HCJ, Beddington JR, Crute IR, et al. Food security: The challenge of feeding 9 billion  
364 people. *Science*. 2010;327:812-818.



- 365 3. Oerke E-. Crop losses to pests. *Journal of Agricultural Science*. 2006;144:31-43.
- 366 4. Fajvan MA, Wood JM. Stand structure and development after gypsy moth defoliation in the  
367 appalachian plateau. *Forest Ecology and Management*. 1996;89:79-88.
- 368 5. Janes JK, Li Y, Keeling CI, et al. How the mountain pine beetle (*dendroctonus ponderosae*)  
369 breached the canadian rocky mountains. *Molecular Biology and Evolution*. 2014;31(7):1803-  
370 1815.
- 371 6. Zalucki MP, Shabbir A, Silva R, Adamson D, Shu-Sheng L, Furlong MJ. Estimating the  
372 economic cost of one of the world's major insect pests, *plutella xylostella* (lepidoptera:  
373 Plutellidae): Just how long is a piece of string? *Journal of Economic Entomology*.  
374 2012;105(4):1115-1129.
- 375 7. Bradshaw CJA, Leroy B, Bellard C, et al. Massive yet grossly underestimated global costs of  
376 invasive insects. *Nature Communications*. 2016;7(12986).
- 377 8. IPCC. Summary for policymakers. In: Solomon S, Qin D, Manning M, et al, eds. *Climate*  
378 *change 2007: The physical science basis. contribution of working group I to the fourth*  
379 *assessment report of the intergovernmental panel on climate change*. Cambridge: Cambridge  
380 University Press; 2007:1-18.
- 381 9. Moran EV, Alexander JM. Evolutionary responses to global change: Lessons from invasive  
382 species. *Ecology Letters*. 2014;17:637-649.
- 383 10. Bellard C, Thuiller W, Leroy B, Genovesi P, Bakkenes M, Courchamp P. Will climate change  
384 promote future invasions? *Global Change Biology*. 2013;19:3740-3748.

- 385 11. Andrew NR, Hill SJ, Binns M, et al. Assessing insect responses to climate change: What are  
386 we testing for? where should we be heading? *PeerJ*. 2013;1(e11).
- 387 12. Taylor CM, Hastings A. Allee effects in biological invasions. *Ecology Letters*. 2005;8:895-  
388 908.
- 389 13. Thackeray SJ, Henrys PA, Hemming D, et al. Phenological sensitivity to climate across taxa  
390 and trophic levels. *Nature*. 2016;535:241-245.
- 391 14. Parmesan C, Yohe G. A globally coherent fingerprint of climate change impacts across  
392 natural systems. *Nature*. 2003;421:37-42.
- 393 15. Parmesan C. Ecological and evolutionary responses to recent climate change. *Annual*  
394 *Review of Ecology, Evolution, and Systematics*. 2006;37:637-669.
- 395 16. Chown SL, Hoffmann AA, Kristensen TN, Angilletta MJ, Stenseth NC, Pertoldi C. Adapting  
396 to climate change: A perspective from evolutionary physiology. *Climate Research*. 2010;43:3-  
397 15.
- 398 17. Urban MC, Bocedi G, Hendry AP, et al. Improving the forecast for biodiversity under climate  
399 change. *Science*. 2016;353:aad8466-1-aad8466-9.
- 400 18. Sutherst RW, Constable F, Finlay KJ, Harrington R, Luck JE, Zalucki MP. Adapting to crop  
401 pest and pathogen risks under a changing climate. *WIREs Climate Change*. 2011;2:220-237.
- 402 19. Bebbler DP, Ramotowski MAT, Gurr SJ. Crop pests and pathogens move polewards in a  
403 warming world. *Nature Climate Change*. 2013;3:985-988.
- 404 20. Parmesan C. Influences of species, latitudes and methodologies on estimates of  
405 phenological response to global warming. *Global Change Biology*. 2007;13:1860-1872.

- 406 21. Pureswaran DS, Roques A, Battisti A. Forest insects and climate change. *Current Forestry*  
407 *Reports*. 2018;4:35-50.
- 408 22. Bonebrake TC, Boggs CL, Stamberger JA, Deutsch CA, Ehrlich PR. From global change to  
409 a butterfly flapping: Biophysics and behaviour affect tropical climate change impacts.  
410 *Proceedings of the Royal Society of London B, Biological Sciences*. 2014;281(1793):1-8.
- 411 23. Hill MP, Bertelsmeier C, Clusella-Trullas S, Garnas J, Robertson MP, Terblanche JS.  
412 Predicted decrease in global climate suitability masks regional complexity of invasive fruit fly  
413 species response to climate change. *Biological Invasions*. 2016;18(4):1105-1119.
- 414 24. Bellard C, Leroy B, Thuiller W, Rysman J-, Courchamp F. Major drivers of invasion risks  
415 throughout the world. *Ecosphere*. 2016;7:e01241.
- 416 25. Tscharntke T, Tylianakis JM, Rand TA, et al. Landscape moderation of biodiversity patterns  
417 and processes - eight hypotheses. *Biological Reviews*. 2012;87:661-685.
- 418 26. Bale JS, Hayward SAL. Insect overwintering in a changing climate. *The Journal of*  
419 *Experimental Biology*. 2010;213:980-994.
- 420 27. Singer MC, Parmesan C. Phenological asynchrony between herbivorous insects and their  
421 hosts: Signal of climate change or pre-existing adaptive strategy? *Philosophical Transactions of*  
422 *The Royal Society B Biological Sciences*. 2010;365:3161-3176.
- 423 28. Cohen JM, Lajeunesse MJ, Rohr JR. A global synthesis of animal phenological responses  
424 to climate change. *Nature Climate Change*. 2018;8:224-228.

- 425 29. Bianchi FJJA, Booij CJH, Tscharntke T. Sustainable pest regulation in agricultural  
426 landscapes: A review on landscape composition, biodiversity and natural pest control.  
427 *Proceedings of the Royal Society B*. 2006;273:1715-1727.
- 428 30. Eigenbrode SD, Davis TS, Crowder DW. Climate change and biological control in  
429 agricultural systems: Principles and examples from north america. In: Björkman C, Niemelä P,  
430 eds. *Climate change and insect pests*. CABI International, Wallingford, UK.; 2015:119-136.
- 431 31. Thrall PH, Oakeshott JG, Fitt G, et al. Evolution in agriculture: The application of  
432 evolutionary approaches to the management of biotic interactions in agro-ecosystems.  
433 *Evolutionary Applications*. 2010;4:200-215.
- 434 32. Terblanche JS, Karsten M, Mitchell KA, Barton MG, Gibert P. Physiological variation of  
435 insects in agricultural landscapes: Potential impacts of climate change. In: Björkman C, Niemelä  
436 P, eds. *Climate change and insect pests*. Wallingford, UK.: CABI International; 2016:92-119.
- 437 33. Sunday JM, Bates A,E., Kearney MR, et al. Thermal-safety margins and the necessity of  
438 thermoregulatory behavior across latitude  
439 and elevation. *Proceedings of the National Academy of Sciences of the United States of*  
440 *America*. 2014;111(15):5610-5615.
- 441 34. Hoffmann AA, Chown SL, Clusella-Trullas S. Upper thermal limits in terrestrial ectotherms:  
442 How constrained are they? *Functional Ecology*. 2013;27:934-949.
- 443 35. Irlich UM, Terblanche JS, Blackburn TM, Chown SL. Insect rate-temperature relationships:  
444 Environmental variation and the metabolic theory of ecology. *The American Naturalist*.  
445 2009;174:819-835.

- 446 36. Clusella-Trullas S, Chown SL. Comment on “Erosion of lizard diversity by climate change  
447 and altered thermal niches”. *Science*. 2011;332:537.
- 448 37. Bradshaw WE, Holzapfel CM. Genetic shift in photoperiodic response correlated with global  
449 warming. *Proceedings of the National Academy of Sciences of the United States of America*.  
450 2001;98(25):14509-14511.
- 451 38. Schilthuizen M, Kellermann V. Contemporary climate change and terrestrial invertebrates:  
452 Evolutionary versus plastic changes. *Evolutionary Applications*. 2013;7:56-67.
- 453 39. Hoffmann AA, Reynolds KT, Nash MA, Weeks AR. A high incidence of parthenogenesis in  
454 agricultural pests. *Proceedings of the Royal Society of London B, Biological Sciences*.  
455 2008;75:2473-2481.
- 456 40. Hoffmann AA. Rapid adaptation of invertebrate pests to climatic stress? *Current Opinion in*  
457 *Insect Science*. 2017;21:7-13.
- 458 41. Diamond SE. Contemporary climate- driven range shifts: Putting evolution back on the  
459 table. *Functional Ecology*. 2018;In Press.
- 460 42. Merilä J, Hendry AP. Climate change, adaptation, and phenotypic plasticity: The problem  
461 and the evidence. *Evolutionary Applications*. 2013;7:1-14.
- 462 43. van Asch M, Salis L, Holleman LJM, van Lith B, Visser ME. Evolutionary response of the  
463 egg hatching date of a herbivorous insect under climate change. *Nature Climate Change*.  
464 2013;3:244-248.
- 465 44. Wan F, Yang N. Invasion and management of agricultural alien insects in china. *The Annual*  
466 *Review of Entomology*. 2016;61:77-98.

- 467 45. Bouyer J, Dicko AH, Cecchi G, et al. Mapping landscape friction to locate isolated tsetse  
468 populations that are candidates for elimination. *Proceedings of the National Academy of*  
469 *Sciences of the United States of America*. 2015;112(47):14575-14580.
- 470 46. Sgró CM, Terblanche JS, Hoffmann AA. What can plasticity contribute to insect responses  
471 to climate change? *The Annual Review of Entomology*. 2015;61:433-451.
- 472 47. Fordham DA. Mesocosms reveal ecological surprises from climate change. *PLoS Biology*.  
473 2015;13(12):e1002323.
- 474 48. DeLucia EH, Casteel CL, Nability PD, O'Neill BF. Insects take a bigger bite out of plants in a  
475 warmer, higher carbon dioxide world. *Proceedings of the National Academy of Sciences of the*  
476 *United States of America*. 2008;105(6):1781-1782.
- 477 49. Taylor KE, Stouffer RJ, Meehl GA. An overview of CMIP5 and the experiment design.  
478 *Bulletin of the American Meteorological Society*. 2012;93:486-498.
- 479 50. Kollberg I, Bylund H, Jonsson T, Schmidt A, Gerschenson J, Björkman C. Temperature  
480 affects insect outbreak risk through tritrophic interactions mediated by plant secondary  
481 compounds. *Ecosphere*. 2015;6(6):1-17.
- 482 51. Kong JD, Axford JK, Hoffmann AA, Kearney MR. Novel applications of thermocyclers for  
483 phenotyping invertebrate thermal responses. *Methods in Ecology and Evolution*. 2016;7:1201-  
484 1208.
- 485 52. Baker RHA, Anderson H, Bishop S, MacLeod A, Parkinson N, Tuffen MG. The UK plant  
486 health risk register: A tool for prioritizing actions. *EPPO Bulletin*. 2014;44:187-194.

- 487 53. Deutsch CA, Tewksbury JJ, Huey RB, et al. Impacts of climate warming on terrestrial  
488 ectotherms across latitude. *Proceedings of the National Academy of Sciences of the United*  
489 *States of America*. 2008;105(18):6668-6672.
- 490 54. Kumschick S, Bacher S, Evans T, et al. Comparing impacts of alien plants and animals in  
491 europe using a standard scoring system. *Journal of Applied Ecology*. 2015;52:552-561.
- 492

493 **Figure legends**

494 Fig. 1. The distribution of 31 insect pests according to (A) the number of species in the  
495 study occurring in each continent (with % of all those included) according to CABI. Note  
496 that many species occur on multiple continents. Flanking each continent are pie charts  
497 showing the distribution of social ecological impacts and ecological impacts caused by  
498 these species. (B) Schematic representation of four major categories of responses to  
499 climate change: range changes, life-history traits, population dynamics and trophic  
500 interactions (see Supplement 1). (C) A phylogenetic tree (compiled from the Tree-of-life  
501 project) of the 31 species considered in this analysis.

502

503 Fig. 2. Responses to climate change of 31 insect pests with high socioeconomic and/or  
504 ecological impact. (A) Shows the number of species responding in 0 to 4 traits to  
505 ongoing climate change. Dark and light blue columns in (B-E) show percentages of  
506 species displaying severity-increasing responses (e.g. increased range) and severity-  
507 decreasing responses (e.g. decreased economic damage due to smaller population  
508 size) to climate change. Single species may show multiple responses and (B-E) only  
509 display data for the 29 species that showed some response attributable to climate  
510 change (see Supplement 1). Observe that in (B-E) some species showed neither a  
511 positive or negative response in some traits, so total percentages in these cases are  
512 less than 100%.

513

514 Fig. 3. Summary figure of thermal sensitivity analysis of 31 insect pests. As input we  
515 use published optimum temperatures of the species ( $T_{opt}$ , the temperature at which  
516 performance is maximised,  $U_{max}$ ) and mean ambient temperature ( $T_{amb}$ ) during the  
517 growing season. This includes the whole year below 45°S/N, and the summer months  
518 above 45°S/N. (A) Schematic thermal performance curve including the two metrics  
519 extracted. (B) Here  $T_{amb} / T_{opt}$  is plotted against latitude for the four periods investigated  
520 (historical: 1960-1969 [blue triangles and dotted line], present: 2006-2015 [fine dashed  
521 line], near future: 2056-2065 [coarse dashed line] and future: 2070-2079 [red circles and  
522 solid line]). Stars denote significant correlations in a phylogenetically corrected



523 generalized linear least square model: \* =  $P < 0.05$ , \*\* =  $P < 0.005$  (Supplement 1). (C)  
524 Shows how many degrees  $T_{amb}$  differs from  $T_{opt}$  in past (left half of circle) and future  
525 (right half of the circle) climates. Circles have been placed in the approximate location  
526 where individual studies sampled the respective pests. Darker colors reflect ambient  
527 temperatures near the optimum temperature and therefore climates likely beneficial for  
528 pests.

529

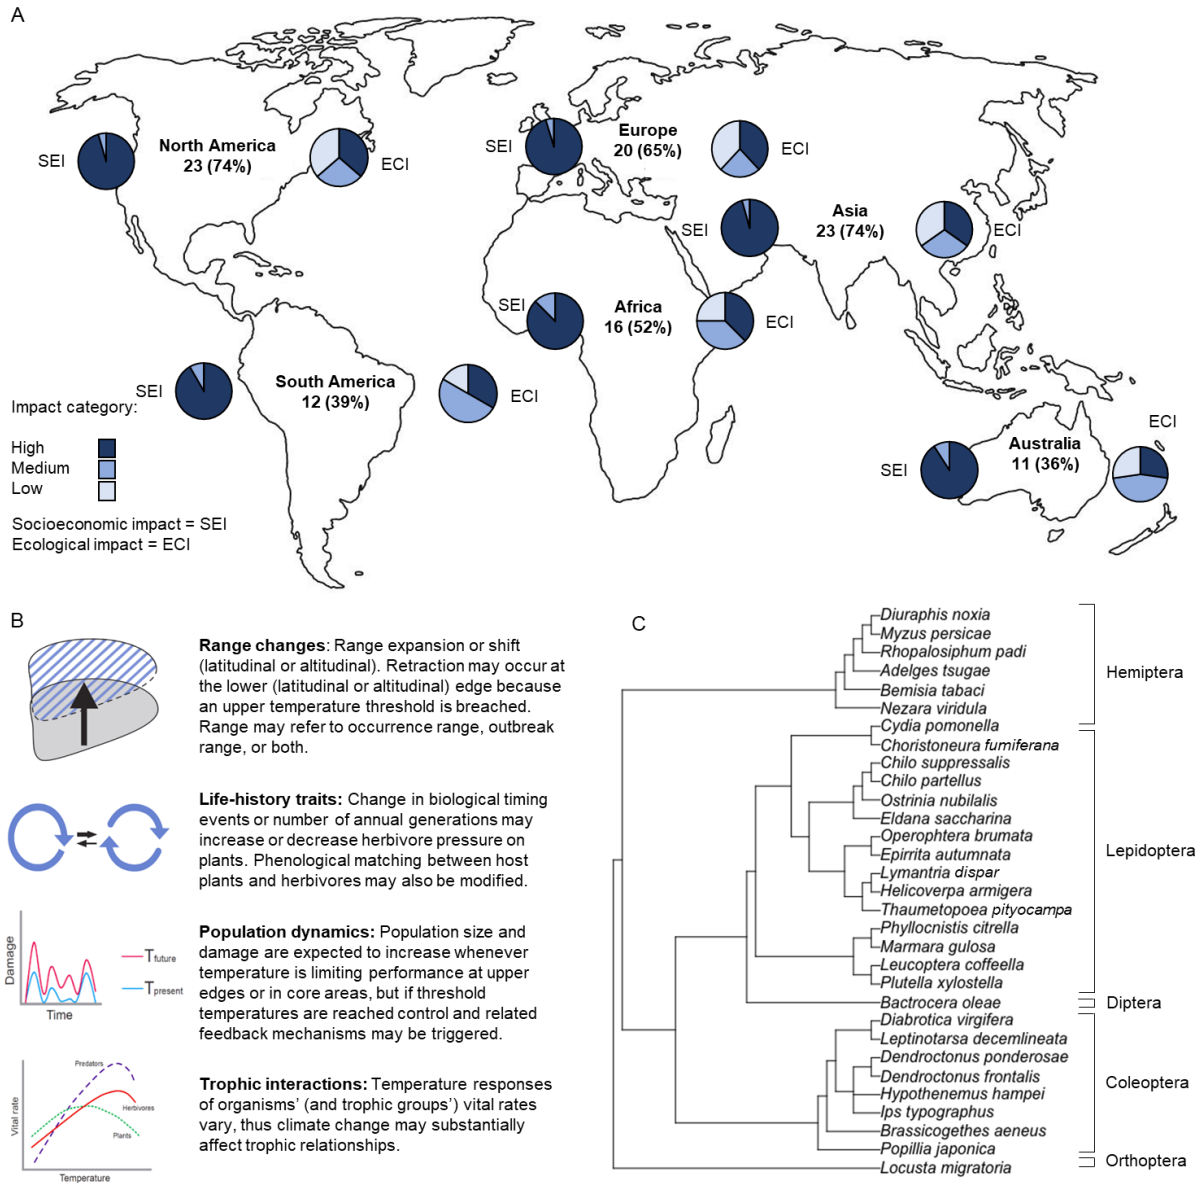

530

531 **Figure 1**

532

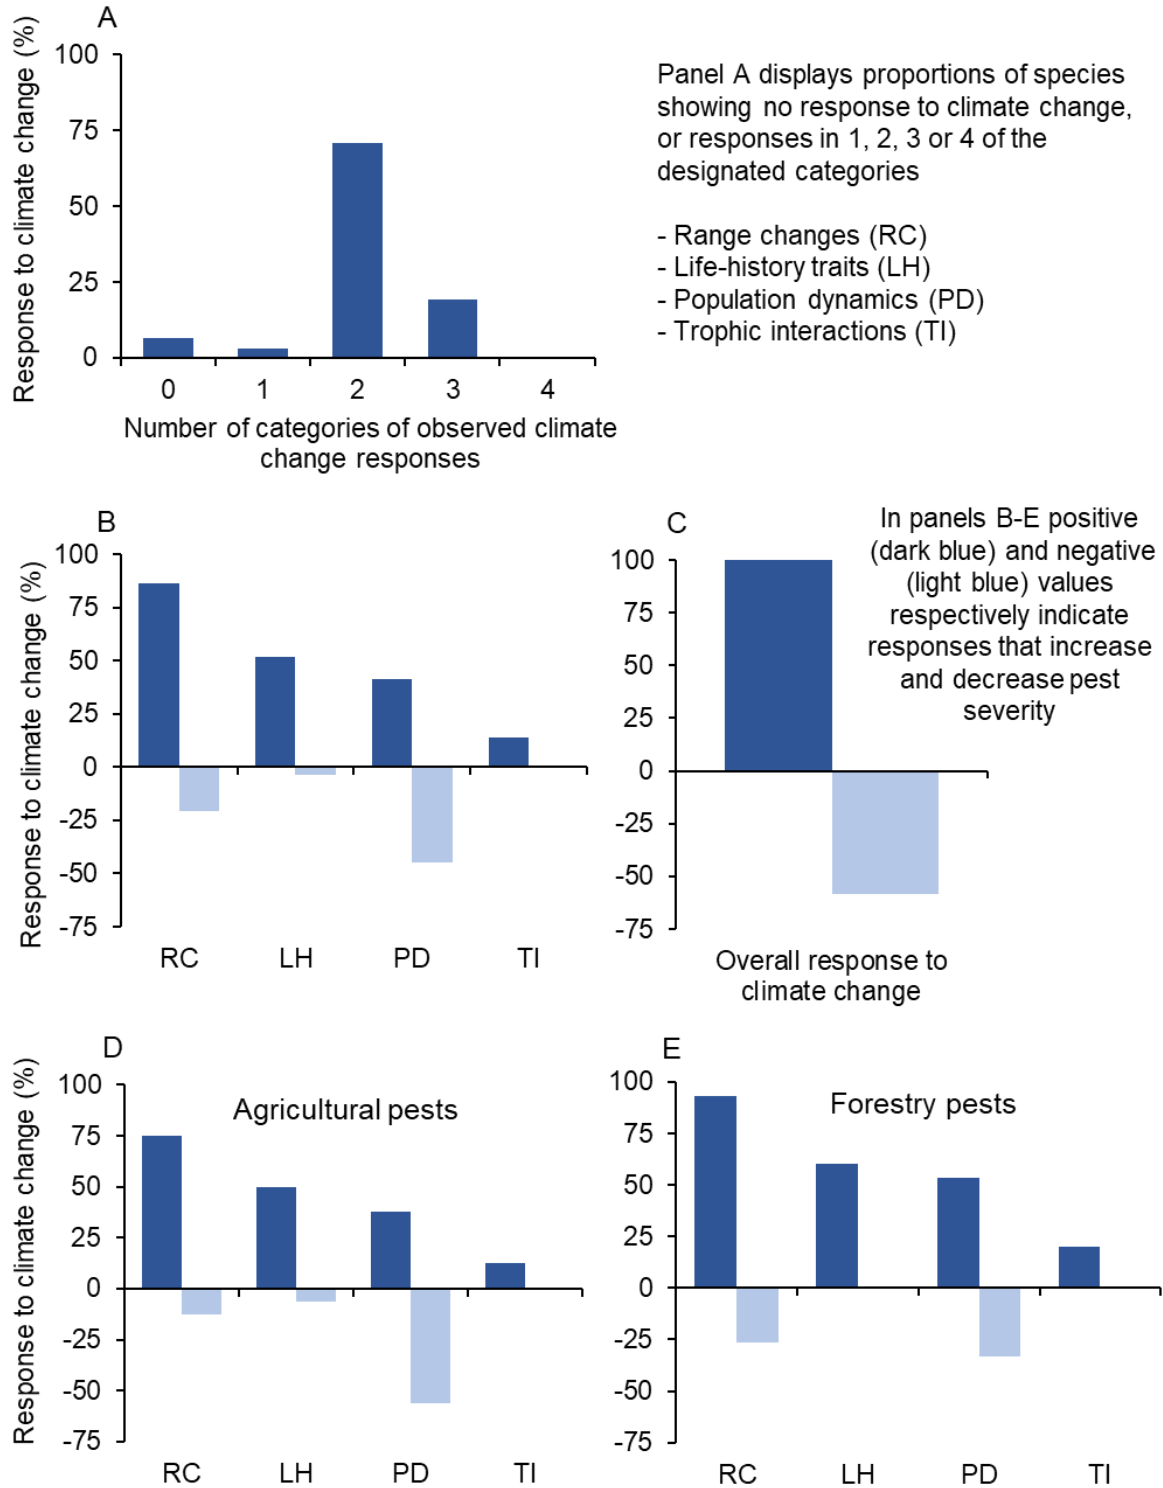

533

534 **Figure 2**

535

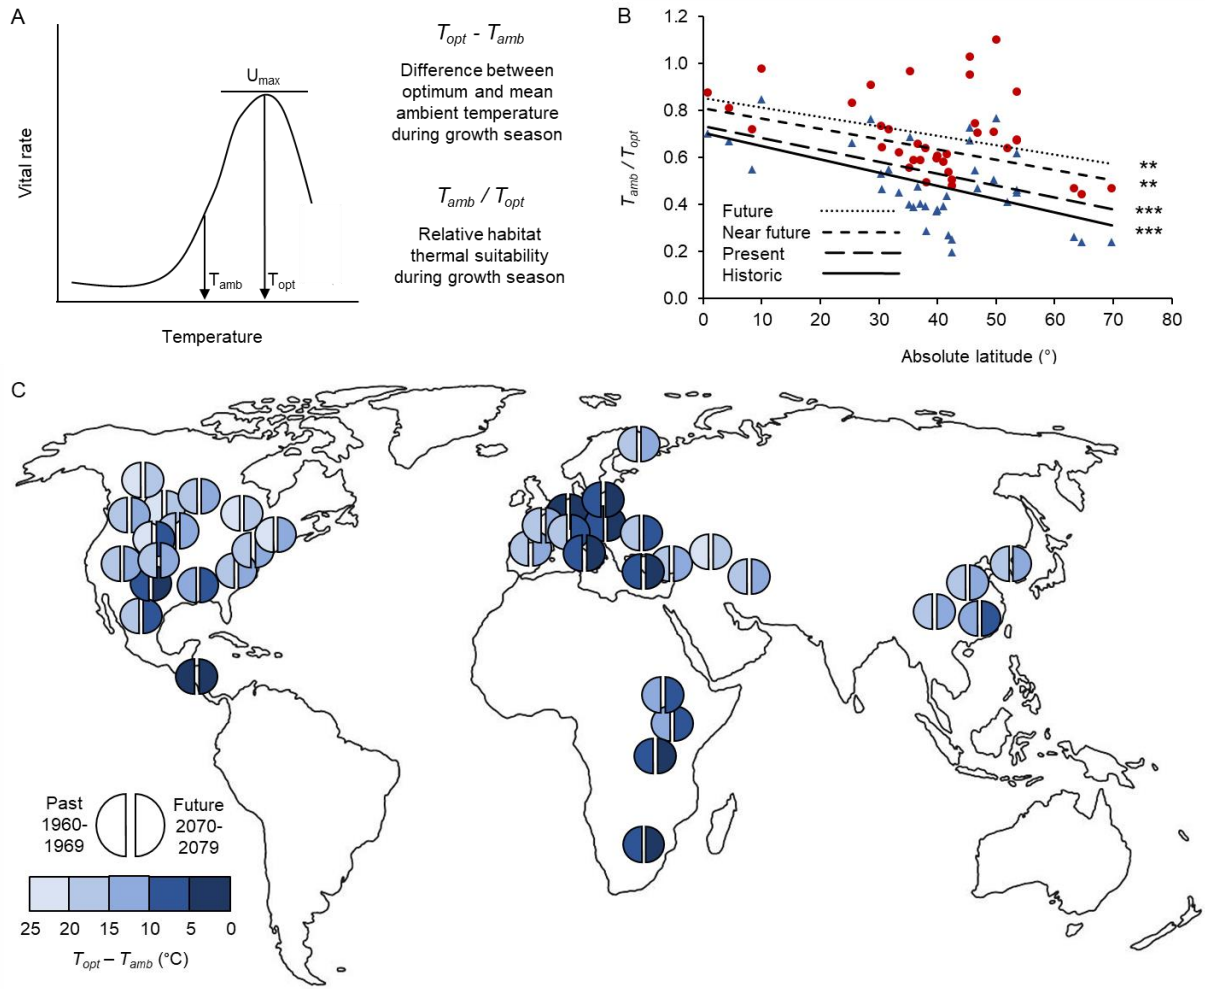

536

537 **Figure 3**

1 **Supplement 1**

2

3 **Complex responses of global insect pests to climate change**

4

5 Philipp Lehmann<sup>1,2,4\*</sup>, Tea Ammunét<sup>3†</sup>, Madeleine Barton<sup>4†</sup>, Andrea Battisti<sup>5†</sup>,  
6 Sanford D. Eigenbrode<sup>6†</sup>, Jane Uhd Jepsen<sup>7†</sup>, Gregor Kalinkat<sup>8†</sup>, Seppo Neuvonen<sup>9†</sup>,  
7 Pekka Niemelä<sup>10†</sup>, Bjørn Økland<sup>11†</sup>, John S. Terblanche<sup>4†</sup>, Christer Björkman<sup>3</sup>

8

9 <sup>1</sup>Department of Zoology, Stockholm University, Sweden. <sup>2</sup>Centre of Excellence in  
10 Biological Interactions Research, Department of Biological and Environmental  
11 Science, University of Jyväskylä, Finland. <sup>3</sup>Department of Ecology, Swedish  
12 University of Agricultural Sciences, Sweden. <sup>4</sup>Centre for Invasion Biology,  
13 Department of Conservation Ecology and Entomology, Stellenbosch University,  
14 South Africa. <sup>5</sup>Department of Agronomy, Food, Natural Resources, Animals and the  
15 Environment, University of Padova, Italy. <sup>6</sup>Department of Entomology, Plant  
16 Pathology and Nematology, University of Idaho, United States of America.  
17 <sup>7</sup>Department of Arctic Ecology, Norwegian Institute for Nature Research, Norway.  
18 <sup>8</sup>Department of Biology and Ecology of Fishes, Leibniz-Institute of Freshwater  
19 Ecology and Inland Fisheries, Germany. <sup>9</sup>Natural Resources Institute Finland,  
20 Finland. <sup>10</sup>Biodiversity Unit, University of Turku, Finland. <sup>11</sup>Norwegian Institute of  
21 Bioeconomy Research, Norway.

22

23 \*Corresponding author: Philipp Lehmann, [philipp.lehmann@zoologi.su.se](mailto:philipp.lehmann@zoologi.su.se)

24 †Contributing authors listed alphabetically

25 **Materials and methods - Definitions and classifications used in the report**

26 Data were acquired from scientific articles, governmental reports or pest record  
27 databases (e.g. EPPO, CABI). Relevant articles were primarily obtained from  
28 searches of Web of Science (<https://apps.webofknowledge.com/>). Although not a  
29 formal meta-analysis (due to the methods of selecting sources), our assessment is  
30 based on published material on the selected species that are methodologically  
31 sound and address recent and historic climate change-related responses of these  
32 species.

33

34 **Feeding guilds/Functional groups (Figure S1)**

- 35 • Defoliators (external feeders)
- 36 • Phloem feeders (external feeders)
- 37 • Fruit feeders (internal feeders)
- 38 • Stem borers (internal feeders)
- 39 • Bark beetles (internal feeders)
- 40 • Leaf miners (internal feeders)
- 41 • Root feeders (internal feeders)

42

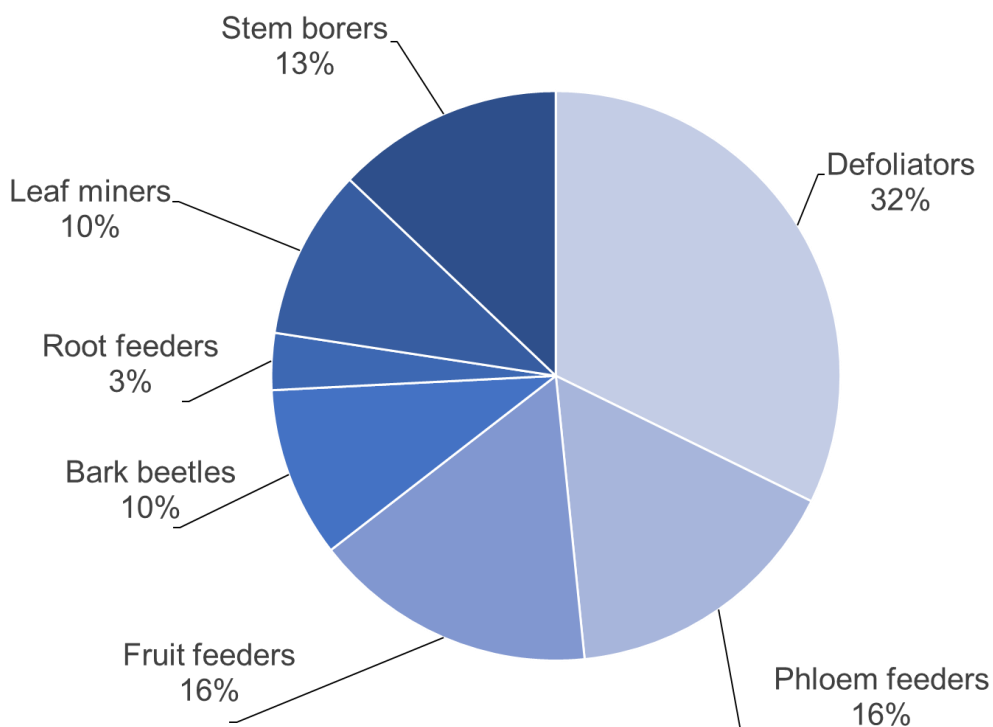

43

44 **Figure S1** The distribution of the selected 31 insect pests according to feeding guild.

45 **Annual or Perennial host(s):**

- 46 • Annual  
47 • Annual and Perennial host(s)  
48 • Perennial

49

50 **Latitude**

- 51 • Tundra (highest latitude)  
52 • Boreal (high latitude)  
53 • Temperate (low latitude)  
54 • Tropical (lowest latitude)

55

56 **Categories of responses to climate change**

57 Changes in:

- 58 • Range changes: expansion/retraction or shift in either latitudinal or altitudinal  
59 range. Warming may increase performance at range edges if temperature has  
60 previously limited performance. Retraction may occur if a high temperature  
61 threshold is breached. Range may refer to occurrence range, outbreak range or  
62 both.
- 63 • Life-history traits. A change in generation time or number of generations per year  
64 may increase or decrease herbivore pressure on plants. Phenological matching  
65 between host plants and herbivores may also be modified (but such responses  
66 are classified here as “Trophic interactions”, see below).
- 67 • Population dynamics. Damage to host plants, for various possible reasons, e.g.  
68 more frequent pest outbreaks, more intense defoliation). Expected to increase  
69 whenever temperature is limiting performance at upper edges or in core areas.  
70 Threshold levels may be reached, triggering control and related feedback  
71 mechanisms.
- 72 • Trophic interactions (e.g. host shift or a decrease in efficacy of natural predators  
73 following warming). Temperature responses of organisms’ (and trophic groups’)  
74 vital rates vary, thus climate change may substantially affect trophic relationships.  
75 We include changes in trophic interactions that have arisen due to direct impacts  
76 of climate change on the insects’ phenology.

77

78 **Direction**

79 This refers to the tendency of observed responses to increase, reduce or have  
80 neutral effects on pests' severity.

81

82 **Geographical variation in responses**

83 Responses of pests to climate change may vary in different parts of their ranges in  
84 terms of degree, type and direction (i.e. the responses may increase or decrease  
85 pests' severity) due to: genetic or plastic population-dependent differences, spatial  
86 climatic variability across the range, and varying permutations of these and other  
87 factors.

88

89 **Definitions of Socioeconomic impact**

90 1) Small impact: Negative impact, at most minor (if quantified). Such species are  
91 more nuisances than pests.

92

93 2) Medium impact: Significant reduction in performance of host (e.g. decreased  
94 fecundity, stunted growth), significant economic losses due to direct (e.g. sales) or  
95 indirect (e.g. ecosystem services, tourism) effects. Pest controllable without active  
96 management, or with reasonably small, often local, effort.

97

98 3) Large impact: Very significant reduction in performance of host (e.g. leading to  
99 death or destruction of usable product), significant economic losses due to direct or  
100 indirect effects. Pest not controllable without active, often nationwide, management,  
101 or simply not controllable.

102

103 **Definitions of Ecological impact**

104 1) Small impact: Primarily restricted to cultivated host. None or few interactions with  
105 native species.

106

107 2) Medium impact: Primarily restricted to cultivated host. Some negative interactions  
108 with native species (e.g. competition for food or resources, spread of pathogens).

109

110 3) Large impact: Host is part of natural ecosystem (even though potentially  
111 cultivated) or pest can use natural species as hosts and thus spread to the natural



112 environment. Many negative interactions with native species (e.g. competition for  
113 food or resources, spread of pathogens). Some pests may extensively kill hosts that  
114 are key species in the ecosystem.

115

### 116 **Direction of change in impact category**

117 1) Decrease: Published records show decreasing severity of pest damage, due to  
118 reductions in population densities, feeding efficacy, outbreak frequency, range, or  
119 other reasons attributable to climate change (i.e. declines in pest species fitness that  
120 have occurred in the absence of increased management actions). Reductions in  
121 management costs also indicate reductions in impact, but only indirectly so they are  
122 not used as criteria here.

123

124 2) Stable: No compelling evidence of climate-change related responses has been  
125 detected in considered studies. This could be due to several factors, but three main  
126 explanations have been proposed. (1) The phenology, abundance or distribution of  
127 the focal species may not be strongly influenced by climatic factors. (2) The focal  
128 species may be responding at rates (or in ways) that are undetectable using the  
129 applied methodology. (3) The phenology, abundance or distribution of the species  
130 may be influenced by climatic factors, but responses to current climate change may  
131 not yet be detectable due (for instance) to anthropogenic dispersal barriers (habitat  
132 fragmentation) or lags in responses<sup>1</sup>.

133

134 3) Increase: Records show increasing severity of pest damage, in either or both  
135 socioeconomic or ecological terms. Increases in damage may occur for any of the  
136 reasons outlined above, including (for instance) expansion of range or outbreak  
137 range to new cultivated areas, spread to novel hosts, spread of pathogens to novel  
138 hosts, and/or increases in number of annual generations.

139

### 140 **Critical assessment of species' responses to climate change (Table S1)**

141 Due to large variation in the amount of data available for the considered species  
142 prediction-strength is strongly biased towards the most intensively studied pests. We  
143 classify the strength of response-predictions as either strong or weak. Predictions for  
144 focal species are regarded as strong if empirically observed biological or ecological  
145 changes can be correlated with climatic changes, and reinforced if corroborated by

146 modelling or laboratory studies. In a few cases predictions based on extensive  
147 species-specific modelling with extensive historic data components are also deemed  
148 strong. In contrast, predictions are regarded as weak if reported responses are  
149 based purely on modelling, modelling and laboratory studies, and/or some  
150 observations that may be correlated with climactic change, but there are strongly  
151 confounding effects of other biological or ecological factors (e.g. invasion dynamics).  
152 Predictions for responses of 23 (74%) and eight (23%) of the 31 species considered  
153 here were regarded as strong and weak, respectively. Two pests (*Marmara gulosa*  
154 and *Phyllocnistis citrella*) were removed from the main analysis (Table S1) since no  
155 pertinent information was found.

156  
157 The assessments for each species can be found in Supplementary File 2, while  
158 relevant studies showing or suggesting responses are cited in Table S1. As has  
159 been suggested in several recent studies<sup>2-4</sup> holistic integrated analyses are to be  
160 preferred over single-trait analyses when assessing climate change responses, and  
161 this is what we attempted to achieve with our approach. Thus while the present study  
162 is neither a formal meta-analysis nor exhaustive, it synthesizes current knowledge of  
163 integrated climatic responses of 31 pests with the aim to illustrate general patterns,  
164 problems and challenges, in a precautionary manner.

165

### 166 **Rank order correlation (Table S2)**

167 Associations between explanatory and response variables regarding effects of  
168 climate change on the 31 selected serious insect pests were explored by Kendall  
169 rank order correlation analysis. The results are presented in Table S3, and the  
170 following list explains abbreviations and the range of these variables, which are listed  
171 in the beginning of this supplementary document and used in the table. NRT =  
172 Number of response categories (1 – 3), PA = Perennial or annual host (1 [perennial]  
173 – 3 [annual]), IE = Internal or external feeder (1 [external] – 2 [internal]), BRANK =  
174 Mean habitat biome ranked from tundra to tropical (1 [tundra] – 4 [tropical]), AF =  
175 Agricultural or Forestry pest (1 [agricultural] – 2 [forestry]), SEI = Socioeconomic  
176 impact (2 [low] – 3 [high]), SEId = Change in Socioeconomic impact (1 [decrease] –  
177 3 [increase]), ECI = Ecological impact (1 [low] – 3 [high]), ECId = Change in  
178 ecological impact (1 [decrease] – 3 [increase]), GD = Difference between  
179 geographical areas of range (1 [no] – 2 [yes]).

180

181 The results of the correlation analysis were briefly as follows. For some traits, such  
182 as NRT, there was very little variation among pests (Fig. 2a), and thus no significant  
183 correlations with other variables. There were some expected correlations between  
184 explanatory variables such as: a positive correlation between PA and AF, indicating  
185 that most pests on forestry hosts are pests on perennial plants; a negative  
186 correlation between IE and Brank, indicating that internally feeding pests become  
187 less common as latitude increases, and finally; a negative correlation between Brank  
188 and AF, indicating that pests in agricultural habitats are generally found at lower  
189 latitudes than pests in forestry habitats (Table S2).

190

191 There were several strong correlations between explanatory and response variables,  
192 and interestingly most of these concerned the ecological impact, rather than  
193 socioeconomic impact, of the pests. This is likely due to selection bias, since pests of  
194 high socioeconomic impact were chosen, thus there was little baseline variation in  
195 that variable. However, there was a positive correlation between IE and SEI,  
196 indicating that external feeders among the selected pests generally have higher  
197 socioeconomic impact than the internal feeders. ECI was found to be significantly  
198 positively correlated with PA, IE, Brank and AF. These findings indicate, briefly, that  
199 pests' ecological impact increases with latitude, and externally feeding forest pests  
200 have stronger ecological impacts than internally feeding agricultural pests.

201

202 The most interesting finding, in the context of this study, was that several of both the  
203 explanatory and response variables were significantly correlated with ECId, *inter alia*  
204 as Brank was negatively correlated with ECId, indicating that changes in ecological  
205 impact increase as latitude increases. There was also a positive correlation between  
206 AF and SEId, suggesting that the severity of agricultural pests is increasing more  
207 than forestry pests' severity (possibly because most serious forestry pests already  
208 have major ecological impact). Furthermore, there was a positive correlation  
209 between ECId and SEId, suggesting that pests that are becoming more  
210 socioeconomically destructive are also becoming more ecologically damaging.  
211 Finally, there was a positive correlation between ECI and ECId, suggesting that  
212 pests with the strongest current ecological impacts are more likely to become  
213 increasingly damaging than pests with low current ecological impact.

214

215 **Optimal temperature in the past, the present and the future (Table S3 and S4)**

216 A meta-analysis on optimal temperatures of the 31 insect pest species was  
217 conducted to quantify potential climate change stress. We extracted optimal  
218 temperatures for development ( $T_{opt}$ ) for the species from the primary literature, giving  
219 priority to studies investigating temperature dependence of the whole life-cycle, as  
220 well as using populations from the core of the range. Latitude and longitude  
221 coordinates were either copied straight from the article, or extracted from global  
222 maps based on the sampling location reported in the original article. The data is  
223 shown in Table S3.

224

225 Ambient temperatures at each location in our species database (Table 3) were  
226 extracted from a Global Circulation Model that forms part of the *Coupled Model*  
227 *Intercomparison Project* phase 5<sup>5,6</sup>, which we sourced directly from the Earth System  
228 Grid database (<http://pcmdi9.llnl.gov/>). More specifically we considered predictions of  
229 average monthly near surface temperature (ambient temperature hereafter,  $T_{amb}$ )  
230 from the HadGEM2-CC model<sup>7</sup>. For the present and future conditions, we  
231 considered models with a radiative forcing of  $8.5\text{Wm}^{-2}$  (Representative  
232 Concentration Pathway 8.5), the most extreme climate warming scenario included in  
233 the IPCC Fourth Assessment report<sup>8</sup>, and that which is most representative of  
234 current trajectories<sup>9</sup>. Here, we aimed to capture “present” ambient temperatures  
235 (2006-2015), “near-future” ambient temperatures (2056-2065) and “future” ambient  
236 temperatures (2070-2079). The “past” temperatures were extracted from the  
237 historical experiment of the same model. Across each of these four decades, we  
238 calculated an overall average mean temperature from the 12 monthly averages for  
239 each year. As species at high latitudes in the northern hemisphere undergo a period  
240 of dormancy during winter (and hence are buffered from winter temperatures), for  
241 locations above  $45^\circ$  latitude (15 of 38 locations, Table 3), we considered only  
242 temperatures during the summer months from May to September inclusive. Data  
243 were extracted from raw files, and subsequently cleaned using functions in the  
244 “raster” package for R<sup>10</sup>. The full R-code workflow can be found at GitHub: XXX

245

246 The overall  $T_{amb}$  for each of the four decades were compared against the species  
247  $T_{opt}$  at each location in two ways. First by visually comparing the differential between  
248  $T_{opt}$  and  $T_{amb}$  (Fig. 3) and then with a phylogenetically corrected generalized linear  
249 least square model (pgls) investigating the relationship between thermal suitability  
250 (expressed as  $T_{opt} / T_{amb}$ ) and absolute latitude. Data were extracted from the  
251 literature (Table S3) and the models run using primarily the “pgls” function in the  
252 “caper” package for R<sup>11</sup>. Overall model results are shown in Table S4 and the full R-  
253 code workflow can be found at GitHub: XXX

254 **Table S1** The 31 major pest species' responses to ongoing climate change in four major categories (range change, life-history  
 255 traits, population dynamics and trophic interactions), showing whether they are likely to increase or reduce the pests' severity.

| Trait                            |                              | Range change |          | Life-history traits |          | Population dynamics |          | Trophic interaction |          |
|----------------------------------|------------------------------|--------------|----------|---------------------|----------|---------------------|----------|---------------------|----------|
|                                  |                              | Increase     | Decrease | Increase            | Decrease | Increase            | Decrease | Increase            | Decrease |
| Change in severity               |                              |              |          |                     |          |                     |          |                     |          |
| Name                             | Order: Family                |              |          |                     |          |                     |          |                     |          |
| <i>Choristoneura fumiferana</i>  | Lepidoptera: Tortricidae     | 12-14        | 15       | -                   | -        | 12                  | -        | -                   | -        |
| <i>Lymantria dispar</i>          | Lepidoptera: Erebididae      | 16-18        | 15       | -                   | -        | 15                  | 15       | -                   | -        |
| <i>Operophtera brumata</i>       | Lepidoptera: Geometridae     | 19-21        | -        | -                   | -        | 22                  | -        | 23,24               | -        |
| <i>Epirrita autumnata</i>        | Lepidoptera: Geometridae     | 19,20        | -        | -                   | -        | -                   | 25,26    | -                   | -        |
| <i>Thaumetopoea pityocampa</i>   | Lepidoptera: Thaumetopoeidae | 27-30        | -        | -                   | -        | -                   | -        | 31                  | -        |
| <i>Leptinotarsa decemlineata</i> | Coleoptera: Chrysomelidae    | 32-37        | -        | 34,37,38            | 34       | -                   | -        | -                   | -        |
| <i>Locusta migratoria</i>        | Orthoptera: Acrididae        | -            | 39,40    | -                   | -        | -                   | 39,40    | -                   | -        |
| <i>Meligethes aeneus</i>         | Coleoptera: Nitidulidae      | 41-43        | -        | -                   | -        | -                   | -        | -                   | -        |
| <i>Plutella xylostella</i>       | Lepidoptera: Plutellidae     | 44-46        | -        | 46                  | -        | -                   | -        | -                   | -        |
| <i>Rhopalosiphum padi</i>        | Hemiptera: Aphididae         | 47-49        | -        | 49,50               | -        | 49                  | 49       | -                   | -        |
| <i>Diuraphis noxia</i>           | Hemiptera: Aphididae         | 51           | -        | -                   | -        | 51                  | 51,52    | -                   | -        |
| <i>Adelges tsugae</i>            | Hemiptera: Adelgidae         | 53-56        | -        | 54                  | -        | 55-56               | 53       | -                   | -        |
| <i>Bemisia tabaci</i>            | Hemiptera: Aleyrodidae       | 57,58        | -        | -                   | -        | 58                  | 59       | -                   | -        |
| <i>Nezara viridula</i>           | Hemiptera: Pentatomidae      | 60           | -        | 61                  | -        | -                   | 61       | -                   | -        |
| <i>Chilo suppressalis</i>        | Lepidoptera: Crambidae       | 62           | -        | 62,63               | -        | -                   | 62       | -                   | -        |
| <i>Ostrinia nubilalis</i>        | Lepidoptera: Crambidae       | -            | -        | 64-66               | -        | 67,68               | -        | -                   | -        |
| <i>Helicoverpa armigera</i>      | Lepidoptera: Noctuidae       | 68-70        | -        | -                   | -        | 69,71-73            | 74       | -                   | -        |
| <i>Dendroctonus ponderosae</i>   | Coleoptera: Curculionidae    | 75,76        | -        | 76                  | -        | 75                  | -        | -                   | -        |
| <i>Dendroctonus frontalis</i>    | Coleoptera: Curculionidae    | 77-81        | -        | 77,79               | -        | -                   | -        | -                   | -        |
| <i>Ips typographus</i>           | Coleoptera: Curculionidae    | 82,83        | -        | 82-87               | -        | 84,86,87            | -        | -                   | -        |
| <i>Bactrocera oleae</i>          | Diptera: Tephritidae         | 88,89        | 88       | -                   | -        | 89,90               | 89       | -                   | -        |
| <i>Cydia pomonella</i>           | Lepidoptera: Tortricidae     | 91           | 92,93    | 91,94,95            | -        | -                   | -        | -                   | -        |
| <i>Hypothenemus hampei</i>       | Coleoptera: Curculionidae    | 96,97        | -        | 96-98               | -        | -                   | -        | -                   | -        |
| <i>Diabrotica virgifera</i>      | Coleoptera: Chrysomelidae    | 99-101       | -        | -                   | -        | -                   | -        | -                   | -        |
| <i>Popillia japonica</i>         | Coleoptera: Scarabaeidae     | -            | -        | -                   | -        | 102-107             | 108      | 106                 | -        |
| <i>Eldana saccharina</i>         | Lepidoptera: Pyralidae       | 109,110      | -        | -                   | -        | -                   | 111,112  | -                   | -        |
| <i>Leucoptera coffeella</i>      | Lepidoptera: Lyonetiidae     | 113,114      | -        | 113                 | -        | -                   | -        | -                   | -        |
| <i>Marmara gulosa</i>            | Lepidoptera: Gracillariidae  | -            | -        | -                   | -        | -                   | -        | -                   | -        |
| <i>Phyllocnistis citrella</i>    | Lepidoptera: Gracillariidae  | -            | -        | -                   | -        | -                   | -        | -                   | -        |
| <i>Chilo partellus</i>           | Lepidoptera: Crambidae       | 115,116      | 117      | 117                 | -        | -                   | -        | -                   | -        |
| <i>Myzus persicae</i>            | Hemiptera: Aphididae         | -            | -        | 118                 | -        | 118                 | -        | 119                 | -        |

256 Empty cells indicate lack of data or studies, while numbers refer to individual studies showing (empirical studies) or suggesting (modelling and laboratory studies) a response.

257 **Table S2** Kendall rank order correlations of background traits and responses to ongoing climate change investigated in the 31  
 258 serious insect pests.

|       | NRT <sup>1</sup> | PA <sup>2</sup> | IE <sup>3</sup> | Brank <sup>4</sup> | AF <sup>5</sup> | SEI <sup>6</sup> | SEId <sup>7</sup> | ECI <sup>8</sup> | ECId <sup>9</sup> | GD <sup>10</sup> |
|-------|------------------|-----------------|-----------------|--------------------|-----------------|------------------|-------------------|------------------|-------------------|------------------|
| N     | 29               | 29              | 29              | 29                 | 29              | 29               | 29                | 29               | 29                | 29               |
| NRT   | 1                |                 |                 |                    |                 |                  |                   |                  |                   |                  |
| PA    | 0.251            | 1               |                 |                    |                 |                  |                   |                  |                   |                  |
| IE    | -0.248           | -0.099          | 1               |                    |                 |                  |                   |                  |                   |                  |
| Brank | -0.043           | -0.194          | -0.310          | 1                  |                 |                  |                   |                  |                   |                  |
| AF    | 0.236            | <b>0.699</b>    | 0.155           | <b>-0.461</b>      | 1               |                  |                   |                  |                   |                  |
| SEI   | -0.109           | 0.103           | <b>0.377</b>    | -0.143             | -0.017          | 1                |                   |                  |                   |                  |
| SEId  | -0.023           | 0.097           | -0.138          | -0.190             | 0.167           | 0.084            | 1                 |                  |                   |                  |
| ECI   | 0.199            | <b>0.349</b>    | <b>0.376</b>    | <b>-0.349</b>      | <b>0.647</b>    | 0.123            | 0.085             | 1                |                   |                  |
| ECId  | -0.009           | 0.132           | 0.126           | <b>-0.344</b>      | <b>0.447</b>    | -0.084           | <b>0.597</b>      | <b>0.463</b>     | 1                 |                  |
| GD    | 0.068            | 0.116           | -0.276          | -0.122             | 0.064           | -0.032           | <b>0.318</b>      | 0.154            | 0.316             | 1                |

259 The following list explains abbreviations used (listed in the beginning of this supplement): <sup>1</sup>Number of response types, <sup>2</sup>Perennial or annual host, <sup>3</sup>External or internal feeder,  
 260 <sup>4</sup>Mean habitat biome ranked from tundra to tropical, <sup>5</sup>Agricultural or Forestry pest, <sup>6</sup>Socioeconomic impact, <sup>7</sup>Change in Socioeconomic impact, <sup>8</sup>Ecological impact, <sup>9</sup>Change in  
 261 ecological impact, <sup>10</sup>Difference between geographical areas of range. Significant two-tailed correlation coefficient values where p<0.05 (>0.312), and p<0.01 (>0.430) are  
 262 indicated in bold, and both bold and underlined, respectively.

263  
264

**Table S3** Input data for optimal temperature analysis.

| Scientific name                  | Topt | Lifestage        | Latitude | Longitude | Position in range | Invasion status | Reference          | Avg temp 1960-1969 | Avg Temp 2006-2016 | Avg temp 2050-2059 | Avg temp 2070-2079 |
|----------------------------------|------|------------------|----------|-----------|-------------------|-----------------|--------------------|--------------------|--------------------|--------------------|--------------------|
| <i>Choristoneura fumiferana</i>  | 28.7 | Egg to pupa      | 63,22    | -123,48   | CR                | Native          | <sup>120</sup>     | 7,5                | 9,4                | 12,0               | 13,5               |
| <i>Choristoneura fumiferana</i>  | 28.6 | Egg to pupa      | 53,50    | -113,53   | CR                | Native          | <sup>120</sup>     | 12,9               | 14,3               | 17,5               | 19,4               |
| <i>Choristoneura fumiferana</i>  | 29.2 | Egg to pupa      | 64,67    | -124,92   | CR                | Native          | <sup>120</sup>     | 7,1                | 8,8                | 11,4               | 13,0               |
| <i>Choristoneura fumiferana</i>  | 29.1 | Egg to pupa      | 51,95    | -114,25   | CR                | Native          | <sup>120</sup>     | 12,0               | 13,5               | 16,8               | 18,6               |
| <i>Choristoneura fumiferana</i>  | 30.9 | Egg to pupa      | 53,52    | -113,26   | CR                | Native          | <sup>120</sup>     | 14,3               | 15,7               | 19,1               | 20,9               |
| <i>Choristoneura fumiferana</i>  | 33.0 | Egg to pupa      | 49,65    | -110,03   | CR                | Native          | <sup>120</sup>     | 16,7               | 17,9               | 21,7               | 23,5               |
| <i>Lymantria dispar</i>          | 28,0 | Egg to pupa      | 39,83    | -74,87    | CR                | Native          | <sup>121</sup>     | 10,4               | 12,3               | 15,1               | 16,7               |
| <i>Operophtera brumata</i>       | 22,0 | Larva            | 69,64    | 19,01     | CR                | Native          | <sup>122</sup>     | 16,9               | 19,0               | 21,7               | 24,3               |
| <i>Epirrita autumnata</i>        | 25,0 | Larva            | 50,09    | 7,32      | CR                | Native          | <sup>123</sup>     | 6,1                | 7,8                | 10,5               | 11,7               |
| <i>Thaumetopoea pityocampa</i>   | 25,0 | Larva            | 69,64    | 19,01     | CR                | Native          | <sup>124</sup>     | 18,2               | 19,6               | 23,9               | 25,8               |
| <i>Leptinotarsa decemlineata</i> | 28,0 | Egg to pupa      | 69,73    | 27,01     | UN, HA            | Invasive        | <sup>125</sup>     | 7,0                | 9,1                | 12,3               | 14,1               |
| <i>Locusta migratoria</i>        | 30,0 | Nymph            | 45,50    | 11,15     | CR                | Native          | <sup>126</sup>     | 13,6               | 14,1               | 17,4               | 18,7               |
| <i>Meligethes aeneus</i>         | 24,0 | Egg to pupa      | 42,41    | -71,38    | CR                | Native          | <sup>127</sup>     | 14,9               | 16,9               | 19,1               | 21,1               |
| <i>Plutella xylostella</i>       | 28,8 | Whole life cycle | 33,46    | 120,01    | CR                | Native          | <sup>128</sup>     | 11,2               | 13,0               | 15,3               | 16,9               |
| <i>Rhopalosiphum padi</i>        | 28,5 | Whole life cycle | 53,53    | 10,01     | CR                | Native          | <sup>129,130</sup> | 12,5               | 13,5               | 16,6               | 17,5               |
| <i>Diuraphis noxia</i>           | 20,0 | Whole life cycle | 35,84    | 50,96     | CR                | Invasive        | <sup>131,132</sup> | 13,7               | 15,7               | 17,6               | 19,3               |



|                         |      |                  |        |         |        |          |                    |      |      |      |      |
|-------------------------|------|------------------|--------|---------|--------|----------|--------------------|------|------|------|------|
| Adelges tsugae          | X    | X                | X      | X       | X      | X        | X                  | X    | X    | X    | X    |
| Bemisia tabaci          | 31,0 | Whole life cycle | 35,16  | 128,14  | CR     | Native   | <sup>133,134</sup> | 12,4 | 13,3 | 16,3 | 17,3 |
| Nezara viridula         | 27,0 | Nymph            | 37,99  | -84,66  | CR     | Native   | <sup>135</sup>     | 10,6 | 12,5 | 15,5 | 17,3 |
| Chilo suppressalis      | 31,0 | Egg to pupa      | 30,53  | 114,33  | CR     | Native   | <sup>136</sup>     | 14,5 | 15,3 | 18,4 | 20,0 |
| Ostrinia nubilalis      | 34,0 | Larva            | 46,40  | 0,05    | CR     | Native   | <sup>137</sup>     | 18,6 | 20,5 | 22,8 | 25,4 |
| Helicoverpa armigera    | 27,5 | Whole life cycle | 40,97  | 23,59   | CR     | Native   | <sup>138</sup>     | 10,8 | 12,2 | 15,3 | 16,0 |
| Dendroctonus ponderosae | 24,0 | Whole life cycle | 41,83  | -111,60 | CR     | Native   | <sup>139</sup>     | 6,5  | 8,4  | 11,1 | 13,0 |
| Dendroctonus frontalis  | 31,1 | Whole life cycle | 31,59  | -94,80  | CR     | Native   | <sup>140</sup>     | 17,1 | 18,6 | 21,0 | 22,5 |
| Ips typographus         | 30,4 | Whole life cycle | 46,86  | 9,66    | CR     | Native   | <sup>141,142</sup> | 14,2 | 15,6 | 19,2 | 21,4 |
| Bactrocera oleae        | 27,0 | Egg to pupa      | 45,50  | 11,15   | CR     | Invasive | <sup>143,144</sup> | 18,2 | 19,6 | 23,9 | 25,8 |
| Cydia pomonella         | 30,7 | Larva            | 38,10  | 46,48   | CR     | Native   | <sup>145</sup>     | 8,9  | 10,9 | 13,6 | 15,2 |
| Hypothenemus hampei     | 26,7 | Whole life cycle | -0,76  | 34,72   | CR     | Native   | <sup>96</sup>      | 18,7 | 19,8 | 22,1 | 23,4 |
| Diabrotica virgifera    | 28,0 | Egg              | 42,44  | -81,89  | CR     | Invasive | <sup>146</sup>     | 5,5  | 7,9  | 11,4 | 13,5 |
| Popillia japonica       | 27,5 | Larva            | 39,96  | -75,19  | UN, HA | Invasive | <sup>147</sup>     | 10,4 | 12,3 | 15,1 | 16,7 |
| Eldana saccharina       | 29,0 | Egg to adult     | -25,46 | 31,58   | CR     | Invasive | <sup>148</sup>     | 19,3 | 20,2 | 22,3 | 24,1 |
| Leucoptera coffeella    | 30,0 | Larva            | 9,95   | -84,01  | CR     | Native   | <sup>149</sup>     | 25,4 | 26,2 | 28,0 | 29,3 |
| Marmara gulosa          | 29,0 | Egg to pupa      | 36,60  | -119,51 | CR     | Invasive | <sup>150</sup>     | 13,8 | 15,4 | 18,0 | 19,1 |
| Phyllocnistis citrella  | 30,0 | Adult            | 36,99  | 35,34   | CR     | Invasive | <sup>151</sup>     | 12,2 | 13,4 | 16,2 | 17,7 |
| Chilo partellus         | 32,0 | Larva            | 4,43   | 39,31   | UN, HA | Invasive | <sup>117</sup>     | 21,4 | 22,6 | 24,8 | 26,0 |

|                 |      |             |       |        |        |          |                |      |      |      |      |
|-----------------|------|-------------|-------|--------|--------|----------|----------------|------|------|------|------|
| Chilo partellus | 32,0 | Larva       | 8,40  | 39,35  | UN, HA | Invasive | <sup>152</sup> | 16,5 | 17,6 | 20,1 | 21,6 |
| Chilo partellus | 32,0 | Larva       | 28,64 | 77,16  | UN, HA | Invasive | <sup>153</sup> | 21,0 | 21,6 | 23,4 | 25,0 |
| Myzus persicae  | 26,5 | Egg to pupa | 30,30 | 120,12 | CR     | Native   | <sup>154</sup> | 14,1 | 14,8 | 18,0 | 19,4 |

265 CR = Core range, UN, HA = Unknown position in range, but occurring in high abundance. For some pests there are several thermal  
266 performance studies available. Here we chose the most comprehensive (in terms of methodology, temperature range, and life-stages  
267 analysed), and for two species (*Choristoneura fumiferana* and *Chilo partellus*) we included several populations that had been investigated.

**Table S4** Coefficients of variation in phylogenetically controlled generalized least square models (pgls) testing the relationship between temperature suitability and latitude in four different time-periods (past: 1960-1969, present: 2005-2015, near future: 2056-2065 and future: 2070-2079).

| Effect      | Estimate | Std. Error | t value | Significance |
|-------------|----------|------------|---------|--------------|
| Past        |          |            |         |              |
| Intercept   | 0.741    | 0.078      | 9.464   | < 0.001      |
| Latitude    | -0.008   | 0.002      | -3.879  | < 0.001      |
| Present     |          |            |         |              |
| Intercept   | 0.768    | 0.073      | 10.475  | < 0.001      |
| Latitude    | -0.007   | 0.001      | -3.788  | 0.001        |
| Near future |          |            |         |              |
| Intercept   | 0.831    | 0.079      | 10.514  | < 0.001      |
| Latitude    | -0.006   | 0.002      | -2.980  | 0.007        |
| Future      |          |            |         |              |
| Intercept   | 0.878    | 0.081      | 10.872  | < 0.001      |
| Latitude    | -0.006   | 0.002      | -2.790  | 0.011        |

## References for Supplement 1

1. Parmesan C, Yohe G. A globally coherent fingerprint of climate change impacts across natural systems. *Nature*. 2003;421:37-42.
2. Urban MC, Bocedi G, Hendry AP, et al. Improving the forecast for biodiversity under climate change. *Science*. 2016;353:aad8466-1-aad8466-9.
3. Cohen JM, Lajeunesse MJ, Rohr JR. A global synthesis of animal phenological responses to climate change. *Nature Climate Change*. 2018;8:224-228.
4. Bellard C, Thuiller W, Leroy B, Genovesi P, Bakkenes M, Courchamp P. Will climate change promote future invasions? *Global Change Biology*. 2013;19:3740-3748.
5. Riahi K, Rao S, Krey V, et al. RCP 8.5 — A scenario of comparatively high greenhouse gas emissions. *Climate Change*. 2011;109:33-57.
6. Taylor KE, Stouffer RJ, Meehl GA. An overview of CMIP5 and the experiment design. *Bulletin of the American Meteorological Society*. 2012;93:486-498.
7. Martin GM, Bellouin N, Collins WJ, et al. The HadGEM2 family of met office unified model climate configurations. *Geoscientific Model Development*. 2011;4:723-757.
8. IPCC. Summary for policymakers. In: Solomon S, Qin D, Manning M, et al, eds. *Climate change 2007: The physical science basis. contribution of working group I to the fourth assessment report of the intergovernmental panel on climate change*. Cambridge: Cambridge University Press; 2007:1-18.
9. Jackson RB, Le Quéré C, Andrew RM, et al. Warning signs for stabilizing global CO<sub>2</sub> emissions. *Environmental Research Letters*. 2017;12:110202.
10. Hijmans RJ, van Etten J. Raster: Geographic analysis and modeling with raster data. . 2012.

11. Freckleton RP, Harvey PH, Pagel M. Phylogenetic analysis and comparative data: A test and review of evidence. *American Naturalist*. 2002;160:712-726.
12. Gray DR. The influence of forest composition and climate on outbreak characteristics of spruce budworm in Canada. *Canadian Journal of Forest Research*. 2013;43:1181-1195.
13. Gray DR, Régnière J, Boulet B. Analysis and use of historical patterns of spruce budworm defoliation to forecast outbreak patterns in Quebec. *Forest Ecology and Management*. 2000;127:217-231.
14. Régnière J, St-Amant R, Duval P. Predicting insect distributions under climate change from physiological responses: Spruce budworm as an example. *Biological Invasions*. 2012;14:1571-1586.
15. Williams DW, Liebhold AM. Herbivorous insects and global change: Potential changes in the spatial distribution of forest defoliator outbreaks. *Journal of Biogeography*. 1995;22:665-671.
16. Régnière J, Nealis V, Porter K. Climate suitability and management of the gypsy moth invasion into Canada. *Biological Invasions*. 2009;11:135-148.
17. Vanhanen H, Veteli TO, Päivinen S, Kellomäki S, Niemelä P. Climate change and range shifts in two insect defoliators: Gypsy moth and nun moth - a model study. *Silva Fennica*. 2007;41:621-638.
18. Fält-Nardmann JJJ, Tikkanen O, Ruohomäki K, et al. The recent northward expansion of *Lymantria monacha* in relation to realised changes in temperatures of different seasons. *Forest Ecology and Management*. 2018;427:96-105.

19. Ammuset T, Kaukoranta T, Saikkonen K, Repo T, Klemola T. Invading and resident defoliators in a changing climate: Cold tolerance and predictions concerning extreme winter cold as a range-limiting factor. *Ecological Entomology*. 2012;37:212-220.
20. Jepsen JU, Hagen SB, Ims RA, Yoccoz NG. Climate change and outbreaks of the geometrids *Operophtera brumata* and *Epirrita autumnata* in sub-arctic birch forest: Evidence of a recent outbreak range expansion. *Journal of Animal Ecology*. 2008;77:257-264.
21. Jepsen JU, Hagen SB, Karlsen SR, Ims RA. Phase-dependent outbreak dynamics of geometrid moth linked to host plant phenology. *Proceedings of the Royal Society of London B, Biological Sciences*. 2009;276:4119-4128.
22. Moraal LG, Jagers op Akkerhuis GAJM. Changing patterns in insect pests on trees in the Netherlands since 1946 in relation to human induced habitat changes and climate factors – an analysis of historical data. *Forest Ecology and Management*. 2011;261:50-61.
23. Kaukonen M, Ruotsalainen AL, Wali PR, et al. Moth herbivory enhances resource turnover in subarctic mountain birch forests? *Ecology*. 2013;94:267-272.
24. Jepsen JU, Biuw M, Ims RA, et al. Ecosystem impacts of a range expanding forest defoliator at the forest-tundra ecotone. *Ecosystems*. 2013;16:561-575.
25. Tenow O. The outbreaks of *Operinia autumnata* bkh. and *Operophtera* spp. (Lep., Geometridae) in the Scandinavian mountain chain and northern Finland 1862-1968. *Zoologiska Bidrag från Uppsala*. 1972;2:1-107.
26. Virtanen T, Neuvonen S. Performance of moth larvae on birch in relation to altitude, climate, host quality and parasitoids. *Oecologia*. 1999;120:92-101.

27. Toigo M, Barraquand F, Barnagaud JY, Piou D, Jactel H. Geographical variation in climatic drivers of the pine processionary moth population dynamics. *Forest Ecology and Management*. 2017;404:141-155.
28. Battisti A, Stastny M, Buffo E, Larsson S. A rapid altitudinal range expansion of the pine processionary moth produced by the 2003 climatic anomaly. *Global Change Biology*. 2006;12(4):662-671.
29. Buffo E, Battisti A, Stastny M, Larsson S. Temperature as a predictor of survival of the pine processionary moth in the italian alps. *Agricultural and Forest Entomology*. 2007;9:65-72.
30. Robinet C, Baier P, Pennerstorfer J, Schopf A, Roques A. Modelling the effects of climate change on the potential feeding activity of *thaumetopoea pityocampa* (den. & schiff.) (lep. notodontidae) in france. *Global Ecology and Biogeography*. 2007;16(4):460-471.
31. Stastny M, Battisti A, Petrucco-Toffolo E, Schlyter F, Larsson S. Host-plant use in the range expansion of the pine processionary moth, *thaumetopoea pityocampa*. *Ecological Entomology*. 2006;31:481-490.
32. Boman S, Grapputo A, Lindström L, Lyttinen A, Mappes J. Quantitative genetic approach for assessing invasiveness: Geographic and genetic variation in life-history traits. *Biological Invasions*. 2008;10:1135-1145.
33. Valosaari K, Aikio S, Kaitala V. Spatial simulation model to predict the colorado potato beetle invasion under different management strategies. *Annales Zoologici Fennici*. 2008;45:1-14.
34. Jönsson AM, Pulatov B, Linderson M, Hall K. Modelling as a tool for analyzing the temperature-dependent future of the colorado potato beetle in europe. *Global Change Biology*. 2013;19:1043-1055.

35. Lehmann P, Lyytinen A, Piironen S, Lindström L. Latitudinal differences in diapause related photoperiodic responses of european colorado potato beetles (*leptinotarsa decemlineata*). *Evolutionary Ecology*. 2015;29:269-282.
36. Lehmann P, Lyytinen A, Piironen S, Lindström L. Northward range expansion requires synchronization of both overwintering behavior and physiology with photoperiod in the invasive colorado potato beetle (*leptinotarsa decemlineata*). *Oecologia*. 2014;176:57-68.
37. Wang C, Hawthorne D, Qin Y, Pan X, Li Z, Zhu S. Impact of climate and host availability on future distribution of colorado potato beetle. *Scientific Reports*. 2017;7:4489.
38. Pulatov B, Jönsson AM, Wilcke RAI, Linderson M, Hall K, Barring L. Evaluation of the phenological synchrony between potato crop and colorado potato beetle under future climate in europe. *Agriculture, Ecosystems and Environment*. 2016;224:39-49.
39. Zhang Z, Cazelles B, Tian H, Stige LC, Bräuning A, Stenseth NC. Periodic temperature-associated drought/flood drives locust plagues in china. *Proceedings of the Royal Society of London B, Biological Sciences*. 2009;276:823-831.
40. Tian H, Stige LC, Cazelles B, et al. Reconstruction of a 1,910-y-long locust series reveals consistent associations with climate fluctuations in china. *Proceedings of the National Academy of Sciences of the United States of America*. 2011;108:14521-14526.
41. Tiilikainen TM, Hokkanen HMT. Pyrethroid resistance in finnish pollen beetle (*meligethes aeneus*) populations - is it around the corner? *EPPO Bulletin*. 2008;38:99-103.
42. Hakala K, Hannukkala AO, Huusela-Veistola E, Jalli M, Peltonen-Sainio P. Pests and diseases in a changing climate: A major challenge for finnish crop production. *Agricultural and Food Science*. 2011;20:3-14.



43. Smatas R, Makunas V, Brazauskiene I, Petraitiene E. Sensitivity of pollen beetle (*Meligethes aeneus* F.) to insecticides with different modes of action and their efficacy in the field conditions. *Zemdirbyste-Agriculture*. 2012;99:197-202.
44. Coulson SJ, Hodkinson ID, Webb NR, Mikkola K, Harrison JA, Pedgley DE. Aerial colonization of high arctic islands by invertebrates: The diamondback moth *Plutella xylostella* (Lepidoptera: Yponomeutidae) as a potential indicator species. *Diversity and Distributions*. 2002;8(6):327-334.
45. Collier R, Fellows J, Adams S, Semenov M, Thomas B. Vulnerability of horticultural crop production to extreme weather events. *Aspects of Applied Biology*. 2008;88:3-14.
46. Marchioro CA, Foerster LA. Modelling reproduction of *Plutella xylostella* L. (Lepidoptera: Plutellidae): Climate change may modify pest incidence levels. *Bulletin of Entomological Research*. 2012;102:489-496.
47. Newman JA, Gibson DJ, Parsons AJ, Thornley JHM. How predictable are aphid population responses to elevated CO<sub>2</sub>? *Journal of Animal Ecology*. 2003;72:556-566.
48. Hoover JK, Newman JA. Tritrophic interactions in the context of climate change: A model of grasses, cereal aphids and their parasitoids. *Global Change Biology*. 2004;10:1197-1208.
49. Finlay KJ, Luck JE. Response of the bird cherry-oat aphid (*Rhopalosiphum padi*) to climate change in relation to its pest status, vectoring potential and function in a crop–vector–virus pathosystem. *Agriculture, Ecosystems and Environment*. 2011;144:405-421.
50. Awmack C, Leather SR. Growth and development. In: Van Emden H, Harrington R, eds. *Aphids as crop pests*. CABI Publishing, Wallingford, Oxfordshire, UK.; 2007:13-151.

51. Davis TS, Abatzoglou J, Bosque-Pérez NA, Halbert SE, Pike K, Eigenbrode SD. Differing contributions of density dependence and climate to the population dynamics of three eruptive herbivores. *Ecological Entomology*. 2014;39:566-577.
52. Michels J, Behler R. Reproduction and development of diuraphis noxia (homoptera: Aphididae) at constant temperatures. *Journal of Economic Entomology*. 1988;81:1097-1101.
53. Paradis A, Elkington J, Hayhoe K, Buonaccorsi J. Role of winter temperature and climate change on the survival and future range expansion of the hemlock woolly adelgid (adelges tsugae) in eastern north america. *Mitigation and Adaptation Strategies for Global Change*. 2008;13(5):541-554.
54. Fitzpatrick MC, Preisser EL, Porter A, Elkington J, Ellison AM. Modeling range dynamics in heterogeneous landscapes: Invasion of the hemlock woolly adelgid in eastern north america. *Ecological Applications*. 2012;22(2):472-486.
55. McAvoy TJ, Régnière J, St-Amant R, Schneeberger NF, Salom SM. Mortality and recovery of HemlockWoolly adelgid (adelges tsugae) in response toWinter temperatures and predictions for the future. *Forests*. 2017;8:497.
56. Leppanen C, Simberloff D. Implications of early production in an invasive forest pest. *Agricultural and Forest Entomology*. 2017;19:217-224.
57. Gilioli G, Pasquali S, Parisi S, Winter S. Modelling the potential distribution of bemisia tabaci in europe in light of the climate change scenario. *Pest Management Science*. 2014;70:1611-1623.
58. Zidon R, Tsueda H, Morin E, Morin S. Projecting pest population dynamics under global warming: The combined effect of inter- and intra-annual variations. *Ecological Applications*. 2016;26:1198-1210.

59. Curnutte LB, Simmons AM, Abd-Rabou S. Climate change and *bemisia tabaci* (hemiptera: Aleyrodidae): Impacts of temperature and carbon dioxide on life history. *Annals of the Entomological Society of America*. 2014;107:933-943.
60. Musolin DL, Saulich AK. Responses of insects to the current climate changes: From physiology and behavior to range shifts. *Entomological Review*. 2012;92:715-740.
61. Musolin DL, Tougou D, Fujisaki K. Too hot to handle? phenological and life-history responses to simulated climate change of the southern stink bug *nezara viridula* (heteroptera: Pentatoidae). *Global Change Biology*. 2010;16:73-87.
62. Yamamura K, Yokozawa M, Nishimori M, Ueda Y, Yokosuka T. How to analyze long-term insect population dynamics under climate change: 50-year data of three insect pests in paddy fields. *Population Ecology*. 2006;48:31-48.
63. Lu MX, Cao SS, Liu ZX, Wang X, Du YZ. Heat tolerance of developmental and seasonal stages of *chilo suppressalis*. *Entomologia Experimentalis et Applicata*. 2014;152:91-99.
64. Onstad DW, Brewer EF. Modeling induction of diapause in north american *ostrinia nubilalis* (lepidoptera: Pyralidae) populations. *Environmental Entomology*. 1996;25(5):1140-1146.
65. Trnka M, Musk F, Semeradova D, Dubrovsky M, Kocmankova E, Xalud Z. European corn borer life stage model: Regional estimates of pest development and spatial distribution under present and future climate. *Ecological Modelling*. 2007;207:61-84.
66. Maiorano A, Bregaglio S, Donatelli M, Fumagalli D, Zucchini A. Comparison of modeling approaches to simulate the phenology of the european corn borer under future climate scenarios. *Ecological Modelling*. 2012;245:65-74.

67. Radin Z. Population dynamics of the european corn borer (*ostrinia nubilalis* hbn.) in the north-west of backa in the period 1979-1988. *Zastita Bilja*. 1990;41:151-163.
68. Keszthelyi S, Nowinsky L, Puskas J. The growing abundance of *helicoverpa armigera* in hungary and its areal shift estimation. *Central European Journal of Biology*. 2013;8:756-764.
69. Lu M, Cao S, Du Y, Liu Z, Liu P, Li J. Diapause, signal and molecular characteristics of overwintering *chilo suppressalis* (insecta: Lepidoptera: Pyralidae). *Scientific Reports*. 2013;3:3211.
70. Kriticos DJ, Ota N, Hutchison WD, et al. The potential distribution of invading *helicoverpa armigera* in north america: Is it just a matter of time? *PLoS ONE*. 2015;10(7):e0133224.
71. Ouyang F, Hui C, Ge S, et al. Weakening density dependence from climate change and agricultural intensification triggers pest outbreaks: A 37-year observation of cotton bollworms. *Ecology and Evolution*. 2014;4(3362):3374.
72. Kiritani K. Predicting impacts of global warming on population dynamics and distribution of arthropods in japan. *Population Ecology*. 2006;48:5-12.
73. Ouyang F, Hui C, Men X, et al. Early eclosion of overwintering cotton bollworm moths from warming temperatures accentuates yield loss in wheat. *Agriculture, Ecosystems and Environment*. 2016;217:89-98.
74. Dhaliwal GS, Vikas J, Dhawan AK. Insect pest problems and crop losses: Changing trends. *Indian Journal of Ecology*. 2010;37:1-7.
75. Cudmore TJ, Björklund N, Carroll AL, Lindgren BS. Climate change and range expansion of an aggressive bark beetle: Evidence of higher beetle reproduction in naive host tree populations. *Journal of Applied Ecology*. 2010;47:1036-1043.

76. Raffa KF, Powell EN, Townsend PA. Temperature-driven range expansion of an irruptive insect heightened by weakly coevolved plant defenses. *Proceedings of the National Academy of Sciences of the United States of America*. 2013;110(6):2193-2198.
77. Ungerer M,J., Ayres MP, Lombardero MJ. Climate and the northern distribution limits of *Dendroctonus frontalis zimmermanni* (Coleoptera: Scolytidae). *Journal of Biogeography*. 1999;26:1133-1145.
78. Williams DW, Liebhold AM. Climate change and the outbreak ranges of two north american bark beetles. *Agricultural and Forest Entomology*. 2002;4:87-99.
79. Duehl AJ, Koch FH, Hain FP. Southern pine beetle regional outbreaks modeled on landscape, climate and infestation history. *Forest Ecology and Management*. 2011;261:473-479.
80. Weed AS, Ayres MP, Hicke JA. Consequences of climate change for biotic disturbances in north american forests. *Ecological Monographs*. 2013;83(4):441-470.
81. Dodds KJ, Aoki CF, Arango-Velez A, et al. Expansion of southern pine beetle into northeastern forests: Management and impact of a primary bark beetle in a new region. *Journal of Forestry*. 2018(116):178-191.
82. Lange H, Økland B, Krokene P. Thresholds in the life cycle of the spruce bark beetle under climate change. *InterJournal*. 2006;1648:1-10.
83. Jönsson AM, Harding S, Krokene P, et al. Modelling the potential impact of global warming on *Ips typographus* voltinism and reproductive diapause. *Climatic Change*. 2011;109:695-718.
84. Økland B, Bjørnstad ON. A resource depletion model of forest insect outbreaks. *Ecology*. 2006;87(2):283-290.

85. Økland B, Christiansen E, Wollebæk G. Granbarkbillen. registrering av bestandsstørrelsene i 2009. *Oppdragsrapport fra Skog og landskap*. 2009;21.
86. Marini L, Ayres MP, Battisti A, Faccoli M. Climate affects severity and altitudinal distribution of outbreaks in an eruptive bark beetle. *Climatic Change*. 2012;115:327-341.
87. Netherer S, Matthews B, Katzensteiner K, et al. Do water-limiting conditions predispose norway spruce to bark beetle attack? *New Phytologist*. 2015;205(3):1128-1141.
88. Gutierrez AP, Ponti L, Cossu QA. Effects of climate warming on olive and olive fly (*bactrocera oleae* (gmelin)) in california and italy. *Climate Change*. 2009;95:195-217.
89. Ponti L, Gutierrez AP, Ruti PM, Dell'Aquila.A. Fine-scale ecological and economic assessment of climate change on olive in the mediterranean basin reveals winners and losers. *Proceedings of the National Academy of Sciences of the United States of America*. 2014;111(15):5598-5603.
90. Marchi S, Guidotti D, Ricciolini M, Petacchi R. Towards understanding temporal and spatial dynamics of *bactrocera oleae* (rossi) infestations using decade-long agrometeorological time series. *International Journal of Biometeorology*. 2016;60:1681-1694.
91. Rafoss T, Saethre M. Spatial and temporal distribution of bioclimatic potetial for the codling moth and the colorado beetle in norway: Model predictions versus climate and field data from the 1990s. *Agricultural and Forest Meteorology*. 2003;5:75-85.
92. Sheldeshova GG. Ecological factors determining distribution of the codling moth, *laspeyresia pomonella* L. (lepidoptera: Tortricidae) in northern and southern hemispheres. *Entomological Review*. 1967;46:349-361.
93. Willett MJ, Neven L, Miller CE. The occurrence of codling moth in low latitude countries: Validation of pest distribution reports. *HortTechnology*. 2009;19:633-637.

94. Luedeling E, Steinmann KP, Zhang M, Brown PH, Grant J, Girvetz EH. Climate change effects on walnut pests in california. *Global Change Biology*. 2011;17:228-238.
95. Stoeckli S, Hirschi M, Spirig C, Calanca P, Rotach MW, Samietz J. Impact of climate change on voltinism and prospective diapause induction of a global pest insect - cydia pomonella (L.). *PLoS ONE*. 2012;7:e35723.
96. Jaramillo J, Chabi-Olaye A, Kamonjo C, et al. Thermal tolerance of the coffee berry borer hypothenemus hampei: Predictions of climate change impact on a tropical insect pest. *PLoS ONE*. 2009;4:e6487.
97. Jaramillo J, Muchugu E, Vega FE, Davis A, Borgemeister C. Some like it hot: The influence and implications of climate change on coffee berry borer (hypothenemus hampei) and coffee production in east africa. *PLoS ONE*. 2011;6:e24528.
98. Mendesil E, Jembere B, Seyoum E. Occurrence of coffee berry borer hypothenemus hampei (ferrari) (coleoptera: Scolytidae) on coffea arabica L. in ethiopia. *Ethiopian Journal of Biological Science*. 2003;2:61-72.
99. Miller N, Estoup A, Toepfer S, et al. Multiple transatlantic introductions of the western corn rootworm. *Science*. 2005;310:992-992.
100. Ciosi M, Miller NJ, Kim KS, Giordano R, Estoup A, Guillemaud T. Invasion of europe by the western corn rootworm, diabrotica virgifera virgifera: Multiple transatlantic introductions with various reductions of genetic diversity. *Molecular Ecology*. 2008;7:3614-3627.
101. Bermond G, Ciosi M, Lombaert E, et al. Secondary contact and admixture between independently invading populations of the western corn rootworm, diabrotica virgifera virgifera in europe. *PLoS ONE*. 2012;7:e50129.

102. Hamilton JG, Dermody O, Aldea M, et al. Anthropogenic changes in tropospheric composition increase susceptibility of soybean to insect herbivory. *Environmental Entomology*. 2005;34:479-485.
103. Zavala JA, Casteel CL, DeLucia EH, Berenbaum MR. Anthropogenic increase in carbon dioxide compromises plant defense against invasive insects. *Proceedings of the National Academy of Sciences of the United States of America*. 2008;105:5129-5133.
104. O'Neill BF, Zangerl AR, DeLucia EH, Berenbaum MR. Longevity and fecundity of japanese beetle (*popillia japonica*) on foliage grown under elevated carbon dioxide. *Environmental Entomology*. 2008;37:601-607.
105. Dermody O, O'Neill BF, Zangerl AR, Berenbaum MR, DeLucia EH. Effects of elevated CO<sub>2</sub> and O<sub>3</sub> on leaf damage and insect abundance in a soybean agroecosystem. *Arthropod-Plant Interactions*. 2008;2:125-135.
106. Lemoine NP, Drews WA, Burkepille DE, Parker JD. Increased temperature alters feeding behavior of a generalist herbivore. *Oikos*. 2013;122:1669-1678.
107. Niziolek OK, Berenbaum MR, DeLucia EH. Impact of elevated CO<sub>2</sub> and increased temperature on japanese beetle herbivory. *Insect Science*. 2013;20:513-523.
108. DeLucia EH, Nabity PD, Zavala JA, Berenbaum MR. Climate change: Resetting plant-insect interactions. *Plant Physiology*. 2012;160:1677-1685.
109. Dick J. Some data on the biology of the sugarcane borer (*eldana saccharina* wlk). *Proceedings of the South African Sugar Technologists' Association*. 1945;19:75-79.
110. Way MJ. A preliminary assessment of the effects of different constant temperatures on the reproduction of *eldana saccharina* (lepidoptera: Pyralidae). *Proceedings of the South African Sugar Technologists' Association*. 1994;68:16-18.



111. Atkinson PR. On the biology, distribution and natural host plants of *eldana saccharina* walker (Lepidoptera: Pyralidae). *Journal of the Entomological Society of Southern Africa*. 1980;43:171-194.
112. Kleynhans E, Conlong DE, Terblanche JS. Direct and indirect effects of development temperature on adult water balance traits of *eldana saccharina* (Lepidoptera: Pyralidae). *Journal of Insect Physiology*. 2014;68:69-75.
113. Ghini R, Hamada E, José M, Júnior P, Marengo JA. Risk analysis of climate change on coffee nematodes and leaf miner in Brazil. *Pesquisa Agropecuária Brasileira*. 2008;2:187-194.
114. Lomelí-Flores JR, Barrera JF, Bernal JS. Impacts of weather, shade cover and elevation on coffee leafminer *leucoptera coffeella* (Lepidoptera: Lyonetiidae) population dynamics and natural enemies. *Crop Protection*. 2010;29:1039-1048.
115. Overholt W, Songa J, Ofomata V, Jeske J. The spread and ecological consequences of the invasion of *chilo partellus* (Swinhoe) (Lepidoptera: Crambidae) in Africa. In: Lyons E, Miller S, eds. *Invasive species in eastern Africa: Proceedings of workshop ICIPE*. Nairobi: ICIPE Scientific Press; 2000:52-58.
116. Ong'amo OG, Le Ru BP, Dupas S, Moyal P, Calatayud P-, Silvain JF. Distribution, pest status and agro-climatic preferences of lepidopteran stem borers of maize in Kenya. *Annales de la Société Entomologique de France*. 2006;42:171-177.
117. Khadioli N, Tonnang ZEH, Muchugu E, et al. Effect of temperature on the phenology of *chilo partellus* (Swinhoe) (Lepidoptera, Crambidae); simulation and visualization of the potential future distribution of *C. partellus* in Africa under warmer temperatures through the development of life-table parameters. *Bulletin of Entomological Research*. 2014;104:809-822.

118. Harrington R, Clark SJ, Welham SJ, et al. Environmental change and the phenology of european aphids. *Global Change Biology*. 2007;13:1550-1564.
119. Bale JS, Hayward SAL. Insect overwintering in a changing climate. *The Journal of Experimental Biology*. 2010;213:980-994.
120. Weber JD, Volney JA, Spence JR. Intrinsic development rate of spruce budworm (lepidoptera:Tortricidae) across a gradient of latitude. *Environmental Entomology*. 1999;28:224-232.
121. Logan JA, Casagrande RA, Liebhold AM. Modeling environment for simulation of gypsy moth (lepidoptera: Lymantriidae) larval phenology. *Environmental Entomology*. 1991;20:1516-1525.
122. Topp W, Kirsten K. Synchronisation of pre-imaginal development and reproductive success in the winter moth, operophtera brumata L. *Journal of Applied Entomology*. 1991;111:137-146.
123. Yang S, Ruuhola T, Haviola S, Rantala MJ. Temperature as a modifier of plant–herbivore interaction. *Journal of Chemical Ecology*. 2007;33:463-475.
124. Berardi L, Branco M, Paiva MR, Santos H, Battisti A. Development time plasticity of the pine processionary moth (thaumetopoea pityocampa) populations under laboratory conditions. *Entomologia*. 2015;3:273.
125. Ferro DN, Logan JA, Voss RH, Elkington JS. Colorado potato beetle (coleoptera: Chrysomelidae) temperature-dependent growth and feeding rates. *Environmental Entomology*. 1985;14:343-348.
126. Ma S. The population dynamics of the oriental migratory locust (locusta migratoria malinensis meyen) in china. *Acta Entomologica Sinica*. 1958;8:1-40.

127. Mason PG, Olfert O, Sluchinski L, et al. Actual and potential distribution of an invasive canola pest, *meligethes viridescens* (coleoptera: nitidulidae), in canada. *The Canadian Entomologist*. 2003;135:405-413.
128. Golizadeh A, Kamali K, Fathipour Y, Abbasipour H,. Temperature-dependent development of diamondback moth, *plutella xylostella* (lepidoptera: Plutellidae) on two brassicaceous host plants. *Insect Science*. 2007;14:309-316.
129. Asin A, Pons X. Effect of high temperature on the growth and reproduction of corn aphids (homoptera: Aphididae) and implications for their population dynamics on the northeastern iberian peninsula. *Environmental Entomology*. 2001;30:1127-1134.
130. Dean G. Effect of temperature on the cereal aphids *metopolophium dirhodum* (wlk.), *rhopalosiphum padi* (L.) and *macrosiphum avenue* (F.) (hem., aphididae). *Bulletin of Entomological Research*. 1974;63:401-409.
131. Michels GJ, Behle RW. Influence of temperature on reproduction, development and intrinsic rate of increase of russian wheat aphid, greenbug, and bird cherry-oat aphid (homoptera: Aphididae). *Journal of Economic Entomology*. 1989(82):439-444.
132. Merrill SC, Holtzer TO, Peairs FB. *Diuraphis noxia* reproduction and development with a comparison of intrinsic rates of increase to other important small grain aphids: A meta-analysis. *Environmental Entomology*. 2009;38:1061-1068.
133. Han E, Choi B, Lee J. Temperature-dependent development models of *bemisia tabaci* (gennadius) (hemiptera: Aleyrodidae) Q biotype on three host plants. *Journal of Asia-Pacific Entomology*. 2013;16:5-10.
134. Guo J, Cong L, Wan F. Multiple generation effects of high temperature on the development and fecundity of *bemisia tabaci* (gennadius) (hemiptera: Aleyrodidae) biotype B. *Insect Science*. 2013;20:541-549.

135. Simmons AM, Yeargan KV. Development and survivorship of the green stink bug *acrosternum hilare* (hemiptera: Pentatomidae) on soybean. *Environmental Entomology*. 1988;17:527-532.
136. Fu D, He H, Zou C, Xiao H, Xue F. Life-history responses of the rice stem borer *chilo suppressalis* to temperature change: Breaking the temperature–size rule. *Journal of Thermal Biology*. 2016;16:115-118.
137. Got B, Labatte JM, Piry S. European corn borer (lepidoptera: Pyralidae) development time model. *Environmental Entomology*. 1996;25:310-320.
138. Mironidis GK, Savopoulou-Soultani M. Development, survivorship, and reproduction of *helicoverpa armigera* (lepidoptera: Noctuidae) under constant and alternating temperatures. *Environmental Entomology*. 2008;37:16-28.
139. Bentz BJ, Logan JA, Amman GD. Temperature-dependent development of the mountain pine beetle (coleoptera: Scolytidae) and simulation of its phenology. *The Canadian Entomologist*. 1991;123:1083-1094.
140. Wagner TL, Gagne JA, Sharpe PJH, Coulson RH. A biophysical model of southern pine beetle, *dendroctonus frontalis zimmermann* (coleoptera scolytidae), development. *Ecological Modelling*. 1984;21:125-147.
141. Baier P, Pennerstorfer J, Schopf A. PHENIPS-A comprehensive phenology model of *ips typographus* (L.) (col., scolytinae) as a tool for hazard rating of bark beetle infestation. *Forest Ecology and Management*. 2007;249:171-186.
142. Wermelinger B, Seifert M. Analysis of the temperature dependent development of the spruce bark beetle *ips typographus* (L) (col., scolytidae). *Journal of Applied Entomology*. 1998;122:185-191.

143. Gutierrez AP, Ponti L, Cossu QA. Effects of climate warming on olive and olive fly (*bactrocera oleae* (gmelin)) in california and italy. *Climatic Change*. 2009;95:195-217.
144. Girolami V. Studies on the biology and population ecology of *dacus oleae* (gmelin). I. influence of environmental abiotic factors on the adult and on the immature stages. *Redia*. 1979;62:147-191.
145. Aghdam HR, Fathipour Y, Radjabi G, Rezapanah M. Temperature-dependent development and temperature thresholds of codling moth (lepidoptera: Tortricidae) in iran. *Environmental Entomology*. 2009:885-895.
146. Schaafsma A, Whitfield G, Ellis C. A temperature-dependent model of egg development of the western corn rootworm, *diabrobica virgifera virgifera* leconte (coleoptera: Chrysomelidae). *The Canadian Entomologist*. 1991;123:1183-1197.
147. Ludwig D. The effects of temperature on the development of an insect (*popillia japonica* newman). *Physiological Zoology*. 1928;1:358-389.
148. Kleynhans E, Barton MG, Conlong DE, Terblanche JS. Population dynamics of *eldana saccharina* walker (lepidoptera: Pyralidae): Application of a biophysical model to understand phenological variation in an agricultural pest. *Bulletin of Entomological Research*. 2017:1-12.
149. Katiyar KP, Ferrer F. Rearing technique, biology and sterilization of the coffee leaf miner, *leucotpera coffeella* guer. (lepidoptera: Lyonetiidae). In: IAEA, ed. *Isotopes and radiation in entomology*. Vienna, Austria: IAEA; 1968:167-179.
150. O'Neal MJ, Headrick DH, Montez GH, Grafton-Cardwell EE. Temperature thresholds and degree-day model for *marmara gulosa* (lepidoptera: Gracillariidae). *Journal of Economic Entomology*. 2011;104:1286-1293.

151. Elekcioglu NZ, Uygun E. The parasitoid complex of the citrus leafminer, *phyllocnistis citrella* stainton (lepidoptera: Gracillariidae) in the east mediterranean region of turkey and their role in biological control. *Turkish Journal of Zoology*. 2006;30:155-160.

152. Tamiru A, Getu E, Jembere B, Bruce T. Effect of temperature and relative humidity on the development and fecundity of *chilo partellus* (swinhoe) (lepidoptera: Crambidae). *Bulletin of Entomological Research*. 2012;102:9-15.

153. Dhillon MK, Hasan F. Temperature-dependent development of diapausing larvae of *chilo partellus* (swinhoe) (lepidoptera: Crambidae). *Journal of Thermal Biology*. 2017;69:213-220.

154. Liu S, Meng X. Modelling development time of *myzus persicae* (hemiptera: Aphididae) at constant and natural temperatures. *Bulletin of Entomological Research*. 1999;89:53-63.

1 **Supplement 2**

2

3 **Complex responses of global insect pests to climate change**

4

5 Philipp Lehmann<sup>1,2\*</sup>, Tea Ammunét<sup>3†</sup>, Madeleine Barton<sup>4†</sup>, Andrea Battisti<sup>5†</sup>, Sanford  
6 D. Eigenbrode<sup>6†</sup>, Jane Uhd Jepsen<sup>7†</sup>, Gregor Kalinkat<sup>8†</sup>, Seppo Neuvonen<sup>9†</sup>, Pekka  
7 Niemelä<sup>10†</sup>, Bjørn Økland<sup>11†</sup>, John S. Terblanche<sup>4†</sup>, Christer Björkman<sup>3</sup>

8

9 <sup>1</sup>Department of Zoology, Stockholm University, Sweden. <sup>2</sup>Centre of Excellence in  
10 Biological Interactions Research, Department of Biological and Environmental  
11 Science, University of Jyväskylä, Finland. <sup>3</sup>Department of Ecology, Swedish  
12 University of Agricultural Sciences, Sweden. <sup>4</sup>Centre for Invasion Biology,  
13 Department of Conservation Ecology and Entomology, Stellenbosch University,  
14 South Africa. <sup>5</sup>Department of Agronomy, Food, Natural Resources, Animals and the  
15 Environment, University of Padova, Italy. <sup>6</sup>Department of Entomology, Plant  
16 Pathology and Nematology, University of Idaho, United States of America.  
17 <sup>7</sup>Department of Arctic Ecology, Norwegian Institute for Nature Research, Norway.  
18 <sup>8</sup>Department of Biology and Ecology of Fishes, Leibniz-Institute of Freshwater  
19 Ecology and Inland Fisheries, Germany. <sup>9</sup>Natural Resources Institute Finland,  
20 Finland. <sup>10</sup>Biodiversity Unit, University of Turku, Finland. <sup>11</sup>Norwegian Institute of  
21 Bioeconomy Research, Norway.

22

23 \*Corresponding author: Philipp Lehmann, [philipp.lehmann@zoologi.su.se](mailto:philipp.lehmann@zoologi.su.se)

24 †Contributing authors listed alphabetically.

|    | <b>Surveyed pests and their responses to climate change</b> |                                                                    |      |
|----|-------------------------------------------------------------|--------------------------------------------------------------------|------|
|    | Nr.                                                         | Species                                                            | Page |
| 25 |                                                             |                                                                    |      |
| 26 |                                                             |                                                                    |      |
| 27 |                                                             |                                                                    |      |
| 28 | 1.                                                          | Eastern spruce budworm ( <i>Choristoneura fumiferana</i> )         | 3    |
| 29 | 2.                                                          | Gypsy moth ( <i>Lymantria dispar</i> )                             | 5    |
| 30 | 3.                                                          | Winter moth ( <i>Operophtera brumata</i> )                         | 7    |
| 31 | 4.                                                          | Autumnal moth ( <i>Epirrita autumnata</i> )                        | 9    |
| 32 | 5.                                                          | Pine processionary moth ( <i>Thaumetopoea pityocampa</i> )         | 11   |
| 33 | 6.                                                          | Colorado potato beetle ( <i>Leptinotarsa decemlineata</i> )        | 13   |
| 34 | 7.                                                          | Oriental migratory locust ( <i>Locusta migratoria manilensis</i> ) | 15   |
| 35 | 8.                                                          | Pollen beetle ( <i>Meligethes aeneus</i> )                         | 17   |
| 36 | 9.                                                          | Diamondback moth ( <i>Plutella xylostella</i> )                    | 19   |
| 37 | 10.                                                         | Bird cherry oat aphid ( <i>Rhopalosiphum padi</i> )                | 21   |
| 38 | 11.                                                         | Russian wheat aphid ( <i>Diuraphis noxia</i> )                     | 24   |
| 39 | 12.                                                         | Hemlock woolly adelgid ( <i>Adelges tsugae</i> )                   | 26   |
| 40 | 13.                                                         | Sweet potato whitefly ( <i>Bemisia tabaci</i> )                    | 28   |
| 41 | 14.                                                         | Southern green stink bug ( <i>Nezara viridula</i> )                | 30   |
| 42 | 15.                                                         | Asiatic rice borer ( <i>Chilo suppressalis</i> )                   | 32   |
| 43 | 16.                                                         | European corn borer ( <i>Ostrinia nubilalis</i> )                  | 34   |
| 44 | 17.                                                         | Cotton bollworm ( <i>Helicoverpa armigera</i> )                    | 36   |
| 45 | 18.                                                         | Mountain pine beetle ( <i>Dendroctonus ponderosae</i> )            | 38   |
| 46 | 19.                                                         | Southern pine beetle ( <i>Dendroctonus frontalis</i> )             | 40   |
| 47 | 20.                                                         | Eurasian spruce bark beetle ( <i>Ips typographus</i> )             | 42   |
| 48 | 21.                                                         | Olive fruit fly ( <i>Bactrocera oleae</i> )                        | 44   |
| 49 | 22.                                                         | Codling moth ( <i>Cydia pomonella</i> )                            | 46   |
| 50 | 23.                                                         | Coffee berry borer ( <i>Hypothenemus hampei</i> )                  | 48   |
| 51 | 24.                                                         | Western/Southern corn rootworm ( <i>Diabrotica virgifera</i> )     | 50   |
| 52 | 25.                                                         | Japanese beetle ( <i>Popillia japonica</i> )                       | 52   |
| 53 | 26.                                                         | African sugarcane stalk borer ( <i>Eldana saccharina</i> )         | 54   |
| 54 | 27.                                                         | Coffee leaf miner ( <i>Leucoptera coffeella</i> )                  | 56   |
| 55 | 28.                                                         | Citrus peel miner ( <i>Marmara gulosa</i> )                        | 58   |
| 56 | 29.                                                         | Citrus leaf miner ( <i>Phyllocnistis citrella</i> )                | 60   |
| 57 | 30.                                                         | Spotted stem borer ( <i>Chilo partellus</i> )                      | 62   |
| 58 | 31.                                                         | Green peach aphid ( <i>Myzus persicae</i> )                        | 64   |



59 1. Eastern spruce budworm (*Choristoneura fumiferana*) Lepidoptera: Tortricidae  
60 (Clemens 1865)

61

62 The eastern spruce budworm *Choristoneura fumiferana* is a native defoliator of  
63 North American conifer forests. The main host of the eastern spruce budworm is  
64 balsam fir, *Abies balsamea*, though it may also utilize white, red and to some  
65 extent black spruce, *Picea glauca*, *P. rubens* and *P. mariana*. The eastern spruce  
66 budworm causes considerably more damage than any other defoliating insect in  
67 North America's boreal forests (Volney and Fleming 2000). The northern range of  
68 the eastern spruce budworm is predicted to shift towards north and higher  
69 elevations under projected climate change. The expansions are predicted to be  
70 spatially non-uniform depending on the distribution of the main host species, but  
71 temperate regions are expected to be most affected (Rénier et al. 2012).  
72 Climate change and forest composition are predicted to influence the outbreak  
73 characteristics of the eastern spruce budworm in Canada (Gray et al. 2000, Gray  
74 2013). Outbreak duration has been shown to be most strongly influenced by  
75 spring accumulation of degree days and outbreak severity most influenced by the  
76 extreme maximum temperatures of spring (Gray 2013). Forest characteristics  
77 (tree species composition, basal area) influence the outbreaks duration and  
78 severity. In Pennsylvania increased temperature with increasing precipitation is  
79 predicted to increase defoliation area whereas increased temperature alone or  
80 combined with low precipitation decreased the defoliation area (Williams and  
81 Liebhold 1995).

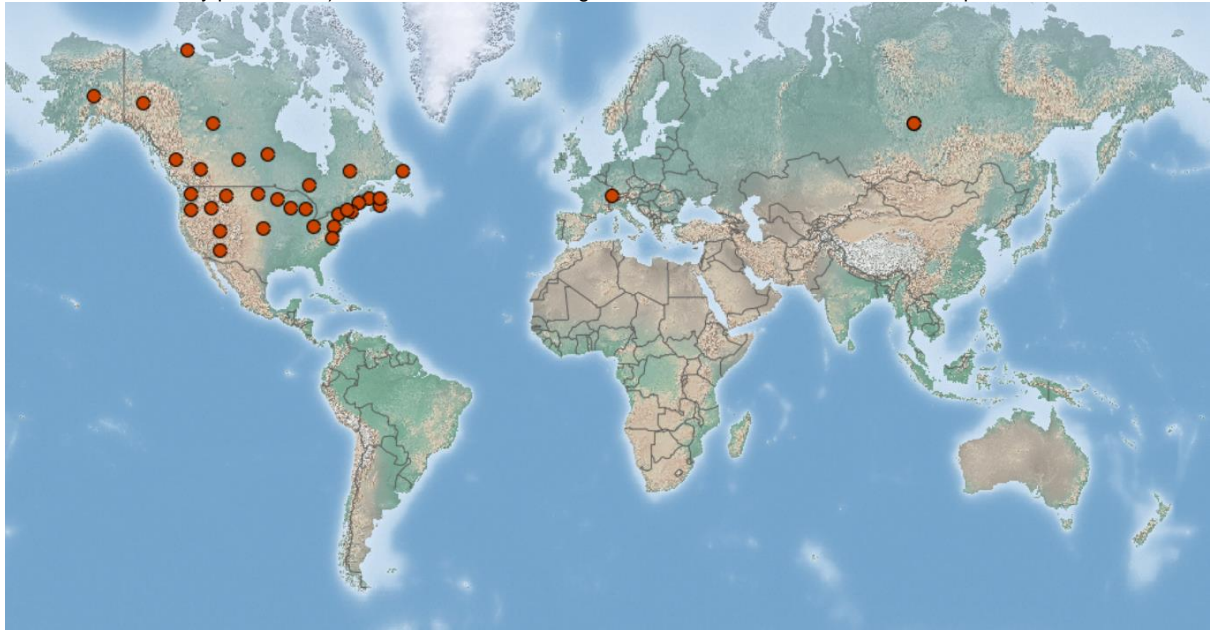

82

83

84

85

Distribution map from: CABI, 2018. *Choristoneura fumiferana*. In: Invasive Species Compendium. Wallingford, UK: CAB International. [www.cabi.org/isc](http://www.cabi.org/isc). Printed with permission.

86 2. Gypsy moth (*Lymantria dispar*) Lepidoptera: Erebidae (Linnaeus 1758)

87

88 The major insect pest of temperate central European and eastern North  
89 American forests is the gypsy moth, *Lymantria dispar*. The gypsy moth is native  
90 to southern Europe, northern Africa, central and southern Asia and Japan. The  
91 European strain has been introduced to the United States (in 1869) and Canada  
92 and is now present in most of northeastern N. America but its range is expanding  
93 to the south and west. In its caterpillar stage, the gypsy moth can feed on more  
94 than 500 different species of trees and shrubs. In N. America the preferred hosts  
95 include oak, cherry white birch, maple, alder, willow, elm and trembling aspen.  
96 Defoliations may change oak dominated forest to maple dominated forests thus  
97 causing considerable forest ecosystem changes (Fajyan and Wood 1996). In  
98 eastern N. America current climate change forecasts are expected to increase  
99 the area of climatic suitability for the gypsy moth (Regniere et al. 2009). Williams  
100 and Liebhold (1995) modeled that in Pennsylvania increased temperature alone  
101 or with increasing precipitation are expected to increase defoliation areas  
102 whereas increasing temperature with decreasing precipitation is expected to  
103 decrease defoliation area. Control of gypsy moth populations by the fungal  
104 pathogen *Entomophaga maimaiga* has decreased damage in N. America during  
105 the last decades (Oswalt & Smith 2014). In Europe climate change is expected to  
106 increase range shift towards north (e.g. Vanhanen et al. 2007, Fält-Nardmann et  
107 al. 2018a, b, c). Also Asian gypsy moth populations are modeled to have  
108 potential to expand towards north and west under changing climate (Peterson et  
109 al. 2007). Finally, the Nun moth, *Lymantria monacha*, has been shown to spread  
110 northwards in Europe probably due to increased winter survival because of  
111 reduced thermal constraints (Fält-Nardmann et al. 2018a, b).

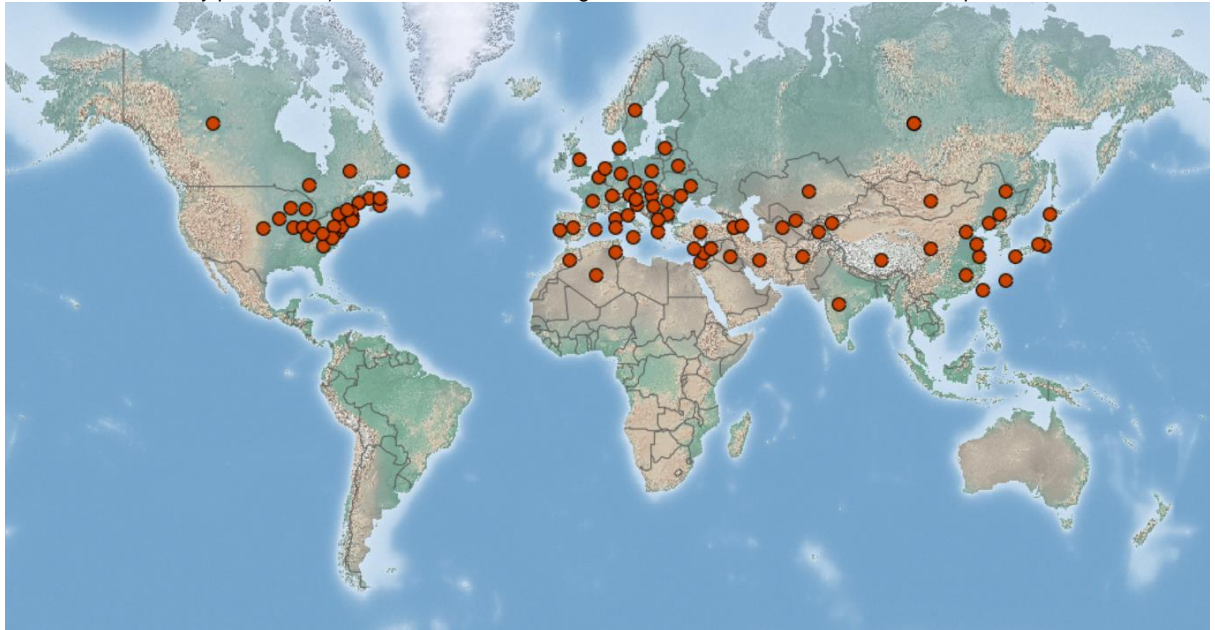

112

113

114

115

116

Distribution map from: CABI, 2018. *Lymantria dispar*. In: Invasive Species Compendium. Wallingford, UK: CAB International. [www.cabi.org/isc](http://www.cabi.org/isc). Printed with permission. Reviewed by: Patrick Tobin, School of Environmental and Forest Sciences, University of Washington, Seattle, USA

117 3. Winter moth (*Operophtera brumata*) Lepidoptera: Geometridae (Linnaeus  
118 1758)

119

120 The winter moth (*Operophtera brumata*) is distributed in temperate, boreal and  
121 sub-arctic forests throughout Europe, western Russia, south-east Russia and  
122 parts of Asia (Tenow 1972). In North America it has been accidentally introduced  
123 to both eastern and western Canada. From the latest introduction in Nova Scotia  
124 it has spread into the north-eastern coastal states of the US (Elkinton et al. 2014).  
125 The species is univoltine with overwintering eggs and spring-feeding larvae,  
126 which feed on a variety of mostly deciduous trees. In northern regions it displays  
127 a pronounced cyclic dynamics with decadal outbreaks of varying amplitude. In  
128 temperate Europe the winter moth is an important pest in orchards and natural  
129 oak forest, while in northern Fennoscandia, outbreaks by winter moth and  
130 autumnal moth (see elsewhere) have defoliated 1 mill ha of birch forest during  
131 the 2000's (Jepsen et al. 2009a) and caused ecosystem levels changes in the  
132 birch forest system (Jepsen et al. 2013, Kaukonen et al. 2013). At its northern  
133 range the winter moth has spread northwards and inland during the last few  
134 decades (Jepsen et al. 2008) probably due both to a release from climatic  
135 constraints on eggs survival in winter (Ammunet et al. 2012), and a better  
136 phenological synchrony with the main host tree, mountain birch (Jepsen et al.  
137 2009b). In temperate Europe, a disrupted phenological synchrony between winter  
138 moth and oak caused by warming temperatures (Visser and Holleman 2001)  
139 appears to have been restored by a hereditary change in egg hatching dates in  
140 response to the altered selection pressure . In the Netherlands observations of  
141 winter moth damage have increased over the last 50 years (Moraal & Jagers op  
142 Akkerhuis, 2011).

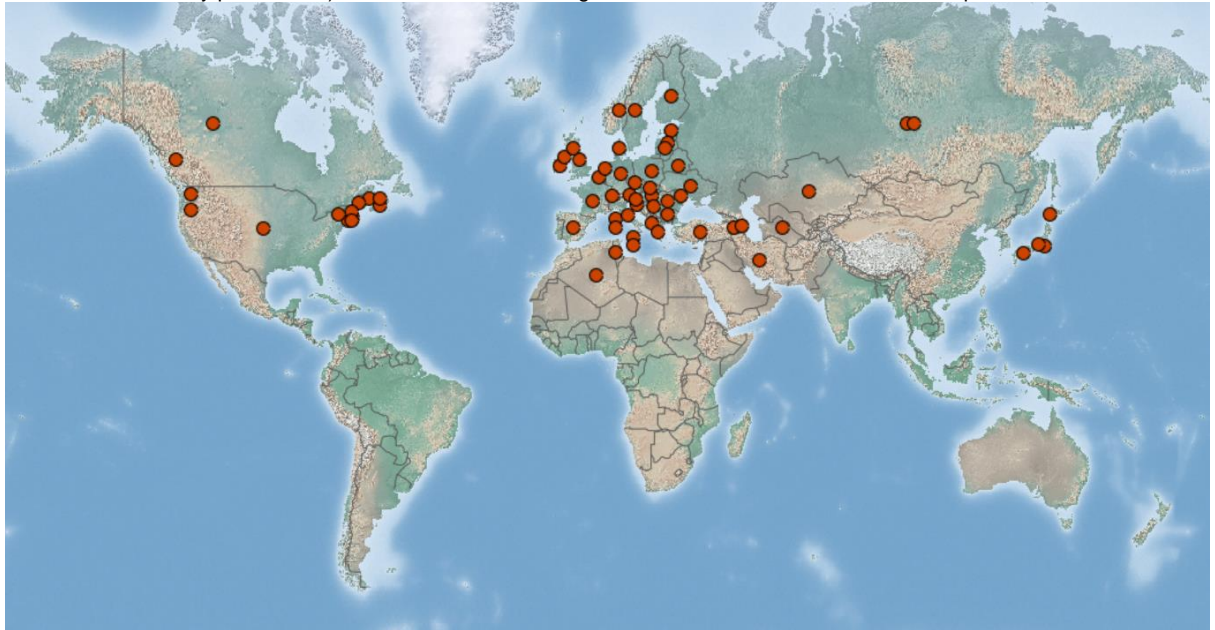

143

144

145

146

Distribution map from: CABI, 2018. *Operophtera brumata*. In: Invasive Species Compendium. Wallingford, UK: CAB International. [www.cabi.org/isc](http://www.cabi.org/isc). Printed with permission.

147 4. Autumnal moth (*Epirrita autumnata*) Lepidoptera: Geometridae (Borkhausen  
148 1794)

149

150 The autumnal moth (*Epirrita autumnata*) is distributed mainly in boreal, alpine and  
151 sub-arctic forests throughout the northern hemisphere (Tenow 1972). The  
152 species is univoltine with overwintering eggs and spring-feeding larvae, which  
153 feed on a variety of mostly deciduous trees. As the winter moth, it displays  
154 pronounced cyclic dynamics with decadal outbreaks of varying amplitude in  
155 Fennoscandia, causing large-scale and severe damage to alpine and sub-arctic  
156 mountain birch forests (Jepsen et al. 2013, Karlsen et al. 2013). At its northern  
157 range the species has recently spread into colder and more continental areas  
158 (Jepsen et al. 2008), probably due to a release from climatic constraints on egg  
159 survival in winter (Ammunet et al. 2012). The autumnal moth is a widespread  
160 species but outbreaks occur mainly near the northern margin of its distribution  
161 (Tenow 1972, Neuvonen et al. 1999). Therefore, it seems plausible that at least  
162 one reason behind this pattern is higher numbers or efficiency of natural enemies  
163 in more southern areas, and there is evidence that the efficiency of the  
164 parasitoids of the autumnal moth is higher in warmer temperatures (Virtanen &  
165 Neuvonen 1999). Finally, in a seven-year field experiment, Svensson et al.  
166 (2018) showed links between habitat warming and trophic shifts in herbivore-  
167 plant interactions leading to more severe pest outbreaks.

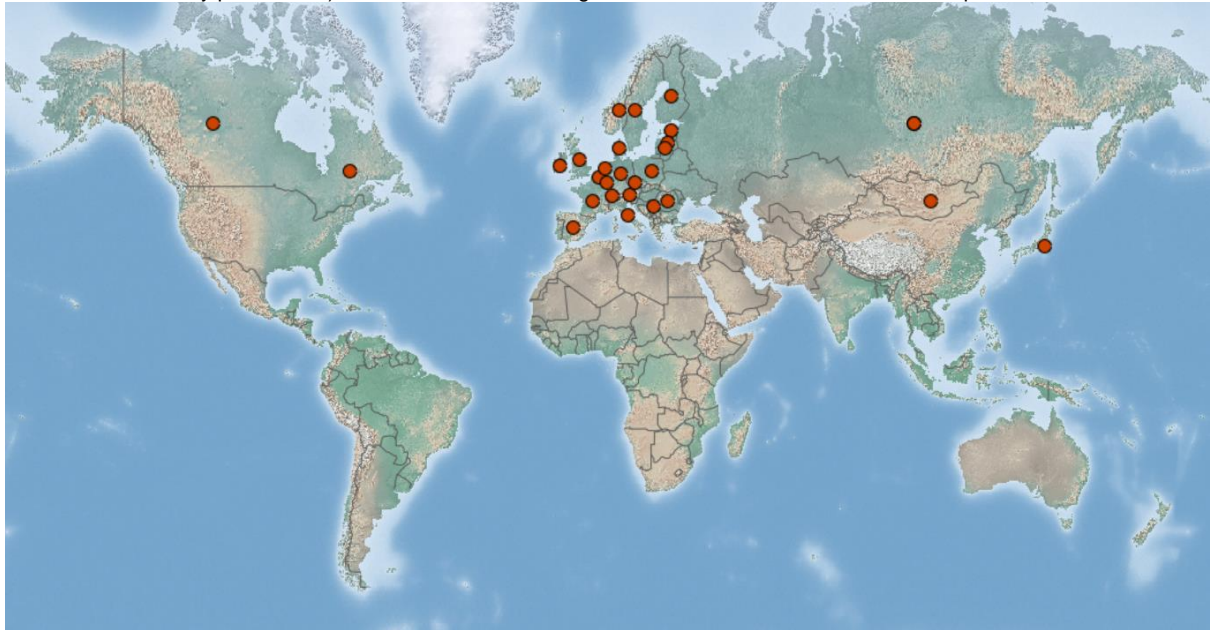

168  
169  
170  
171

Distribution map from: CABI, 2018. *Epirrita autumnata*. In: Invasive Species Compendium. Wallingford, UK: CAB International. [www.cabi.org/isc](http://www.cabi.org/isc). Printed with permission.



172 5. Pine processionary moth (*Thaumetopoea pityocampa*) Lepidoptera:  
173 Thaumetopoeidae (Denis & Shiffermüller 1775)

174

175 The pine processionary moth (*Thaumetopoea pityocampa*) native to the western  
176 Mediterranean basin (Kerdelhué et al. 2009). It is currently extending its  
177 distribution northwards and into higher elevations and breeds as far north as the  
178 Paris basin (Roques 2014). The species has a univoltine life cycle, with larvae  
179 that feed gregariously during winter on coniferous tree species. The main hosts  
180 are *Pinus* spp., in particular *P. nigra*, but the species can also attack other  
181 conifers such as *Cedrus* ssp. Adoption of new native and non-native hosts (*P.*  
182 *mugo*, *Pseudotsuga menziesii*) has been observed, although female host choice  
183 appears conservative (Stastny et al. 2006). The range expansion in pine  
184 processionary moth has been shown to be facilitated by an increase of winter  
185 temperatures, resulting in better thermal conditions for both female dispersal  
186 (Battisti et al. 2006, 2017), and for larval feeding activity in winter, the latter  
187 resulting in higher probabilities of winter survival (Battisti et al. 2005; Buffo et al.  
188 2007; Robinet et al. 2007, Toigo et al. 2017). However, accidental human-  
189 mediated dispersal is likely to have contributed to the establishment of recent  
190 pioneer colonies north of Paris and in eastern France (Robinet et al. 2012).

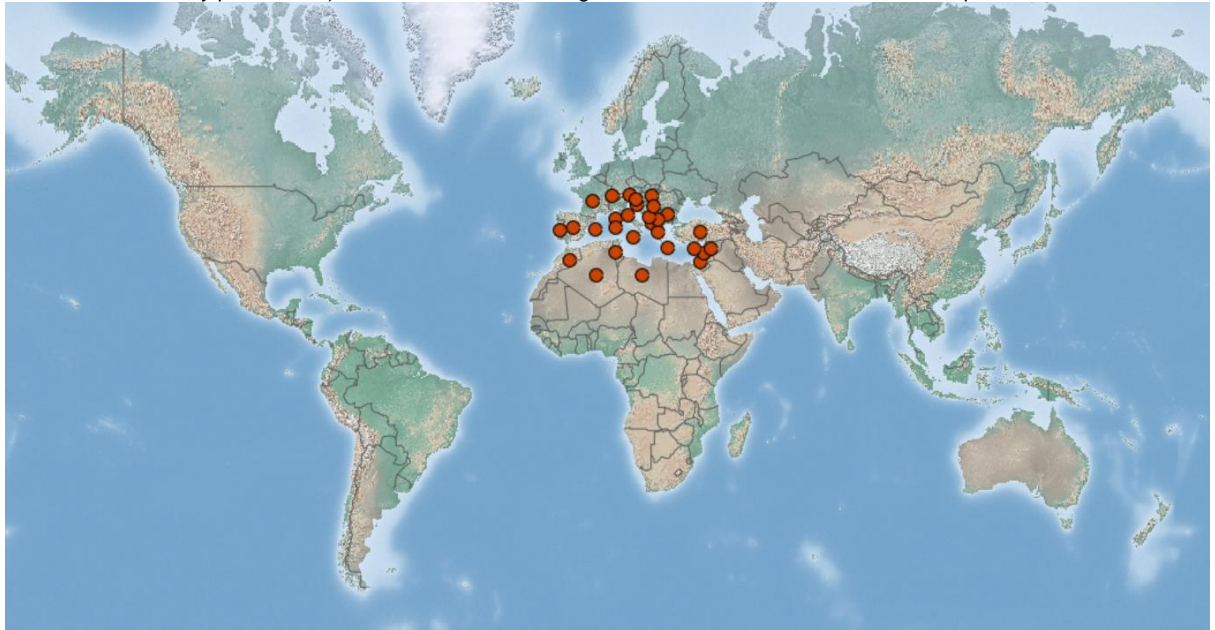

191  
192  
193  
194

Distribution map from: CABI, 2018. *Thaumetopoea pityocampa*. In: Invasive Species Compendium. Wallingford, UK: CAB International. [www.cabi.org/isc](http://www.cabi.org/isc). Printed with permission.

195 6. Colorado potato beetle (*Leptinotarsa decemlineata*) Coleoptera:  
196 Chrysomelidae (Say 1824)

197

198 The major insect pest of cultivated potato is the Colorado potato beetle,  
199 *Leptinotarsa decemlineata*. This species has spread from native habitats in  
200 northern Mexico to cover a range of over 16M km<sup>2</sup> in North America, Europe and  
201 Asia (Alyokhin 2009). The species differs in voltinism and generation time across  
202 latitude (Hsiao 1985) and increasing mean temperatures associated with climate  
203 change have been observed to increase the range of *L. decemlineata* in  
204 temperate regions, due to ecological release of thermal constraints as well as a  
205 lengthening growth season (Boman et al. 2008, Valosaari et al. 2008, Lyytinen et  
206 al. 2009, Piironen et al. 2011, Lehmann et al. 2014, 2015). The species has been  
207 shown to be able to adaptively synchronize its life-cycle with novel environments  
208 (Danilevskii 1965). However, due to the low scale of potato cultivation at higher  
209 latitudes than the current range limit, net socioeconomic effects of range  
210 expansion might be negligible. Instead a larger socioeconomic impact might be  
211 seen at lower latitudes, where the species likely instead will increase in voltinism  
212 (Jönsson et al. 2013, Pulatov et al. 2016, Wang et al. 2017). Potential  
213 desertification at low latitudes (e.g. the Mediterranean region) is unlikely to  
214 constrain *L. decemlineata* since adults can aestivate over periods of harshness  
215 during summer (Tauber et al. 1986). In conclusion, as long as the host plant is  
216 cultivated, climate change is likely to have net positive effects on *L.*  
217 *decemlineata*, leading to an increase in socioeconomic impact of this important  
218 pest species.

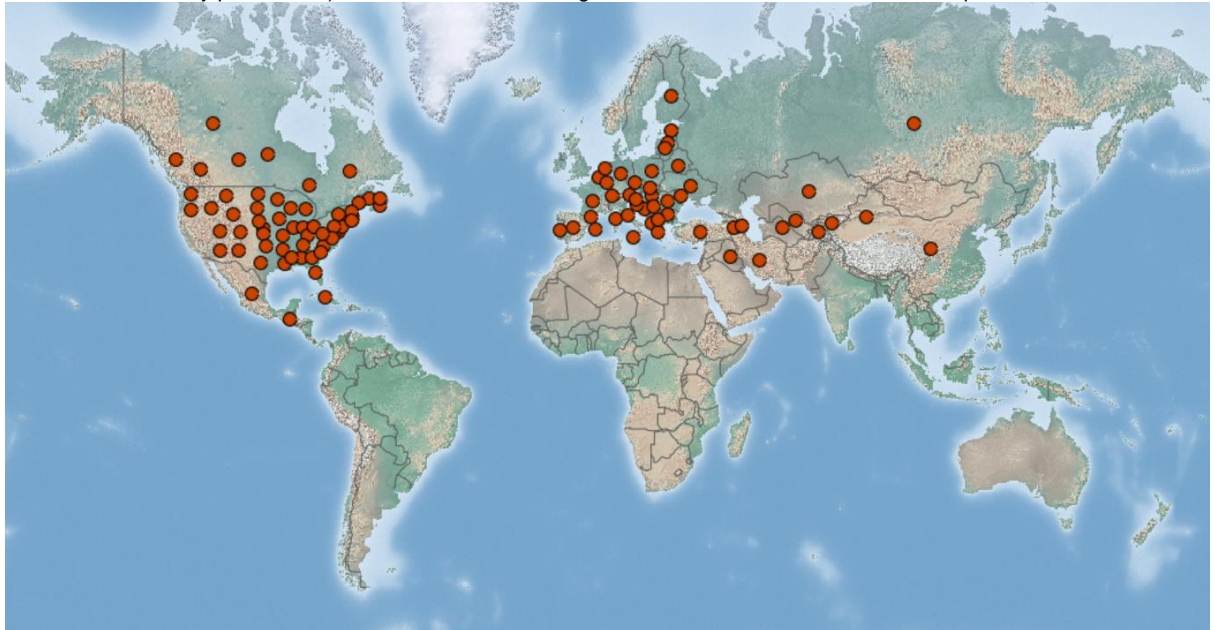

219

220

221

222

Distribution map from: CABI, 2018. *Leptinotarsa decemlineata*. In: Invasive Species Compendium. Wallingford, UK: CAB International. [www.cabi.org/isc](http://www.cabi.org/isc). Printed with permission.

223 7. Oriental migratory locust (*Locusta migratoria manilensis*) Orthoptera: Acrididae  
224 (Meyen 1835)

225

226 The migratory locust is an important polyphagous defoliator of crops occurring in  
227 a wide area across Africa, Asia, Australia, New Zealand and occasionally in  
228 Europe (e.g. Brázdil et al 2014). Due to its large geographical range the species  
229 has been divided into a number of subspecies (see Chapuis et al. 2008). In Asia  
230 the primary subspecies is *Locusta migratoria manilensis*, sometimes referred to  
231 as *L. migratoria migratorioides*, a pest with a very long history in the region  
232 (Uvarov 1936). Indeed, the first records are over 3500 years old (Tian 2011). The  
233 species is generally quite harmless and exists in low-density populations along  
234 the coastal and sub-coastal regions. However, changes in local climatic  
235 conditions can rapidly cause locusts to shift into a high-density, gregarious,  
236 migratory phase, with profound negative impact on local ecosystems (Uvarov  
237 1936). What triggers outbreaks is still a matter of debate, with on the one hand,  
238 warm temperatures and dry conditions (Ma 1958) and on the other hand,  
239 droughts/floods (Stige et al. 2007; Liu et al. 2008; Zhang et al. 2009, see also  
240 Brázdil et al. 2014 for an European example) suggested to act as outbreak  
241 triggers. Due to the long history of record-keeping in the region, Tian and  
242 colleagues (2011) correlated historical records of locust outbreaks in China with  
243 historical meteorological records and found that across a 1900-year period,  
244 outbreaks are positively associated with dry conditions and low temperatures.  
245 Since climate change scenarios in the region suggest increasing temperatures  
246 and a decreasing frequency of droughts and floods (Zhang et al. 2009) these  
247 findings suggest that net effects of climate change on the Oriental migratory  
248 locust are negative, with the pest decreasing in severity due to reduced outbreak  
249 frequency.

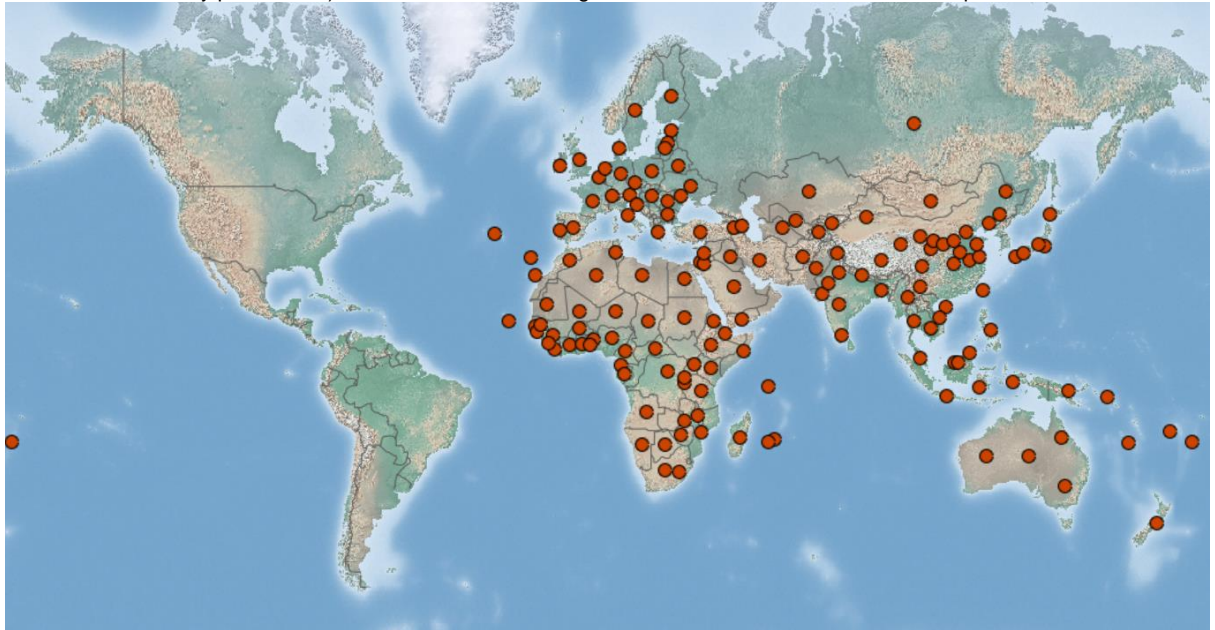

250  
251  
252  
253

Distribution map from: CABI, 2018. *Locusta migratoria*. In: Invasive Species Compendium. Wallingford, UK: CAB International. [www.cabi.org/isc](http://www.cabi.org/isc). Printed with permission.

254 8. Pollen beetle (*Meligethes aeneus*) Coleoptera: Nitidulidae (Fabricius 1775)

255

256 The rape beetle, *Meligethes aeneus* is a common beetle occurring in most of the  
257 Holarctic region (Alford 2003). It feeds on a range of naturally occurring plants,  
258 especially *Brassica* and *Sinapis* species where it is not considered particularly  
259 harmful (Alford 2003). However, since it also feeds on commercially grown rape  
260 crops, it might become a serious pest with a large regional economic impact.  
261 Populations of *M. aeneus* are generally univoltine, and adults overwinter in  
262 woodlands (Tiilikainen and Hokkanen 2008). Rape is one of the most important  
263 crop plants in Europe with a total production volume of  $19 \times 10^6$  tonnes grown  
264 during 2010-2011 in the EU (Coyette et al. 2012). An increasing utilization of rape  
265 has led to the development of winter hardy high latitude variants which can be  
266 found in northern Europe (Mäkelä et al. 2011). Increasing the growing areas of  
267 rape crops has also resulted in positive effects on *M. aeneus*, which has  
268 increased in abundance in concert with its host plant (Tiilikainen and Hokkanen  
269 2008). In case populations are not controlled, yield losses in commercial rape  
270 crops can be up to seventy percent (Nilsson 1987). Populations of *M. aeneus* are  
271 widely controlled both through biological (Veromann et al. 2006), and more  
272 commonly, chemical means (Smatas et al. 2012). Chemical management is  
273 complicated by high levels of pesticide resistance (Tiilikainen and Hokkanen  
274 2008; Smatas et al. 2012) which is exacerbated by host shifts of *M. aeneus*  
275 individuals from commercially grown rape crops to wild relatives (Hokkanen  
276 2000). The shift of host plants can increase spatial heterogeneity and contribute  
277 to the maintenance of large potential genetic variation in the populations. The  
278 effect of climate change is difficult to estimate in *M. aeneus* since this univoltine  
279 species already has a more northern distribution than its crop host plants.  
280 Therefore climate change effects will likely act indirectly as warming affects the  
281 range of its host plant if rape is going to be cultured at higher latitudes and in  
282 larger areas. According to Bebber et al. (2013) *M. aeneus* has not shifted or  
283 enlarged its range during the last 60 years; however its severity has increased,  
284 primarily through an enlargement of host plant planting areas and increasing  
285 pesticide resistance (Tiilikainen and Hokkanen 2008; Smatas et al. 2012).  
286 According to Hakala et al. (2011) climate change might make cultivation of  
287 different rape variants possible even above the Arctic Circle (65°N). If this is the  
288 case, *M. aeneus* most likely will transition along with its host, and further increase  
289 in severity as pest. A similar scenario has been outlined for the bean beetle  
290 *Cerotoma trifurcata*, where it is the response of the primary host, *Glycine max*, to  
291 climate change, that will determine the changes of the pest as well (Berzitis et al.  
292 2014).

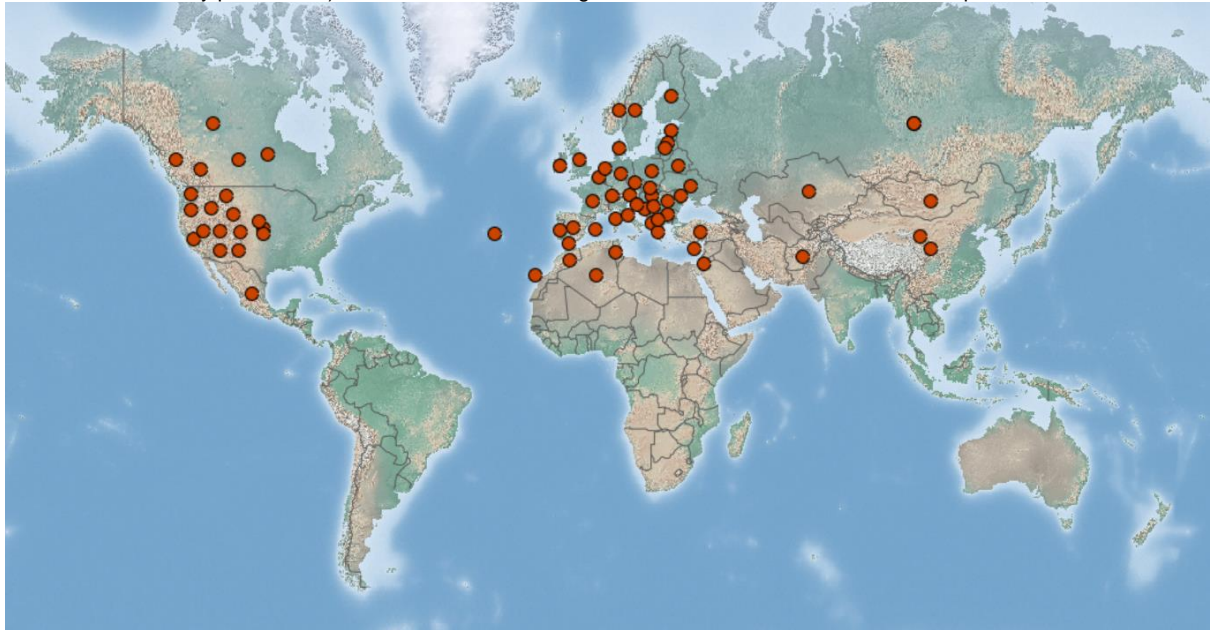

293

294

295

296

Distribution map from: CABI, 2018. *Meligethes aeneus*. In: Invasive Species Compendium. Wallingford, UK: CAB International. [www.cabi.org/isc](http://www.cabi.org/isc). Printed with permission.



297 9. The diamondback moth (*Plutella xylostella*) Lepidoptera: Plutellidae (Linnaeus  
298 1758)

299

300 The diamondback moth (*Plutella xylostella*) has an European origin, but has now  
301 spread all over the world where its Brassicaceae hosts are cultivated or it can  
302 feed on native Brassicaceae plants (Talekar & Shelton 1993). This  
303 microlepidopteran starts its lifecycle as a leaf miner in the first two instars, after  
304 which it is a free-moving defoliator. The larvae cause severe damage on flowers,  
305 leaves, buds and seed pods (siliquae) when numerous and management costs  
306 are estimated to be between 4 and 5 billion USD per year (Zalucki et al. 2012).  
307 The diamondback moth is the first crop pest known to have developed resistance  
308 against DDT. It is also the first insect known to develop resistance against  
309 biological control by Bt toxin (*Bacillus thuringiensis*) (Shelton et al. 1993, Talekar  
310 & Shelton 1993). The thermal developmental range is very wide (4-37°C) and in  
311 the tropics and subtropics the diamondback moth occurs throughout the year  
312 (Zalucki et al. 2011; Li et al. 2012, Marchioro & Foerster 2012; Nguyen et al.  
313 2014, Li et al. 2016). The number of generations is dependent on temperature  
314 and varies from 4 in the northern latitudes to 12 in the south. The high number of  
315 generations has probably influenced the development of resistance. Migration  
316 and southern air currents allow the species to be found all the way up to Svalbard  
317 (Coulson et al. 2002) and yearly migration (exceeding 3000 km) allows for  
318 growing season invasions in areas too cold during the winter while the moth  
319 overwinters in more southern areas (Doddall et al. 2001; Chapman et al. 2002;  
320 Gu, 2009; Wei et al. 2013). Drought has a positive effect on the diamondback  
321 moth survival (Talekar, Lee & Huang 1988; [http://eap.mcgill.ca/CPCM\\_3.htm](http://eap.mcgill.ca/CPCM_3.htm)).  
322 While a modeling study suggested an increase in voltinism over time in several  
323 replicated locations at the northern range limit of the species with increasing  
324 temperature (Collier et al. 2008), a similar study at tropical latitudes suggested  
325 more variable, both severity increasing and decreasing effects (Ngowi et al.  
326 2017).

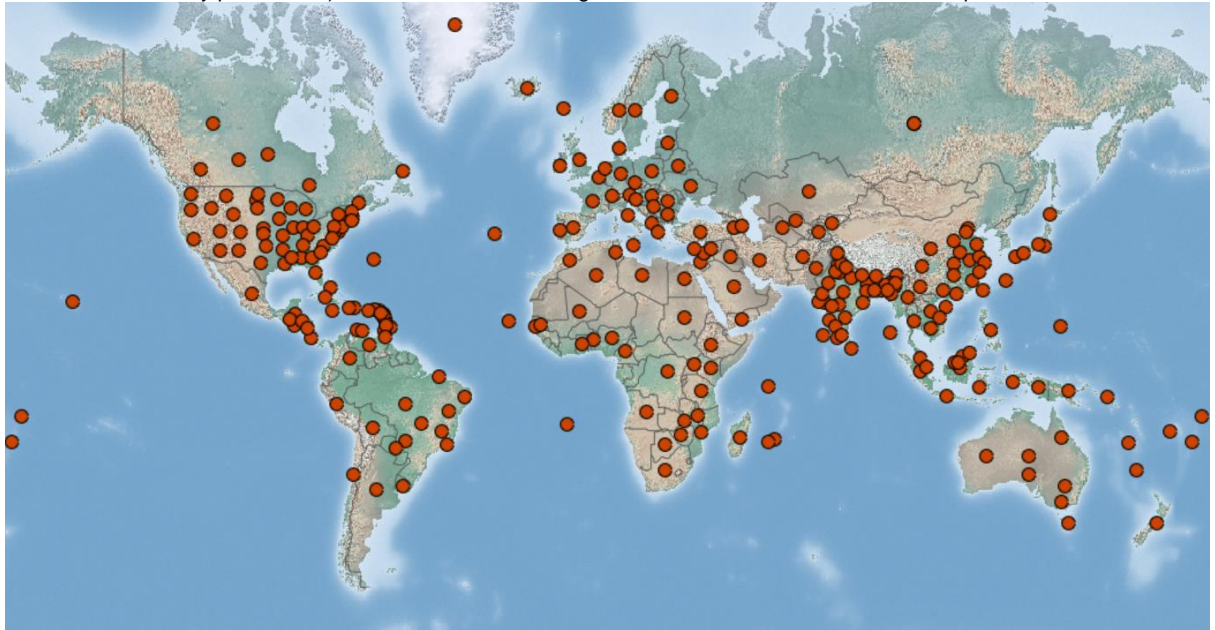

327

328

329

330

331

332

Distribution map from: CABI, 2018. *Plutella xylostella*. In: Invasive Species Compendium. Wallingford, UK: CAB International. [www.cabi.org/isc](http://www.cabi.org/isc). Printed with permission. Reviewed by: Rana M. Sarfraz, Department of Zoology, Biodiversity Research Centre, The University of British Columbia, 4200-6270 University Blvd., Vancouver, British Columbia, Canada V6T 1Z4

333 10. Bird cherry oat aphid (*Rhopalosiphum padi*) Hemiptera: Aphididae (Linnaeus  
334 1758)

335

336 The bird cherry oat aphid *Rhopalosiphum padi* is a principal pest and vector of  
337 *Barley yellow dwarf virus* in wheat and other cereals in UK, NA, Europe, but also  
338 attacks other plant species. The species is thought to have originated in North  
339 America (Halbert & Voegtlin 1998), but now has a cosmopolitan distribution. It is  
340 one of the 14 most important aphid species worldwide because of its impacts on  
341 globally significant staple grasses. As a result it has been extensively studied on  
342 various aspects of its biology. Across this range it is primarily heteroecious  
343 holocyclic with the predominant primary host *Prunus padus* or other *Prunus*  
344 species, but where winters are mild and primary hosts rare, it is anholocyclic,  
345 moving from wild grasses to cultivated cereals (Williams and Dixon 2007). Its  
346 pest status is amplified in some regions where it is a vector of viruses affecting  
347 noncereals, potato, where its transient movements and transient feeding makes  
348 is a vector for Potato virus Y (Katis and Gibson 1985). Outside of cropping  
349 systems, the ecological impact of the bird cherry oat aphid is likely minimal.  
350 Nonetheless as a vector of cereal yellow dwarf viruses, it contributes to complex  
351 interactions among competing grasses, including invasive and native ones  
352 (Malmstrom et al. 2006). In many areas, these viruses can readily be found in  
353 perennial grasses (Ingwell et al. 2012) with implications for the functioning of  
354 these systems. Potentially, the bird cherry oat aphid could respond to climate  
355 change directly, due to the constraints of its optimal thermal range and indirectly  
356 due to changes in the quality of its host plants under climate related stress, or  
357 changes in its natural enemy complex. Finally, climatic conditions could influence  
358 the bird cherry oat aphid as a vector of viruses. As is true for most aphid species  
359 (Awmack and Leather, 2007), increases in temperature accelerates development  
360 and the potential number of generations that can be achieved within a single  
361 growing season. A number of laboratory studies have delineated the temperature  
362 envelope for the bird cherry oat aphid (reviewed in Finlay and Luck 2011). There  
363 appears to be an optimum near 26°C, above which development is retarded and  
364 below which it declines to around 10°C. Developmental thresholds range  
365 between 4° and 6°C. Thus, as climates in particular regions warm, as is generally  
366 projected, the aphid could exhibit extended seasons of viability and more rapid  
367 growth where lower temperatures are currently limiting, and reductions where  
368 higher temperatures are limiting. Since there is considerable variation among  
369 clones of bird cherry oat aphid that have been investigated in the laboratory (e.g.  
370 Valenzuela et al. 2008), the potential responses to climate trends are difficult to  
371 project. Despite several laboratory studies of bird cherry oat aphid responses to  
372 climatic drivers, and the significance of this aphid as a pest worldwide, there are  
373 few studies and no evidence that its populations respond to documented trends  
374 in temperature or other drivers (Newman et al. 2003; Hoover and Newman 2004,  
375 but see Andrade et al. 2016). In the Pacific Northwest of the USA, a network of  
376 28 suction traps acquired extensive data on flights and inferred abundance of bird

377 cherry oat aphid abundances over a 17-year trapping period. Interannual  
378 abundance exhibited evidence for biotic feedback, but was unrelated to trends or  
379 variability in temperature and precipitation throughout the sampled period (Davis  
380 et al. 2014). In Sweden, trends in temperature and precipitation explained a small  
381 amount (1-9%) of the variation in abundance of bird cherry oat aphids from four  
382 trap locations over a 20-year period and do not support any robust projections of  
383 responses of the aphid to climate trends (Bommarco et al. 2007). Long-term data  
384 sets do not exist for the bird cherry oat aphid in other regions or have not been  
385 analyzed. Although climate related stress on the first and higher trophic levels  
386 could affect populations of the bird cherry oat aphid, current data do not allow  
387 robust projections about the effects of climate change on the bird cherry oat  
388 aphid (Newman et al. 2003; Hoover and Newman 2004; Finlay and Luck 2011,  
389 but see Andrade et al. 2016 and Wade et al. 2017).  
390

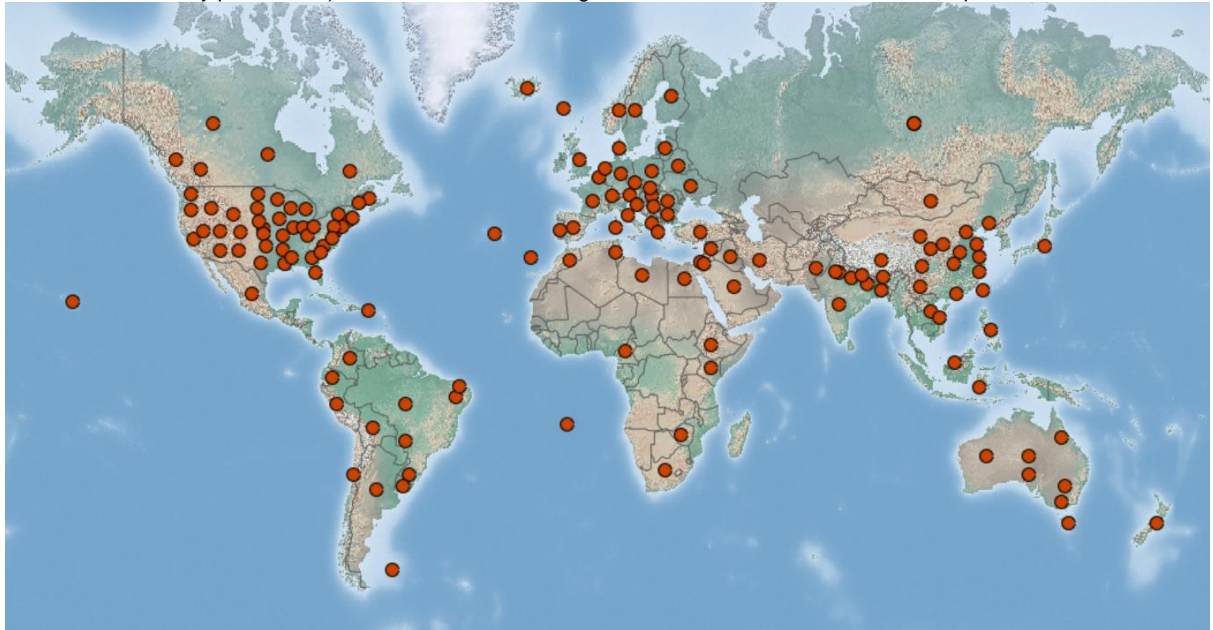

391  
392  
393  
394

Distribution map from: CABI, 2018. *Choristoneura fumiferana*. In: Invasive Species Compendium. Wallingford, UK: CAB International. [www.cabi.org/isc](http://www.cabi.org/isc). Printed with permission.

395 11. Russian wheat aphid (*Diuraphis noxia*) Hemiptera: Aphididae (Kurdjumov  
396 1913)

397

398 This aphid is a pest of wheat in North America, Africa, and Eurasia, Central Asia,  
399 Middle East, North Africa, Kenya, South Africa, Chile, Argentina, North America  
400 (first record 1986, Shufran et al. 2007) and South America (first records for Chile  
401 1988, Argentina 1992; Clua *et al.* 2004). The species is well studied because of  
402 its global distribution and potential for causing significant direct injury to wheat  
403 and other cereal crops. The species impact on natural systems is probably  
404 minimal. Potentially, *Diuraphis noxia* could respond to climate change directly,  
405 due to the constraints of its optimal thermal range and indirectly due to changes  
406 in the quality of its host plants under climate related stress, or changes in its  
407 natural enemy complex. The species is relatively well studied because of its  
408 global distribution and potential for causing direct injury to wheat and other cereal  
409 crops. This has included assessments of its development and mortality under  
410 varying thermal regimes (Michels and Behle 1988), which appeared to show  
411 reproductive an optimum at a relatively cool 20°C (see also Scott and Yeoh,  
412 1999). Thus, like other aphid species responses to warming trends will likely be  
413 complex and dependent upon baselines. There are few long-term data sets that  
414 could be used to develop projections of *D. noxia* responses to climatic drivers. In  
415 the Pacific Northwest of the USA, a network of 28 suction traps acquired  
416 extensive data on flights of *D. noxia* abundances over a 17-year trapping period.  
417 Interannual abundance exhibited evidence for biotic feedback, but in addition  
418 populations of the aphid were negatively correlated with increasing temperatures  
419 during the sampled period in the absence of density-dependent effect (i.e.,  
420 considering residuals after accounting for feedbacks) (Davis et al. 2014). Coupled  
421 with the relatively cool documented temperature optimum for this species  
422 (Michels and Behle 1988), this suggests warming trends would be associated  
423 with reduced abundance and therefore pest pressure from *D. noxia*, although this  
424 inference has not been fully substantiated. However, in Australia, a CLIMEX  
425 modeling approach suggested high suitability of dry inland wheat growing regions  
426 would be highly favorable for *D. noxia* infestation (Hughes and Maywald, 1990).  
427 Therefore, responses are likely to vary locally.

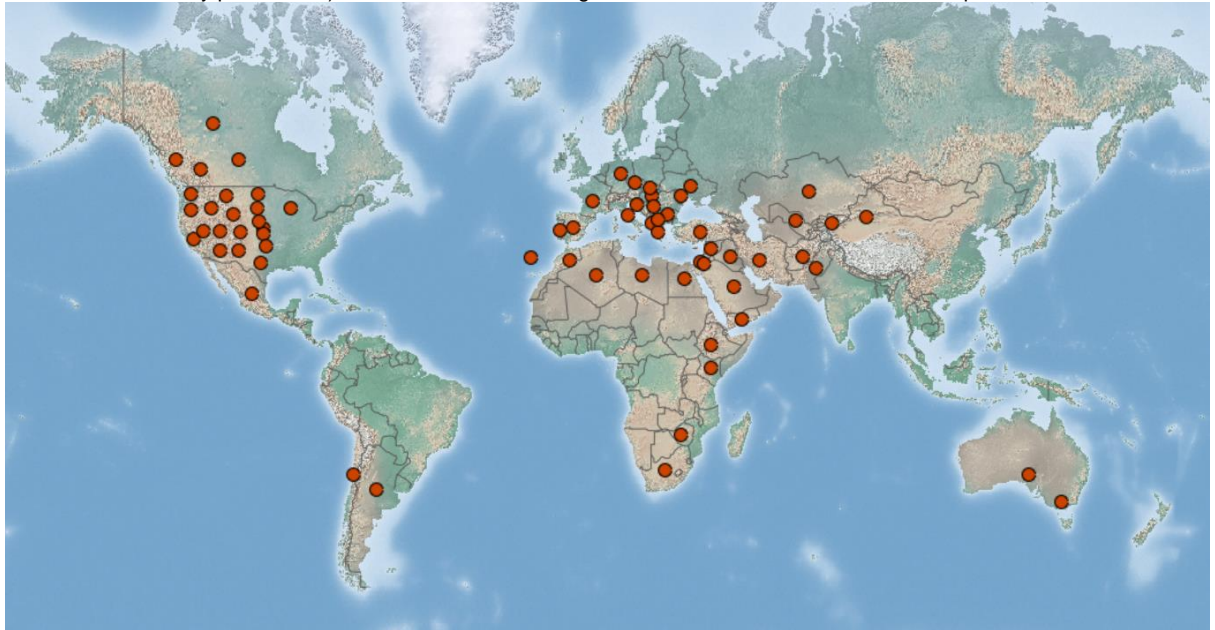

428  
429  
430  
431  
432  
433

Distribution map from: CABI, 2018. *Diuraphis noxia*. In: Invasive Species Compendium. Wallingford, UK: CAB International. [www.cabi.org/isc](http://www.cabi.org/isc). Printed with permission. Reviewed by: Mohammad Reza Nematollahi, Assistant Professor of Entomology, Department of Plant Protection, Isfahan Research Center for Agriculture and Natural Resources, Isfahan, Iran.

434 12. Hemlock woolly adelgid (*Adelges tsugae*) Hemiptera: Adelgidae (Annand  
435 1928)

436

437 The hemlock woolly adelgid (*Adelges tsugae*) is endemic to Eastern Asia and  
438 became a pest on the eastern hemlock (*Tsuga canadensis*) in N. America,  
439 causing extensive tree mortality in natural forests. It has extended its distribution  
440 range into north-eastern USA from the site of introduction in Virginia (Evans and  
441 Gregoire, 2007; Paradis et al., 2008). The limiting factor is winter temperature,  
442 which can be lethal for the overwintering stages (Paradis et al., 2008). With the  
443 increase in mean minimum winter temperature accompanying climate change,  
444 the aphid has progressively expanded to the north and simultaneously built up  
445 high densities in the already colonized areas, contributing greatly to hemlock  
446 dieback (Fitzpatrick et al., 2012, Leppanen & Simberloff 2017, McAvoy et al.  
447 2017). In this view, the temperature-dependent spreading occurs from the south  
448 to the north, leaving behind dead trees on which the insect cannot persist.  
449 However, there are indications that at the southern edge of the range the young  
450 nymphs suffer increased mortality because of summer heat, allowing the trees to  
451 survive (University of Georgia, personal communication).



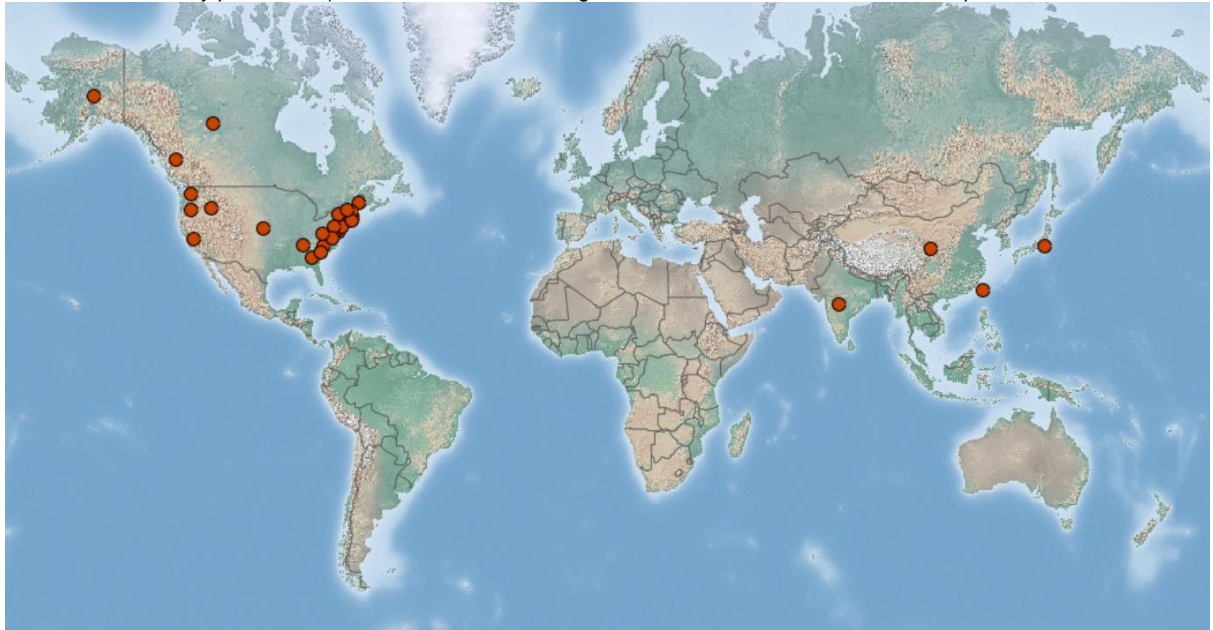

452

453

454

455

456

Distribution map from: CABI, 2018. *Adelges tsugae* (original text by National Biological Information Infrastructure (NBII) & IUCN/SSC Invasive Species Specialist Group (ISSG)). In: Invasive Species Compendium. Wallingford, UK: CAB International. [www.cabi.org/isc](http://www.cabi.org/isc). Printed with permission.

457 13. Sweet potato whitefly or Silverleaf whitefly (*Bemisia tabaci*) Hemiptera:  
458 Aleyrodidae (Gennadius 1889)

459

460 Although *Bemisia tabaci* is now recognized as a probable species complex (De  
461 Barro et al. 2011), collectively the group includes significant pests, including two  
462 species (now referred to as MEAM1 and Med) that are serious pests in the  
463 tropics and subtropics worldwide. Other members of the complex are regional  
464 pests. The pests cause direct injury and act as vectors of viruses affecting  
465 several important tropical crops, including cassava. The ecological impact of  
466 these species is little studied. As vectors of several plant viruses, they could  
467 affect natural communities and otherwise contribute to the stability of foodwebs.  
468 The general expectation for the Sweet potato whitefly is an expansion of range  
469 northward with warming, which would exacerbate its importance as a pest  
470 worldwide. This would presumably be most important in more temperate zones  
471 where its range could be currently constrained by cooler temperatures. In  
472 Europe, where *Bemisia* is currently confined to southern coastal environments,  
473 expansion of the pest northwards is thought to be prevented by lower  
474 temperatures. A process-based modeling exercise, with inputs from the extensive  
475 literature on the life history of the species and hypothetical uniform temperature  
476 changes of 1°C and 2°C project range expansions of *B. tabaci* into northern  
477 Spain, central France, Italy, Greece and along the Adriatic coast of the Balkans,  
478 but not into northern parts of Europe (Gilioli et al. 2014). Similar patterns are  
479 possible in other temperate regions (e.g. Zidon et al. 2016). Ongoing studies are  
480 examining responses to temperature and CO<sub>2</sub> increases have detected  
481 constraints at higher temperatures (between 28°C and 33°C) (Curnutte et al.  
482 2014), which may indicate reductions in pressure from the Sweet potato whitefly  
483 in certain regions as temperatures increase. These inferences pertain to the  
484 Sweet potato whitefly species that have been most widely studied. It is possible  
485 that other species within the complex and almost certain that other *Bemisia*  
486 species will respond differently to changing climate.

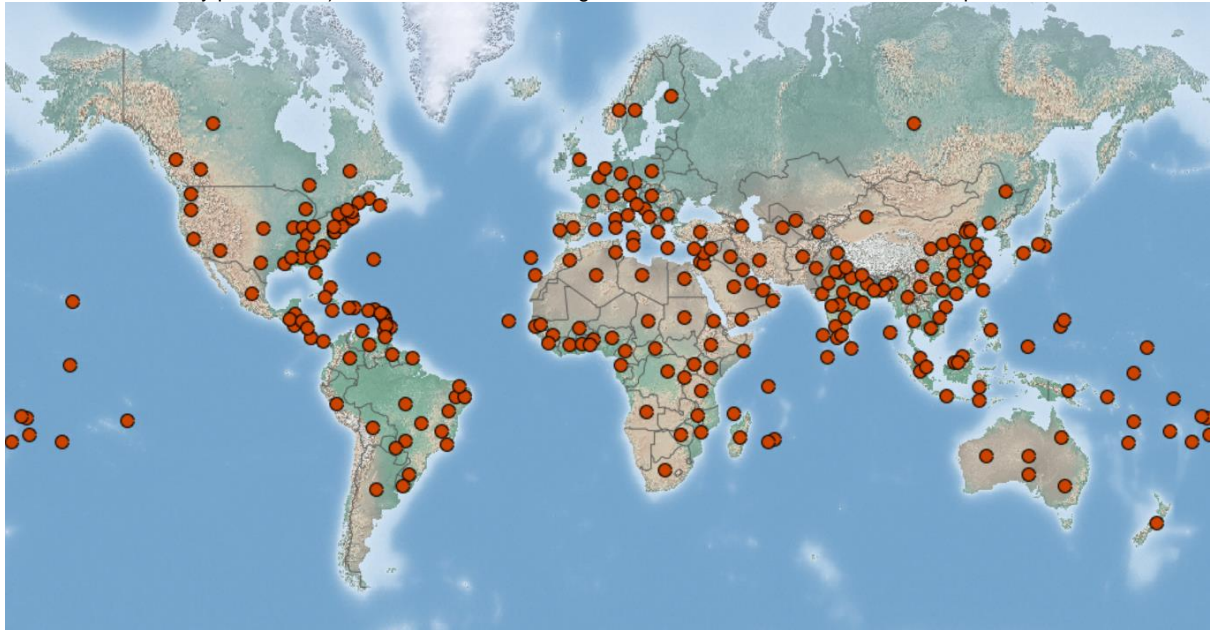

487  
488  
489  
490  
491

Distribution map from: CABI, 2018. *Bemisia tabaci*. In: Invasive Species Compendium. Wallingford, UK: CAB International. [www.cabi.org/isc](http://www.cabi.org/isc). Printed with permission. Reviewed by: Andrew Cuthbertson, Food and Environment Research Agency, Sand Hutton, York, UK

492        14. Southern green stink bug (*Nezara viridula*) Hemiptera: Pentatomidae  
493        (Linnaeus 1758)

494

495        The southern green stink bug (*Nezara viridula*) is a cosmopolitan pest of fruits  
496        and seeds, especially on herbaceous crops, with multiple generations per year  
497        and overwintering as an adult in a number of shelters, including buildings where it  
498        can become a nuisance. In Japan *N. viridula* is progressively occupying areas  
499        located outside the historic northern edge of the range, because of more  
500        favourable winter temperature for the adults (Musolin and Saulich 2012).

501        Interestingly, the expansion has resulted in a displacement of a native bug of the  
502        same genus (*N. antennata*) (Tougou et al. 2009). Laboratory studies reveal a  
503        sensitivity to thermal conditions during development, with higher temperatures  
504        leading to an increase in development rates and higher voltinism, though these  
505        responses were coupled with increased adult mortality (Musolin et al. 2010). It is  
506        therefore difficult to predict how warming temperature will affect the phenology,  
507        voltinism and survival of *N. viridula* in the field (Panizzi & Lucini 2016).

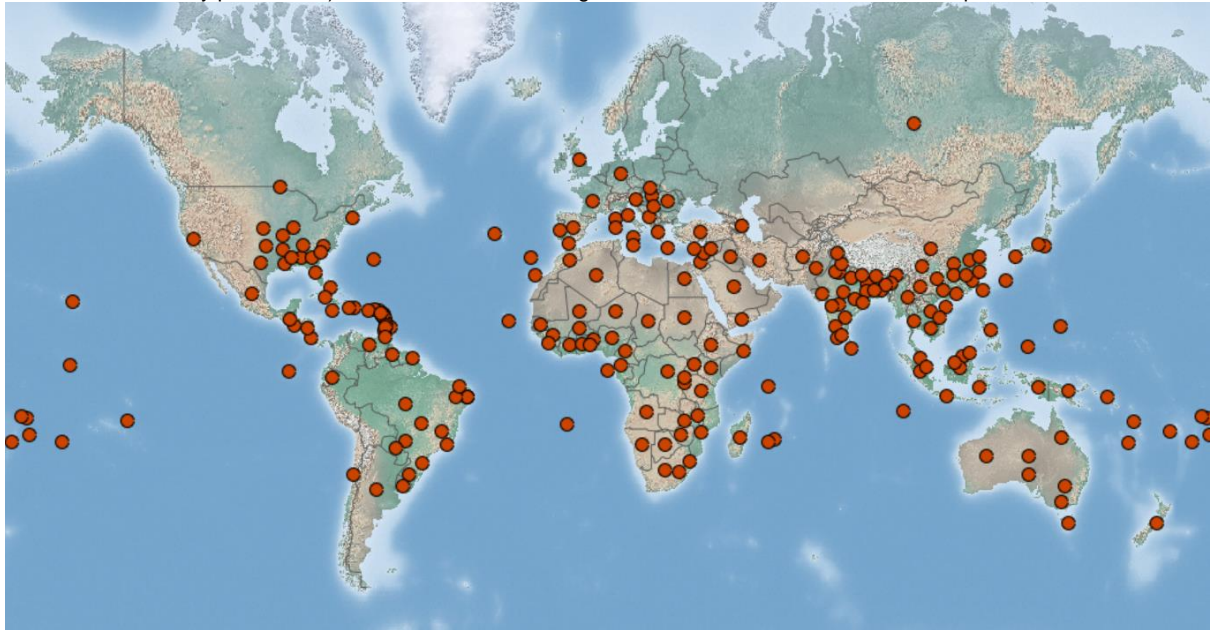

508

509

510

511

Distribution map from: CABI, 2018. *Nezara viridula*. In: Invasive Species Compendium. Wallingford, UK: CAB International. [www.cabi.org/isc](http://www.cabi.org/isc). Printed with permission.

512 15. The Asiatic rice borer (*Chilo suppressalis*) Lepidoptera: Crambidae (Walker  
513 1863)

514

515 The Asiatic rice borer, *Chilo suppressalis*, is a widely distributed and serious pest  
516 of rice. It occurs in large parts of the world but the main area is East Asia.  
517 Accidental introductions into Australia, North America, Hawaii and Europe have  
518 been observed but there are yet no records from Africa (Bleszynski 1970,  
519 Waterhouse 1993). Under favourable conditions the borer can have up to six  
520 generations per year but two is most common. The cold hardiness of the larvae  
521 seems to be independent of the diapause state of the insect (Lu et al. 2013),  
522 indicating that climate-induced changes in the life cycle will not lead to decreased  
523 risks for damage. The heat tolerance of the species is generally high and is better  
524 among larvae than adults, which translates into effects especially on fertility and  
525 less on survival (Lu et al. 2014). Analysis of 50-year annual light trap data from  
526 Japan indicates an increase in trap catches in years following winters with  
527 increasing temperatures (Yamamura et al. 2006). However, it is unlikely that  
528 climate warming will bring *C. suppressalis* back to its former pest status that  
529 peaked in the 1950's and early 1960's in Japan (Kiritani 2006). Observed  
530 increase in damage in later years in a closely related rice borer, *Tryporyza*  
531 *incertulas*, corroborates the findings of Yamamura et al. (2006) and has been  
532 attributed to warmer winters but also changes in cropping systems and cultivation  
533 practices together with decreased parasitism are considered to be of importance  
534 (Sun et al. 2003).

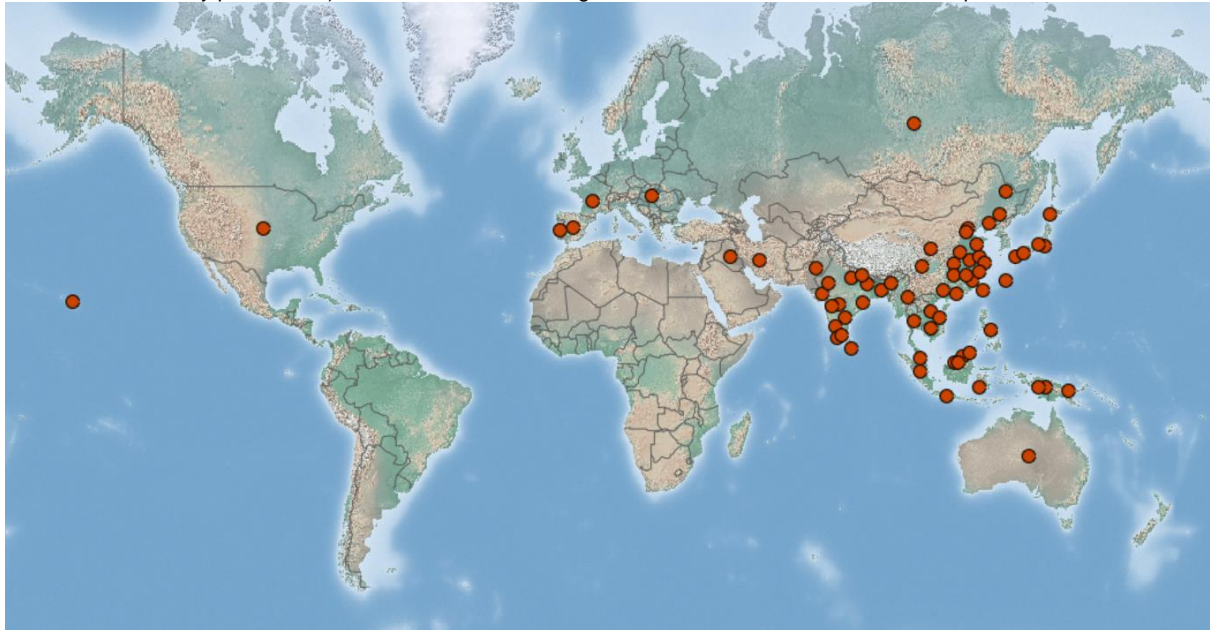

535

536

537

538

Distribution map from: CABI, 2018. *Chilo suppressalis*. In: Invasive Species Compendium. Wallingford, UK: CAB International. [www.cabi.org/isc](http://www.cabi.org/isc). Printed with permission.

539 16. The European corn borer (*Ostrinia nubilalis*) Lepidoptera: Crambidae (Hübner  
540 1796)

541

542 The European corn borer, *Ostrinia nubilalis*, is one of the most important pests on  
543 corn but cause damage also in potato and cotton. Its main distribution is in  
544 Europe, North America and some parts of northern Africa. In northern regions it  
545 has one generation per year but may have more than two in warm areas  
546 (Showers 1981, 1993). The ecological impact of *O. nubilalis* may be indirect and  
547 'positive'; an increased use of Bt-resistant GM-corn reduces the need for  
548 insecticides but the positive effect may be reversed and worsened if the pest  
549 develops resistance to Bt and non-target organisms are hit (Medvinsky et al.  
550 2004; Speiser et al. 2013). The development and voltinism of *O. nubilalis* seems  
551 to be particularly sensitive to climatic conditions (Onstad and Brewer 1996),  
552 making it suitable to use in climatic modeling efforts (Svobodova et al. 2014).  
553 However, the outcome of modeling efforts may vary considerably (Maiorano  
554 2012). The directly observed evidence of a climatic response include  
555 observations from Czech Republic of a sudden increase in infestation during the  
556 unusually warm period 1991-2000 (Trnka et al. 2007). In addition, analysis of light  
557 trap data from Hungary indicates an increase in number and damage, probably  
558 partly as a consequence of the appearance and spread of a bivoltine strain,  
559 connected to warming (Radin 1990; Keszthelyi 2010). A trend for decreasing  
560 damage during a cold period during the 1960's in Minnesota was broken in the  
561 warm year 1970 when the highest population densities since the peaks in early  
562 1950's were observed (Chiang and Hudson 1972). Further, in a series of  
563 experiments, Xiao et al. (2017) were able to link poor spring performance to  
564 warm winter climates, indicating that future warming could have negative effects  
565 on this pest, this however remains unsubstantiated in the field.



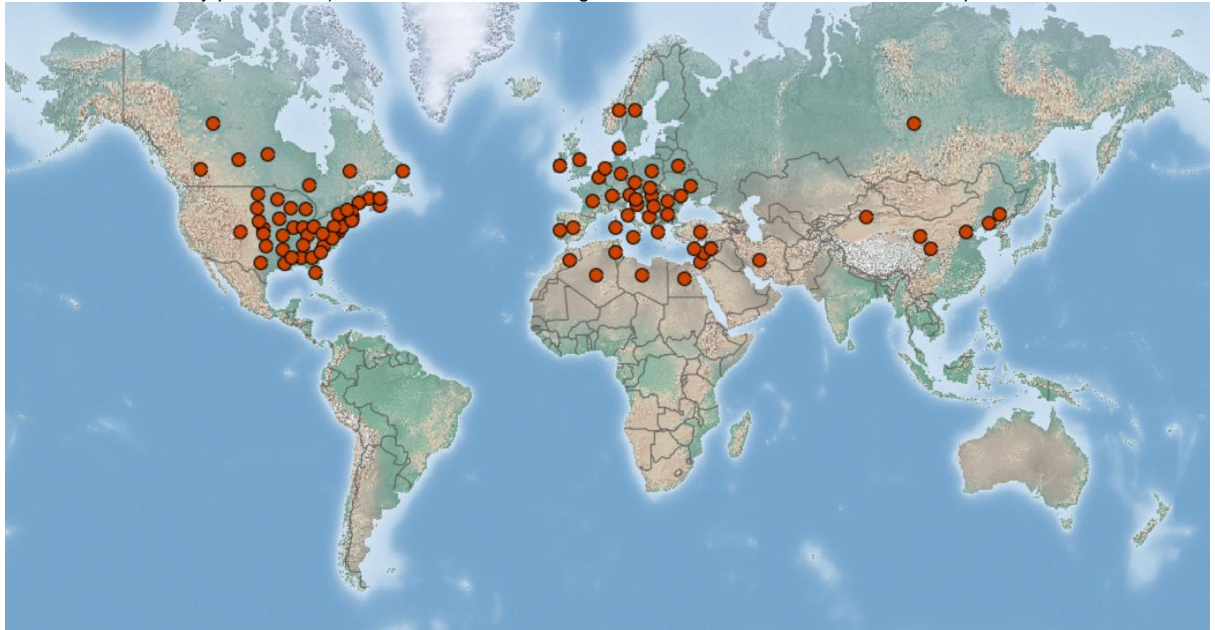

566

567

568

569

Distribution map from: CABI, 2018. *Ostrinia nubilalis*. In: Invasive Species Compendium. Wallingford, UK: CAB International. [www.cabi.org/isc](http://www.cabi.org/isc). Printed with permission.

570 17. The Cotton bollworm (*Helicoverpa armigera*) Lepidoptera: Noctuidae (Hübner  
571 1808)

572

573 The Cotton bollworm, *Helicoverpa armigera*, is a polyphagous pest causing  
574 damage on 200 plant species. It is a cosmopolitan pest mainly occurring in  
575 central and southern Europe, temperate parts of Asia, Africa Oceania, and  
576 Australia and has recently invaded South America (Kriticos et al. 2015). Beyond  
577 its present range, as a migrant, in Europe, it may reach northern regions where it  
578 cannot overwinter at present climatic conditions outdoors but still causes severe  
579 damage, particularly in glasshouses (Smith 1999). The damage in some core  
580 areas, such as India, has shown a general decline (Dhaliwal et al. 2010) but  
581 increases in damage has also been observed, as in for instance Japan (Kiritani  
582 2006). The density and damage of the species have been observed to increase  
583 in later years in China (after analyzing the period 1975 – 2011) due to increased  
584 temperature, declining rainfall and agricultural intensification (Lu et al. 2013),  
585 resulting in weakened negative density dependence, in turn, leading to the  
586 population equilibrium increasing to a higher level (Ouyang et al. 2014, 2016). In  
587 Hungary *H. armigera* was first observed in 1993 and had by 2001 spread over 94  
588 % of the country; the spread – and the level of damage – seems to be connected  
589 to moderately dry and warm weather conditions (Keszthelyi 2013). In Australia, a  
590 series of studies suggest that rainfall, rather than temperature is the major driver  
591 of population dynamics during summer, with early winter rainfall exerting positive  
592 and spring rainfalls negative effects on *H. armigera* and *H. punctigera* summer  
593 population sizes (Maelzer et al. 1996; Maelzer and Zalucki, 2000, Zalucki and  
594 Furlong, 2005).

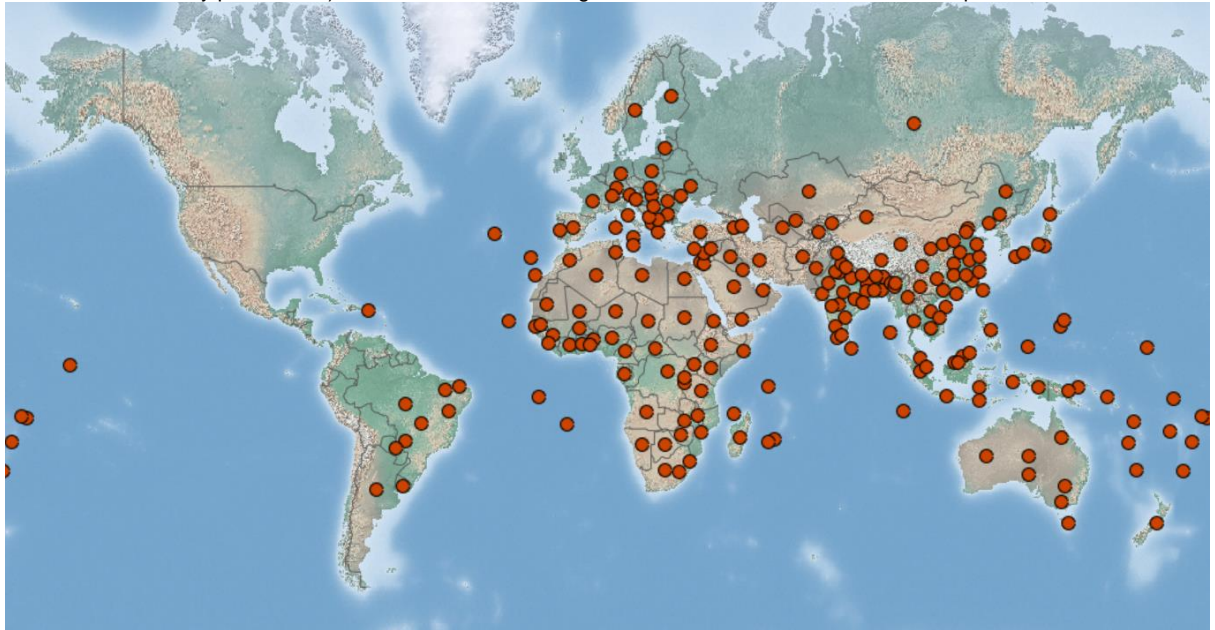

595

596

597

598

Distribution map from: CABI, 2018. *Helicoverpa armigera*. In: Invasive Species Compendium. Wallingford, UK: CAB International. [www.cabi.org/isc](http://www.cabi.org/isc). Printed with permission.

599 18. Mountain pine beetle (*Dendroctonus ponderosae*) Coleoptera: Curculionidae  
600 (Hopkins 1902)

601

602 The Mountain pine beetle, *Dendroctonus ponderosae*, is the most destructive  
603 insect pest of lodgepole pine (*Pinus contorta*) and other pine forests in the  
604 mountains of western North America. During the last decades vast Mountain pine  
605 beetle outbreaks have destroyed millions of hectares of pine forests in USA and  
606 Canada. The species has generally one generation per year at low elevations  
607 and the generation time is one or two years at high elevations (Bentz et al.,  
608 2014). Changing climate affects Mountain pine beetles at least in three main  
609 ways: 1) summer temperatures affect the timing of life history events which is  
610 important for the phenological synchrony of adult emergence – a necessary  
611 condition for mass attacks; 2) cold winter temperatures cause high mortality of  
612 overwintering beetles in some areas but not in all (Weed et al. 2015); 3) there are  
613 also indirect effects of weather on Mountain pine beetle dynamics via different  
614 mechanisms, especially via drought-altered changes in the defensive capacity of  
615 host trees. There appears to be genetic variability among Mountain pine beetle  
616 populations in their sensitivity to weather factors. Degree days required for the  
617 development of one generation are clearly less in populations living in cooler than  
618 warmer locations (Bentz et al., 2011). At higher summer temperatures  
619 populations at the warmer edge of the distribution mostly remain univoltine, but in  
620 the north the generation time shortens from two years to one, which increases  
621 the growth rate of these populations. At the cooler edge of its distribution,  
622 increasing winter temperatures (decreased winter mortality) also have facilitated  
623 range expansion northwards and to higher elevations than recorded previously.  
624 Due to this climatically driven range expansion, Mountain pine beetle encounters  
625 naïve (and less well defended) host populations and species (Cudmore et al.,  
626 2010; Raffa et al., 2013). There is also concern about the potential for the  
627 Mountain pine beetle to expand its range over the jack pine forests of central and  
628 eastern North America. Modeling work, however, suggests that the probability of  
629 this remains low to moderate during this century (Benz et al., 2010, 2016).

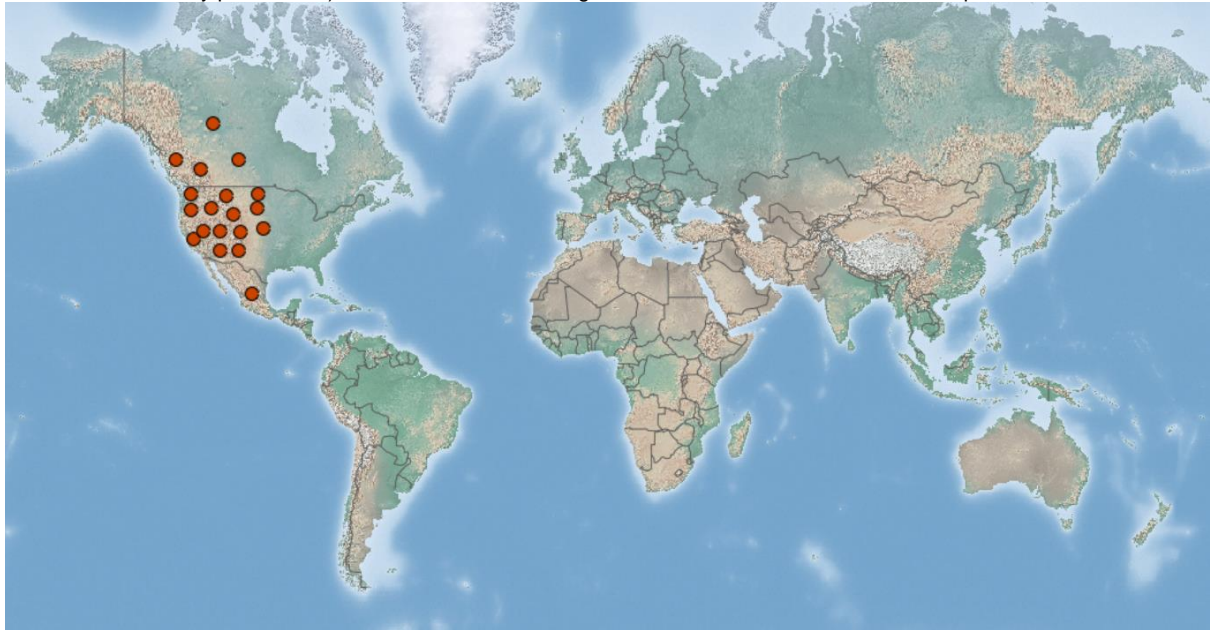

630

631

632

633

Distribution map from: CABI, 2018. *Dendroctonus ponderosae*. In: Invasive Species Compendium. Wallingford, UK: CAB International. [www.cabi.org/isc](http://www.cabi.org/isc). Printed with permission.

634 19. Southern pine beetle (*Dendroctonus frontalis*) Coleoptera: Curculionidae  
635 (Zimmermann 1868)

636

637 The southern pine beetle, *Dendroctonus frontalis* Zimmermann, is the  
638 economically most important pest insect of pines (primarily loblolly, *Pinus taeda*,  
639 and shortleaf, *P. echinata*, pines) from Central America to southern USA. Most of  
640 the time the Southern pine beetle lives on trees weakened or damaged by e.g.  
641 lightning strikes, storms or diseases, but during occasional outbreaks (normally  
642 lasting 2-3 years) these beetles can kill thousands of healthy pines. The annual  
643 economic losses due to the Southern pine beetle can exceed \$200 million in US.  
644 Depending on temperature the Southern pine beetle can have from one to nine  
645 generations per year. The relationships between climatic variables and Southern  
646 pine beetle outbreaks are complex and these may interact with other  
647 environmental effects and management activities (McNulty et al., 1997; Gumpertz  
648 et al., 1999; Ungerer et al., 1999; Williams & Liebhold 2002; Gan, 2004; Tran et  
649 al. 2007; Friedenberget al, 2008; Duehl et al., 2011, Marini et al. 2017). The most  
650 important factor limiting the northern distribution limit of Southern pine beetle  
651 outbreaks is minimum winter temperatures, as air temperatures of -16°C cause  
652 almost total mortality of the Southern pine beetle. Recently, Southern pine beetle  
653 outbreaks have been observed in New Jersey and even further north, of the  
654 historical outbreak range (Weed et al. 2013, Dodds et al. 2018). As climate  
655 warms further, the outbreak range is predicted to increase to large areas in  
656 northeast USA and southern Canada (Lesk et al. 2017).

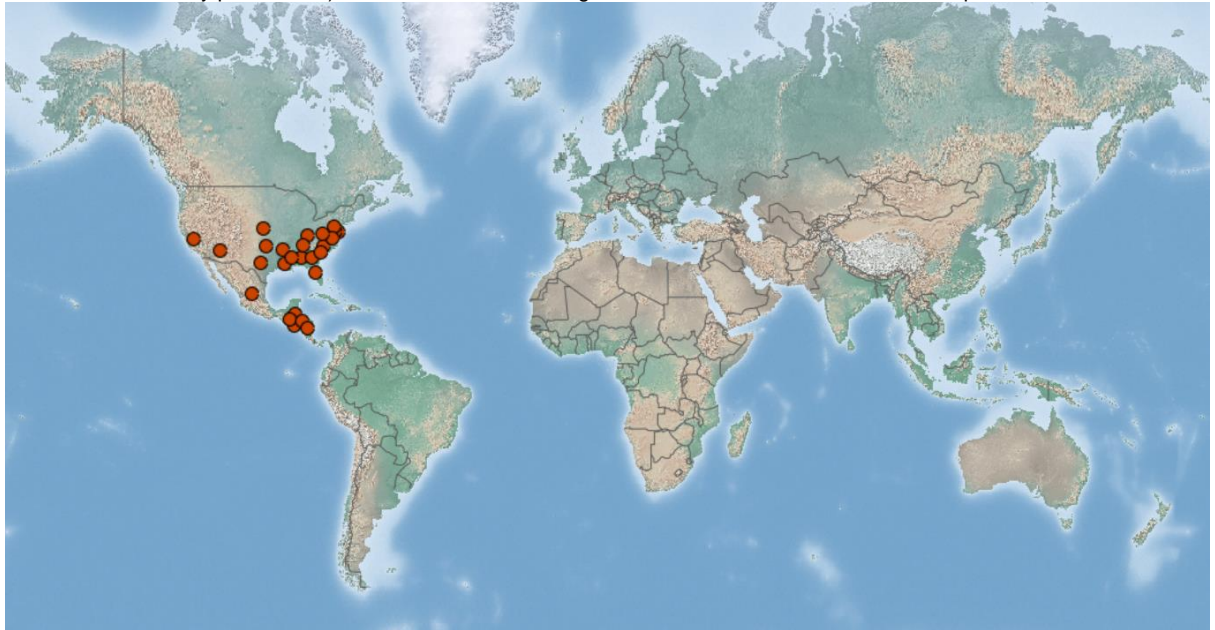

657

658

659

660

Distribution map from: CABI, 2018. *Dendroctonus frontalis*. In: Invasive Species Compendium. Wallingford, UK: CAB International. [www.cabi.org/isc](http://www.cabi.org/isc). Printed with permission.

661 20. Eurasian spruce bark beetle (*Ips typographus*) Coleoptera: Curculionidae  
662 (Linnaeus 1758)

663

664 The Eurasian spruce bark beetle (*Ips typographus*) is a major insect pest of  
665 spruce forests in Europe and some regions in Asia, mass-attacking and killing  
666 spruces over extensive areas during outbreaks (Grégoire and Evans 2004,  
667 Økland et al. 2012). More frequent extreme damages and drier and warmer  
668 summer climate may trigger both population growth and susceptibility of spruce  
669 stands to attack (Økland & Bjørnstad 2006, Marini et al. 2012, Netherer et al.  
670 2015). In northern areas, global warming may increase the productivity of host  
671 trees and indirectly the beetle populations due to more access to breeding  
672 substrates and enhanced conditions for flight and attacks. A warmer climate is  
673 expected to give a northern expansion of the area experiencing two generations  
674 per year (Lange et al. 2006, Jönsson et al. 2012), and more cases of bivoltinism  
675 have been observed in Finland and southern Scandinavia during the last years  
676 (Pouttu & Annala 2010). There have been few bark beetle outbreaks in the  
677 extensive areas of spruce forest in Finland and the northern part of Scandinavia,  
678 but increasing bark beetle populations and infestations have been reported in  
679 these areas during warm years in the last decades (Økland et al. 2009).  
680 Increased frequency of drought periods due to global warming may extend the  
681 areas of bark beetle infestations in Southern and Central Europe, since lower  
682 than average precipitation seems to generally favour bark beetle infestations at  
683 the southern margin of the spruce distribution in Europe (Marini et al. 2012,  
684 Netherer et al. 2015). While the optimal areas for spruce are in northern Europe  
685 and the mountain ranges of Central Europe, even-aged plantations outside the  
686 natural range of Norway spruce are highly susceptible to disturbance events such  
687 as wind throw and bark beetle attacks.



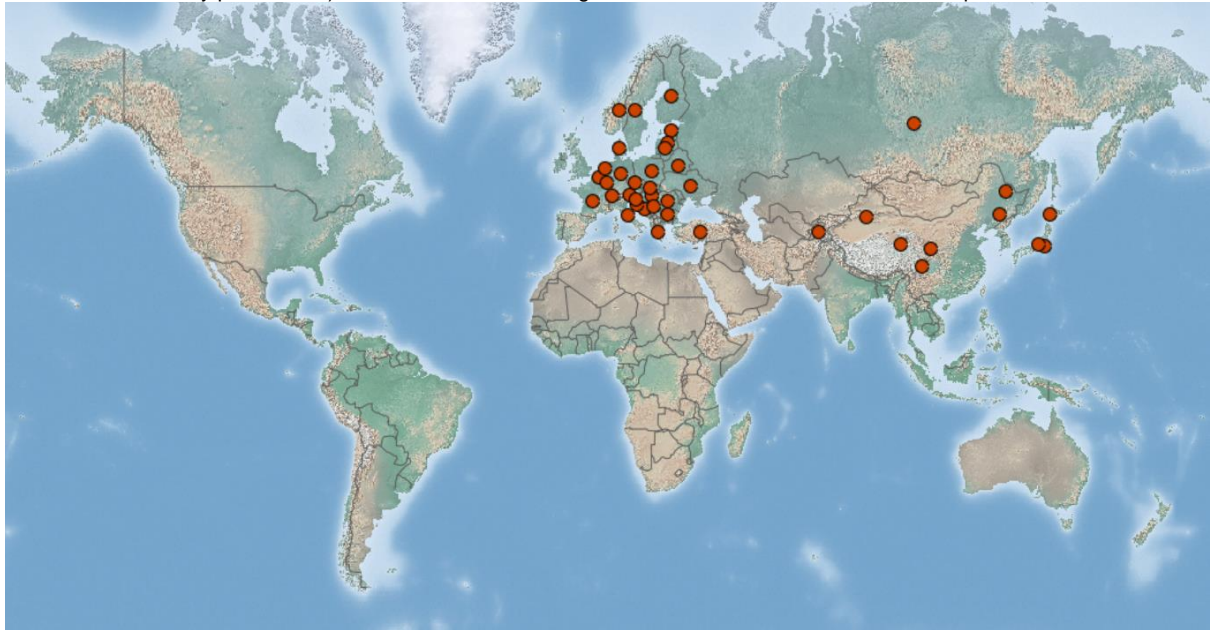

688

689

690

691

Distribution map from: CABI, 2018. *Ips typographus*. In: Invasive Species Compendium. Wallingford, UK: CAB International. [www.cabi.org/isc](http://www.cabi.org/isc). Printed with permission.

692 21. Olive fruit fly (*Bactrocera oleae*) Diptera: Tephritidae (Rossi 1790)

693

694 *Bactrocera oleae* is a specialized fruit feeder associated with the olive tree (*Olea*  
695 *europaea*) in most of its cultivation range. It is active all year long, depending on  
696 temperature and availability of fruits, with multiple generations. Gutierrez et al.  
697 (2009) suggest that the range of the olive fly will retract in the south and expand  
698 in the northern part of the range, both in North America and Europe, due to the  
699 effect of high temperature during summer and milder winter on the adult flies,  
700 respectively. Ponti et al. (2014) predict that in the Mediterranean region the  
701 damage of the pest will change dramatically in the near future as a consequence  
702 of climate change, with large socio-economic impacts on farmers. This effect was  
703 documented by Marchi et al. (2016) using a 13 year dataset from central Italy,  
704 suggesting that mild winter temperature is the main driver of high infestation  
705 rates.

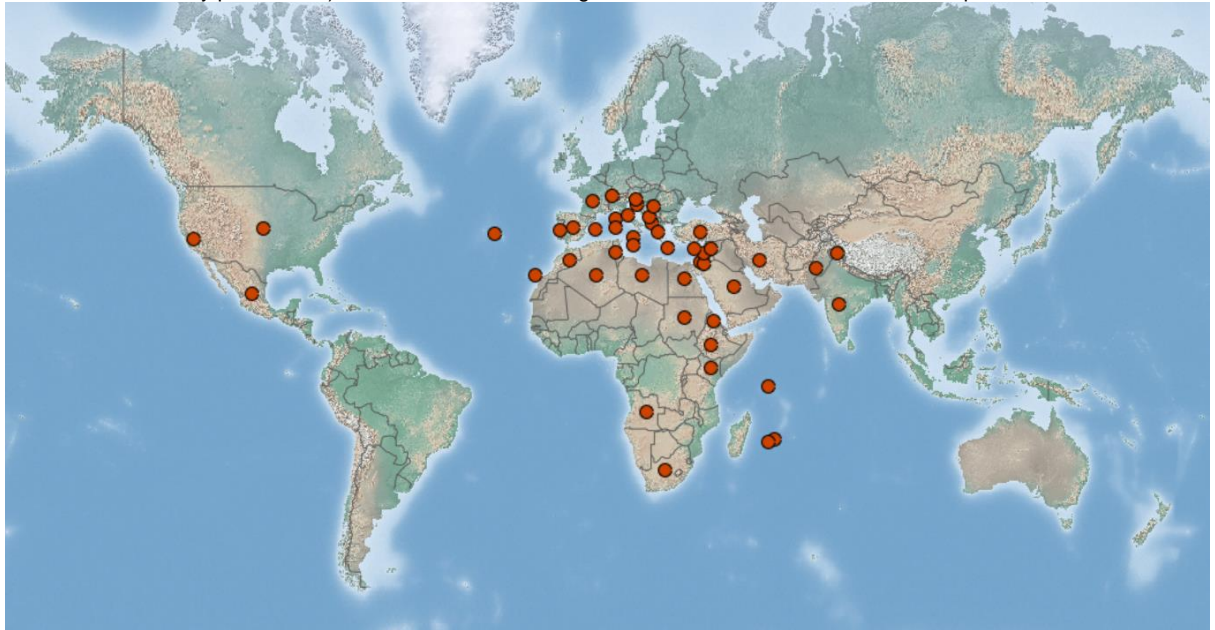

706

707

708

709

Distribution map from: CABI, 2018. *Bactrocera oleae*. In: Invasive Species Compendium. Wallingford, UK: CAB International. [www.cabi.org/isc](http://www.cabi.org/isc). Printed with permission.

710 22. Codling moth (*Cydia pomonella*) Lepidoptera: Tortricidae (Linnaeus 1758)

711

712 The Codling moth (*Cydia pomonella*) is a major polyphagous pest of fruit trees  
713 including apple, pear and walnut, and impacts the economies of many countries  
714 across the globe (Dorn et al., 1999). The species is native to Europe, but it can  
715 now be found in nearly all temperate fruit-growing regions across the world  
716 (generally above 30°N and below 30°S; (Willett et al., 2009). The Codling moth  
717 undergoes a facultative diapause in the larval stage, and across its range  
718 voltinism varies, generally decreasing at higher latitudes. In walnut orchards  
719 across California rising temperatures over the past 50 years have been  
720 associated with increases in the number of generations completed each season  
721 (Luedeling et al., 2011). These patterns are also reflected in modeling studies  
722 that consider Codling moth populations in Switzerland (Stoeckli et al., 2012),  
723 Norway (Rafoss and Saethre, 2003), Poland (Juszczak et al., 2013) and Marocco  
724 (El Iraqui and Hmimina 2016). By driving these models with data of future climate  
725 change scenarios, the authors consistently predict further increases in voltinism,  
726 as well as an expansion in distribution into higher latitudes (Rafoss and Saethre,  
727 2003). The boundary of this species range at low latitudes, however, is currently  
728 constrained by winter temperatures that fail to induce larval diapause  
729 (Sheldeshova, 1967; Willett et al., 2009). Therefore, a contraction in this species'  
730 range boundary at low latitudes due to increasingly warmer winters may also  
731 occur, leading to an overall shift in this species' distribution. As such, changes in  
732 crop damage caused by the Codling moth under future climate change scenarios  
733 are likely to vary among different fruit growing regions.

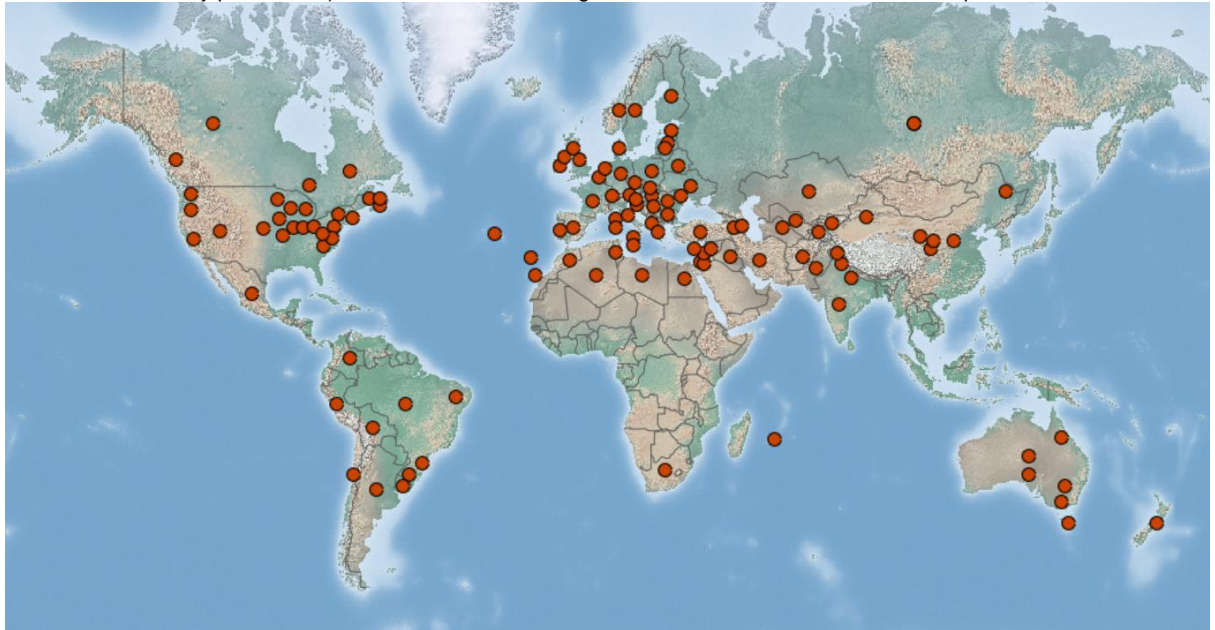

734

735

736

737

Distribution map from: CABI, 2018. *Cydia pomonella*. In: Invasive Species Compendium. Wallingford, UK: CAB International. [www.cabi.org/isc](http://www.cabi.org/isc). Printed with permission.

738 23. Coffee Berry Borer (*Hypothenemus hampei*) Coleoptera: Curculionidae  
739 (Ferrari 1867)

740

741 The Coffee berry borer (*Hypothenemus hampei*) is an important global pest of  
742 *Coffea* species including *C. arabica* and, to a lesser extent, *C. canephora*,  
743 causing global economic losses of up to \$US 500 million per annum (Vega et al.  
744 2003; Vega & Hofstetter 2015). The species is thought to originate in Eastern and  
745 Central Africa (Le Pelley 1968); however it has spread through human-mediated  
746 dispersal to all coffee growing regions across Africa, Asia and the Americas  
747 (Jaramillo et al. 2006). All life-history stages of *H. hampei* inhabit and feed on  
748 coffee berries and so, across its distribution, the number of generations  
749 completed per year varies from one to nine depending on the duration of the local  
750 fruiting season (Damon 2000). Survival and performance of this species are  
751 directly affected by temperature (Jaramillo et al. 2009), and recent warming  
752 conditions have been associated with an expansion of its range into higher  
753 elevations, where it was previously thought to be too cold for the beetle to inhabit  
754 (Jaramillo et al. 2009). For example, in comparison to 1984 when there were no  
755 infestations of the Coffee berry borer at Jimma in Ethiopia, current conditions  
756 allow for the completion of one to two generations per year (Mendesil et al. 2003;  
757 Jaramillo et al. 2009). Increases in voltinism of this species in Kenya and  
758 Colombia have also been linked to rises in temperature over recent decades  
759 (Jaramillo et al. 2009). As such, future increases in temperature are predicted to  
760 have an overall positive effect on this species (Jaramillo et al. 2011). The income  
761 from coffee production sustains an estimated 20 million families (Vega et al.  
762 2003), and so the increasing voltinism and expanding distribution of this pest  
763 under future climates will likely have substantial socio-economic impacts on a  
764 global scale.

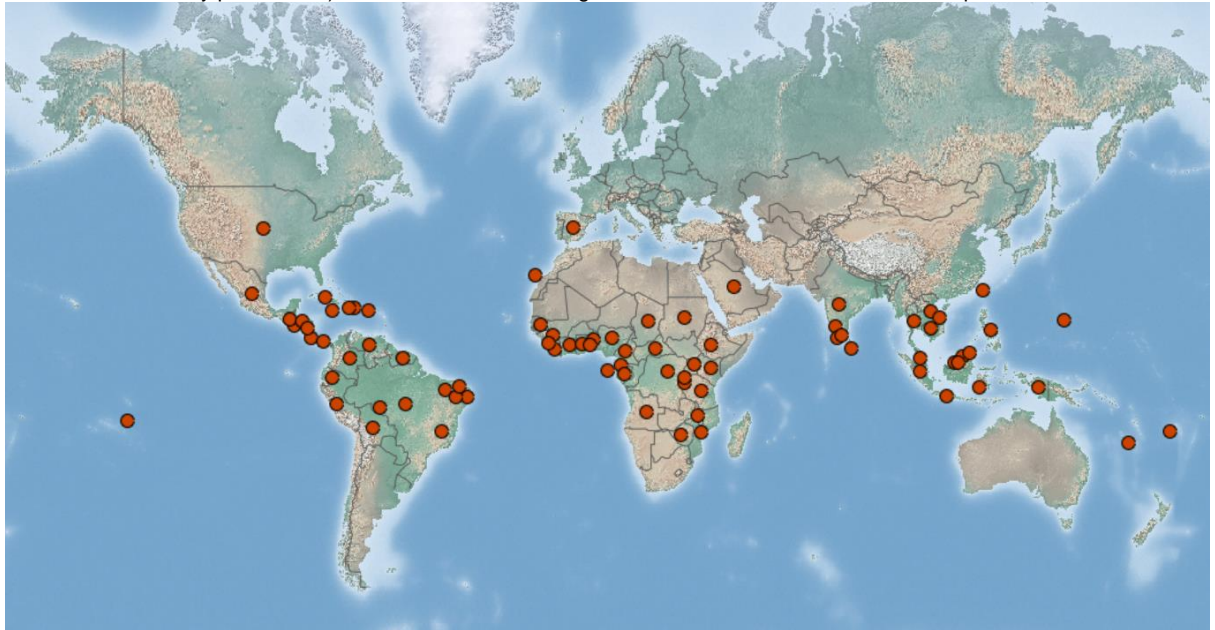

765  
766  
767  
768  
769  
770

Distribution map from: CABI, 2018. *Hypothenemus hampei*. In: Invasive Species Compendium. Wallingford, UK: CAB International. [www.cabi.org/isc](http://www.cabi.org/isc).  
Printed with permission. Reviewed by: Peter Baker, CAB Europe - UK, Bakeham Lane, Egham, Surrey TW20 9TY, UK

771 24. Western corn rootworm (*Diabrotica virgifera virgifera*) Coleoptera:  
772 Chrysomelidae (LeConte 1868)

773

774 The western corn rootworm *Diabrotica virgifera virgifera* is a chrysomelid beetle  
775 native to Central America and an oligophagous pest of maize and other cereals.  
776 While it has been one of the most important insect pest species in the US for  
777 many decades (coined “one billion dollar bug” in the 1980ies - Gassmann 2012),  
778 starting early in the 1990s the Western corn rootworm was accidentally  
779 introduced to Europe by a series of invasion events (Miller et al. 2005, Ciosi et al.  
780 2008) where it now causes extensive damage to European maize crops. A  
781 northward range expansion is indicated by the repeated introductions at  
782 increasing latitudes in Europe (Miller et al. 2005, Ciosi et al. 2008, Bermond et al.  
783 2012). Establishment in many parts of Central Europe seems to be likely (e.g.  
784 Baufeld et al. 1996) and further northward range expansion due to advancement  
785 of the upper physiological limit has been modelled (Aragón and Lobo 2012, see  
786 also Haridas et al. 2016). As a vector of the *Maize chlorotic mottle virus*, known to  
787 infect a range of naturally occurring grasses of the family *Poaceae* (Scheets  
788 2004), the Western corn rootworm has the potential to cause significant  
789 ecological damage.



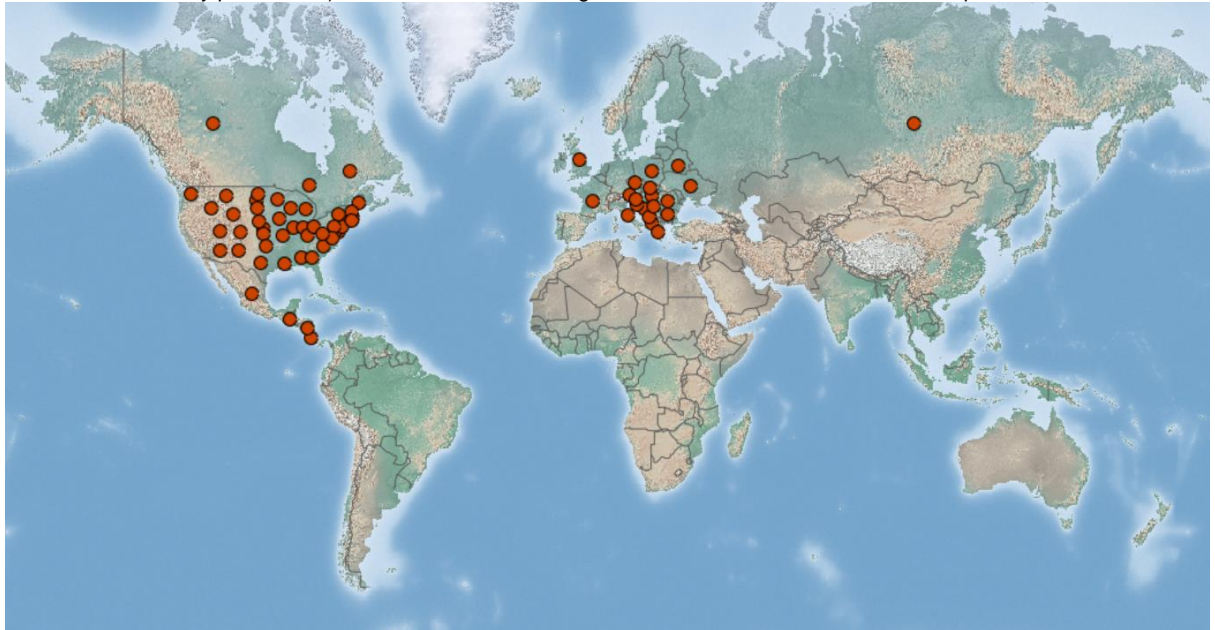

790  
791  
792  
793

Distribution map from: CABI, 2018. *Diabrotica virgifera virgifera*. In: Invasive Species Compendium. Wallingford, UK: CAB International. [www.cabi.org/isc](http://www.cabi.org/isc). Printed with permission.

794 25. Japanese beetle (*Popillia japonica*) Coleoptera: Scarabaeidae (Newman  
795 1841)

796

797 The Japanese beetle *Popillia japonica* is a scarabaeid beetle native to the main  
798 islands of the Japanese archipelago where this species is not considered a pest  
799 due to a lack of suitable habitats, effective control by its natural enemies and  
800 regular shortages of its main resources (Fleming 1972, 1976). After its  
801 introduction into the United States in the early 20<sup>th</sup> century, however, it became a  
802 very successful pest species of high socioeconomic impact in large parts of the  
803 eastern US while its potential distribution includes many other humid, temperate  
804 regions globally (Allsopp 1996). *Popillia japonica* is a generalist considered one  
805 of the most polyphagous of plant-feeding insects and it is known to feed on more  
806 than 300 species of wild and cultivated plants (Fleming 1972, Potter and Held  
807 2002, Lemoine et al. 2013). Amongst these many potential beetle-plant  
808 interactions the effects of *P. japonica* on soy bean appear to be covered best by  
809 recent, climate-change related research (e.g. Hamilton et al. 2005, DeLucia et al.  
810 2012, Niziolek et al. 2013, but see Lemoine et al. 2013). The root feeding grubs  
811 are important turf pests in parks, gardens or golf courses (Fleming 1972, Potter  
812 and Held 2002). Generally, economic damage caused by *P. japonica* is mainly  
813 attributed to defoliating adults but fruit and flower feeding also has considerable  
814 impact (Held and Potter 2004). While there is little information about climate  
815 change effects on the damage potential of *P. japonica* root feeding grubs, there  
816 are considerably more studies analyzing climate change effects on the feeding  
817 damage caused by adult beetles. For instance several studies demonstrate a  
818 high potential for enhanced foliar damage in soy bean related to elevated CO<sub>2</sub>-  
819 levels and/or higher temperatures (Hamilton et al. 2005, Zavala et al. 2008,  
820 O'Neill et al. 2008, Dermody et al. 2008, Niziolek et al. 2013). On the contrary  
821 DeLucia et al (2012) report that earlier emergence of *P. japonica* caused by  
822 progressively warmer winters and spring should reduce the potential for  
823 defoliation-induced yield losses in the interaction with this particular host species.  
824 Finally, there is one recent study that has looked at the impact of rising  
825 temperatures on diet composition in *P. japonica* by testing nine different plant  
826 species: Lemoine et al (2013, 2017) found that (1) consumption generally  
827 increases with rising temperature while (2) diet breadth is reduced. These  
828 findings suggest that the consequences related to climate change are highly  
829 crop-species specific and predictions at the global socio-economic scale are  
830 complex and hard to make.

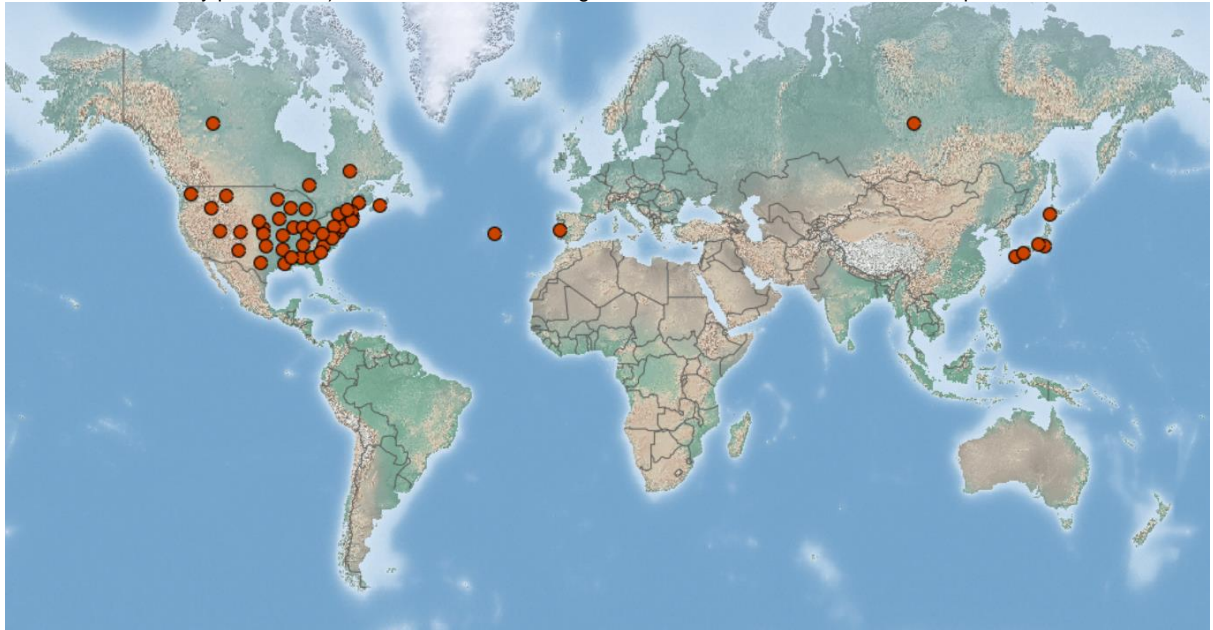

831  
832  
833  
834  
835  
836

Distribution map from: CABI, 2018. *Popillia japonica*. In: Invasive Species Compendium. Wallingford, UK: CAB International. [www.cabi.org/isc](http://www.cabi.org/isc).  
Printed with permission. Reviewed by: Michael Klein, Ohio Agricultural Research and Development Center, Adjunct Associate Professor, 1680 Madison Avenue, Wooster, OH 44691, USA

837 26. African sugarcane stalk borer (*Eldana saccharina*) Lepidoptera: Pyralidae  
838 (Walker 1865)

839

840 The African sugarcane stalk borer (*Eldana saccharina*) is a multivoltine  
841 Lepidopteran pest that infests a wide range of crops including sugar cane, maize  
842 and sorghum (Assefa et al., 2006). The larval stage of this pest infests its host by  
843 boring into its stalks, resulting in major tissue damage and economic losses. This  
844 species originated in western Africa, but is now found broadly across sub-  
845 Saharan Africa (from 15°N to 30°S). Since its initial invasion into South Africa in  
846 the 1930's the species has more recently spread from coastal to inland regions  
847 which were previously thought to be too cold to inhabit (Dick, 1945; Way, 1994).  
848 Studies suggest that this range expansion has been facilitated by a switch in host  
849 plant from sugar cane to maize (Assefa et al., 2008; Assefa et al., 2006), and an  
850 adaptation in the lower critical temperature threshold (Kleynhans et al., 2014a;  
851 Kleynhans et al., 2014b). The species also exhibits phenotypic plasticity in  
852 response to variation in rearing conditions: warmer temperatures induce faster  
853 development and growth (Atkinson, 1980; Way, 1995), but adults emerge with a  
854 smaller body size, increased rates of water loss and reduced longevity and  
855 fecundity (Kleynhans et al., 2014b). These laboratory findings suggest that as  
856 temperatures in the field continue to warm, we may expect an increase in  
857 voltinism across the range of the African sugarcane stalk borer. However, given  
858 that higher temperatures also lead to smaller adults and reduced performance of  
859 size-related traits (Kleynhans et al., 2014c), any likely changes in crop damage  
860 caused by this pest remain difficult to predict. Making such predictions is further  
861 complicated by the high rates of adaptation observed in this species (Assefa et  
862 al., 2006; Kleynhans et al., 2014b). Further work that compares recent changes  
863 in local temperature and rainfall with the expansion of this species into central  
864 South Africa may, nonetheless, provide valuable insights into the role that climate  
865 plays in limiting the distribution, phenology and damage caused by this invasive  
866 pest.

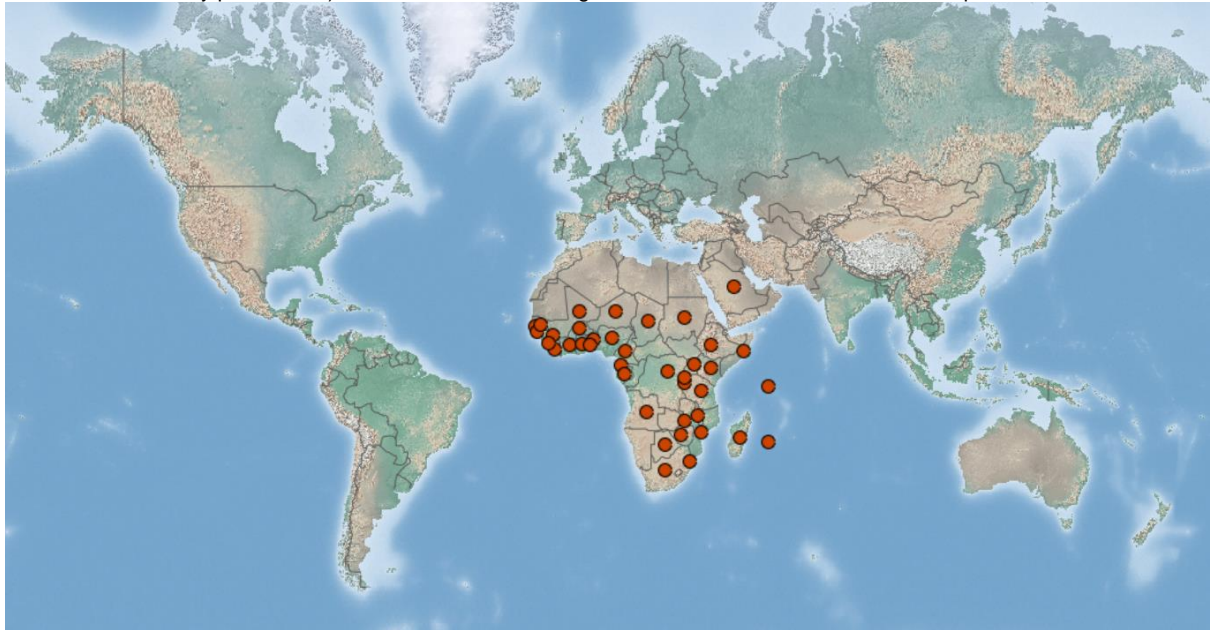

867

868

869

870

Distribution map from: CABI, 2018. *Eldana saccharina*. In: Invasive Species Compendium. Wallingford, UK: CAB International. [www.cabi.org/isc](http://www.cabi.org/isc). Printed with permission.

871 27. Coffee leaf miner (*Leucoptera coffeella*) Lepidoptera: Lyonetiidae (Guérin-  
872 Méneville 1842)

873

874 The larvae of the Coffee leaf miner (*Leucoptera coffeella*) damage the  
875 assimilative parenchyma of *Coffea* species (Pereira et al. 2007) during 9-40 days  
876 confined within the leaf, and then form pupae on the outside of the leaf. The  
877 damage may extend to 37% of the cultivated coffee plantations leading to  
878 reduced flower formation, fructification and consequently up to a yearly loss of  
879 40-80% in yield. The damage was considered to occur only during the dry season  
880 up to 1970, but recently the leaf miner has caused damage in both dry and wet  
881 seasons in areas of Sao Paulo in Brazil (Ghini et al. 2008). Studies indicate that  
882 temperature and precipitation are significant factors in the pest population  
883 dynamics. Currently approximately 8-12 overlapping generations may occur  
884 during the year. However, more generations of the coffee leaf miner per year  
885 would be possible to achieve in the predicted climate change scenarios (Ghini et  
886 al. 2008). As the performance of the coffee leaf miner is limited at high elevation  
887 in Mexico (Lomelí-Flores et al. 2010), mainly because of reduced temperature, it  
888 seems likely that climate change will facilitate range expansion into areas which  
889 at the moment are unaffected or only affected to a small degree.

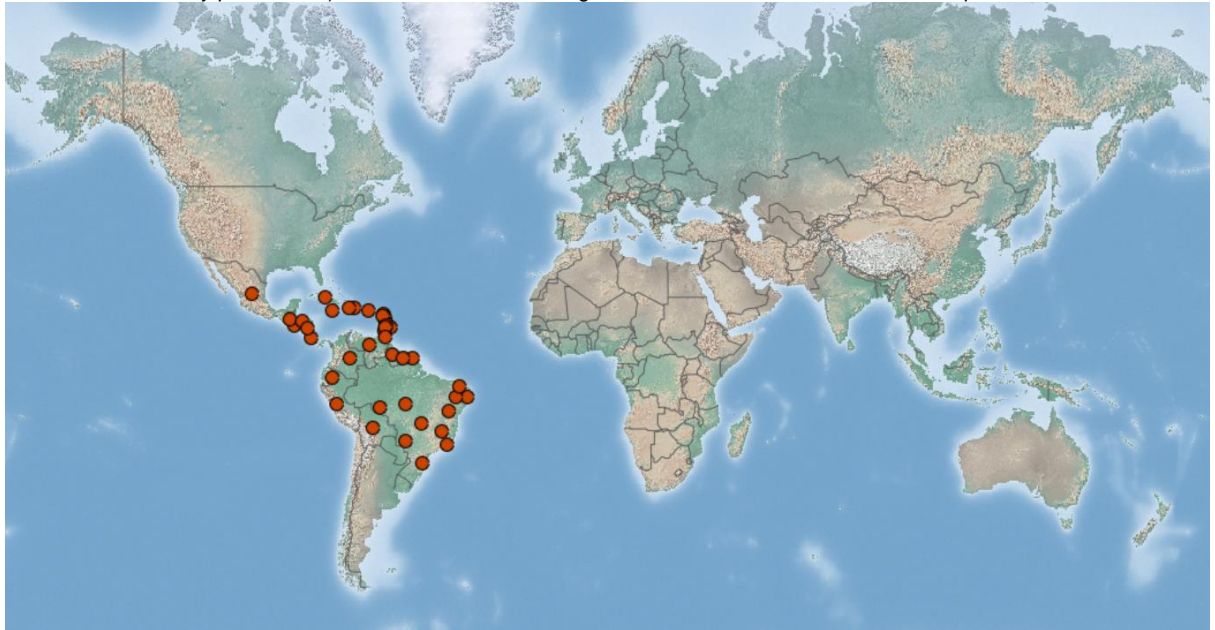

890

891

892

893

Distribution map from: CABI, 2018. *Leucoptera coffeella*. In: Invasive Species Compendium. Wallingford, UK: CAB International. [www.cabi.org/isc](http://www.cabi.org/isc). Printed with permission.

894 28. Citrus peel miner (*Marmara gulosa*) Lepidoptera: Gracillariidae (Guillén &  
895 Davis 2001)

896

897 The peel mining moth, *Marmara gulosa*, feeds on and damages the peel of the  
898 fruit of more than 31 families of plants. These include grapefruit, lemon, oranges  
899 and citrus, but also other orchard fruit such as apple and avocado and  
900 ornamental trees such as oleander and willow (Guillén et al. 2003). The wide host  
901 range allows the moth to switch hosts according to availability during the growing  
902 season (Grafton-Cardwell et al. 2008). The damage on the commercial citrus  
903 fruits is economically important only in California, Arizona, Mexico and Cuba,  
904 although the species occurs throughout the United States (Guillén et al. 2003).  
905 Two to three mines per fruit renders the fruit commercially unacceptable. On  
906 occasion, the damage may cause up to 80-90% fruit loss (Guillén et al. 2003).  
907 The temperature range for development is between 12-33°C and the average  
908 degree days required for the development of one generation is 309-375,  
909 depending on the host species (O'Neal et al. 2011). The peel miner is fairly  
910 efficiently controlled by a biocontrol agent (*Cirrospilus coachellae*). However, this  
911 parasitoid wasp does not tolerate as cold temperatures as the peel miner  
912 (Grafton-Cardwell et al. 2008).

913

914 No distribution map available at CABI, but the species is restricted to California,  
915 Arizona, Texas, Florida and Cuba according to Jones et al. 2001.



916 29. Citrus leaf miner (*Phyllocnistis citrella*) Lepidoptera: Gracillariidae (Stainton  
917 1856)

918

919 The citrus leaf miner is native to Asia, but currently occupies a global distribution  
920 range from Japan to Australia to India and Africa to South and North America  
921 (Grafton-Cardwell et al. 2008). The larvae mine the leaves of citrus trees, such as  
922 mandarins, lemons, limes and grapefruit. Damage on the leaves is most notable  
923 in the nurseries, but does not kill the trees. More severe damage is caused by a  
924 bacterial disease, the citrus bacterial canker (*Xanthomonas axonopodis* pv. *citri*),  
925 facilitated by the feeding damage done by the leaf miner. The citrus bacterial  
926 canker, while primarily a pathogen of cultivated plants, is known to infect a range  
927 of natural plants in the family Rutaceae. The annual losses due to the disease  
928 and consequent costs of eradication during 20 years after discovering, have been  
929 estimated at 28 million USD in the USA (Gottwald 2000). Efficient management  
930 of the disease involves eradication of the host within a radius from the infestation  
931 point. The leaf miner completes 5-6 generations in Asia (Grafton-Cardwell et al.  
932 2008) with a generation time between 11.4 to 32.8 days (at 32°C and 18°C  
933 respectively), and shows no significant reduction in survival within a temperature  
934 range from 18 to 32°C (Chagas & Parra 2000). Furthermore, the Citrus leaf miner  
935 does not enter diapause in the colder months of the year, but instead slows down  
936 development (Lim and Hoy 2006). Therefore, it may be hypothesized that a  
937 warming climate allows for faster development and a consequent increase in the  
938 number of generations. It can be noted that ongoing climate warming is  
939 suggested to be an important factor in facilitating northward range expansion in  
940 the closely related species *Phyllonorycter leucographella* (Gröbler & Lewis 2008).

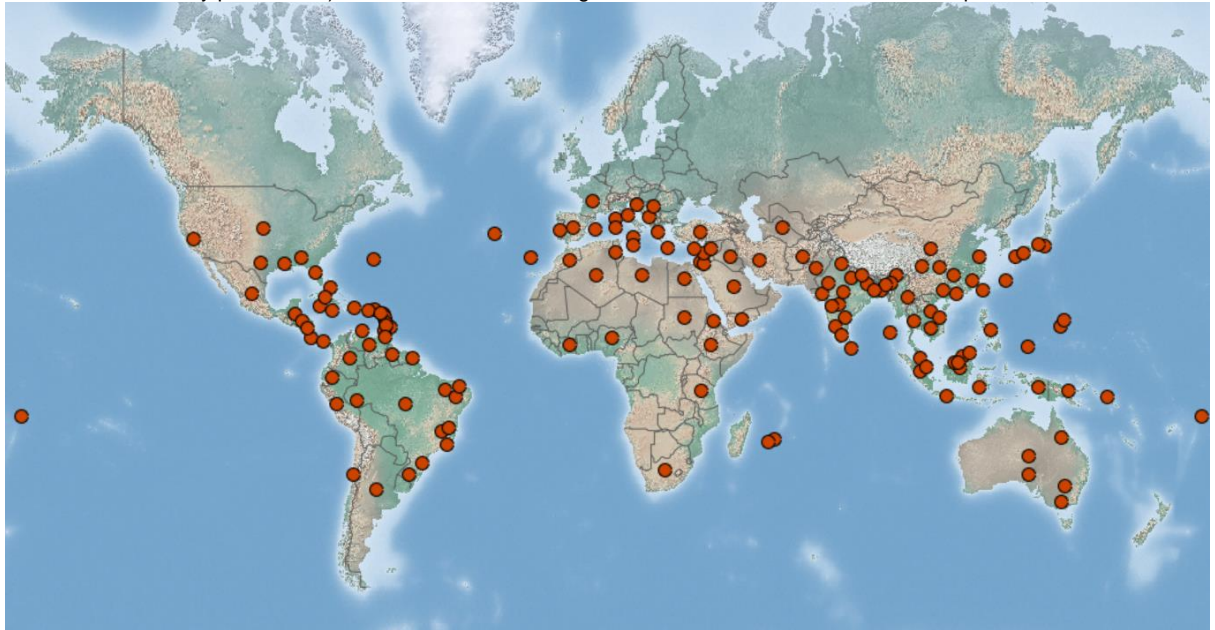

941

942

943

944

Distribution map from: CABI, 2018. *Phyllocnistis citrella*. In: Invasive Species Compendium. Wallingford, UK: CAB International. [www.cabi.org/isc](http://www.cabi.org/isc).  
Printed with permission.

945 30. Spotted stem borer (*Chilo partellus*) Lepidoptera: Crambidae (Swinhoe 1885)

946

947 The spotted stem borer (*Chilo partellus*) is one of a complex of stem borer  
948 species that severely constrain maize production in Africa (de Groot 2002, Kfir  
949 et al. 2002). It is unique amongst these species in that it is invasive across the  
950 continent, having originated in India. Thus, there has been considerable interest  
951 in this invasion process and the role of climatic factors in determining its current  
952 and potential range (Kfir et al. 2002, Overholt et al. 2000), which, as of 2002  
953 included Ethiopia, Sudan, Somalia, Kenya, Tanzania, Uganda, Mozambique,  
954 South Africa, Swaziland, Lesotho, Zimbabwe, Zambia, Malawi, and Botswana.  
955 This species alone can account for 50% yield losses in sorghum and it is a major  
956 target of pest management efforts, including the development of 'push-pull'  
957 technologies, which have proven successful in many contexts (Pickett et al.  
958 2014). The ecological impact of this species is little studied. There is evidence  
959 that this invasive species has displaced native borers in native grasses in Kenya  
960 (Kfir 1997, Overholt 2008) raising the possibility that it could disrupt native  
961 grassland communities elsewhere in its invaded range (Mutamiswa et al. 2017).  
962 Overall, the climatic niche of this species appears to be well validated and  
963 supported by current distributions. Climatic models employed in 2000 predicted  
964 its eventual establishment in Namibia, Angola and parts of Nigeria, Cameroon,  
965 Togo, Benin, Ghana and Ivory Coast (Overholt et al. 2000), which has come to  
966 pass in some of these areas. Climate models predict that warming temperatures  
967 will facilitate its invasion and establishment at higher elevations where it does not  
968 occur presently (see also Tamir et al. 2012), but that it also could disappear from  
969 low lying regions where higher temperatures will constrain it ecologically (Khadioli  
970 et al. 2014). In some areas, warming will facilitate an increase in the number of  
971 generations of the pest per year (Khadioli et al. 2014). Although the pest has  
972 expanded its range to some uplands where it previously did not occur (Ong'amo  
973 et al. 2006), it is not clear whether this has been facilitated by the warming trend  
974 in the continent, or is the result of continued invasion with possible local  
975 adaptation by spotted stem borer populations.

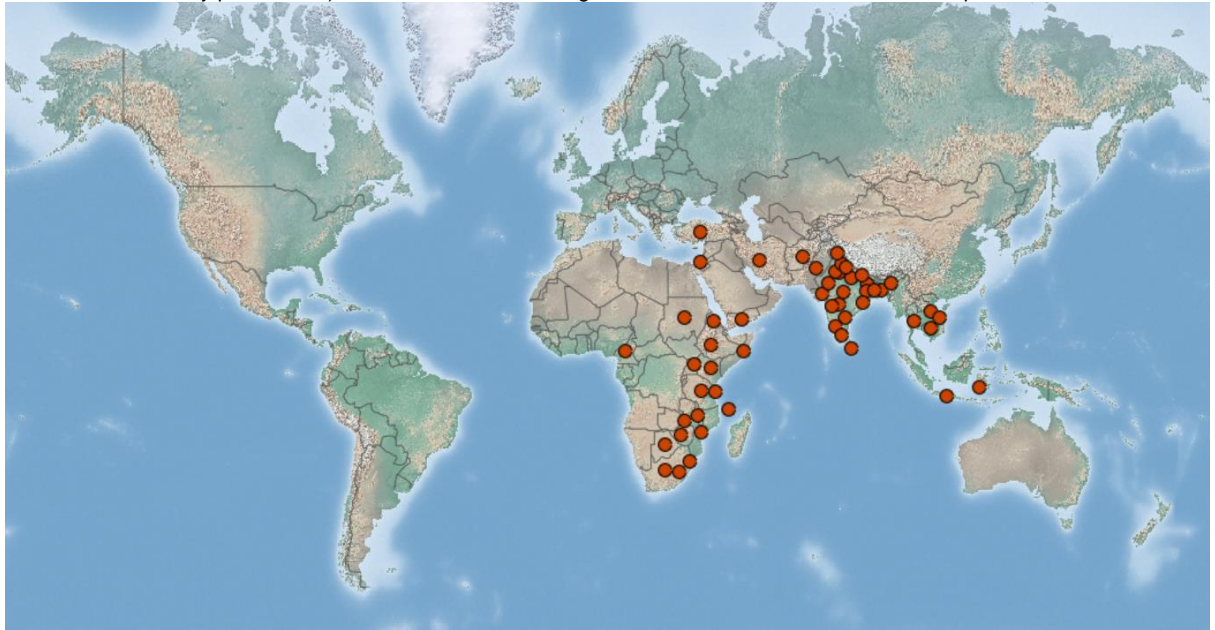

976

977

978

979

Distribution map from: CABI, 2018. *Chilo partellus*. In: Invasive Species Compendium. Wallingford, UK: CAB International. [www.cabi.org/isc](http://www.cabi.org/isc). Printed with permission.

980 31. Green peach aphid (*Myzus persicae*) Hemiptera: Aphididae (Sulzer 1776)

981

982 The Green peach aphid, *Myzus persicae*, is a global pest of Asian origin which  
983 occurs on over 40 different plant families (including many economically important  
984 plants). It has a complex geographically varying life-history strategy which varies  
985 between Heteroecious holocyclic in temperate climates and anholocyclic in most  
986 tropical climates (Blackman 1974). Holocyclic populations reproduce sexually and  
987 overwinter on *Prunus* species, while summer generations reproduce asexually on  
988 a wide variety of hosts. The overwintering eggs are extremely cold tolerant  
989 (Strathdee et al. 1995). Anholocyclic populations exist where winters are mild and  
990 mostly reproduce asexually on a variety of hosts; however also sexual  
991 reproduction exists to some degree in most populations (Blackman 1974). The  
992 most detrimental feature of *M. persicae* is its role as a virus vector, as it can  
993 transmit over 100 plant virus diseases which affect plants from over 30 families.  
994 Mild climates are directly linked to increased population densities, increasing  
995 numbers of generations and outbreak frequencies which lead to increased overall  
996 damage (Bale and Hayward 2010) and have been documented during the past  
997 60 years in northern Europe (Harrington et al. 2007). While not studied to the  
998 same degree, absence of an equal effect on the predators of the aphids suggests  
999 decreased predation pressure under warmer climates (Bale and Hayward 2010).

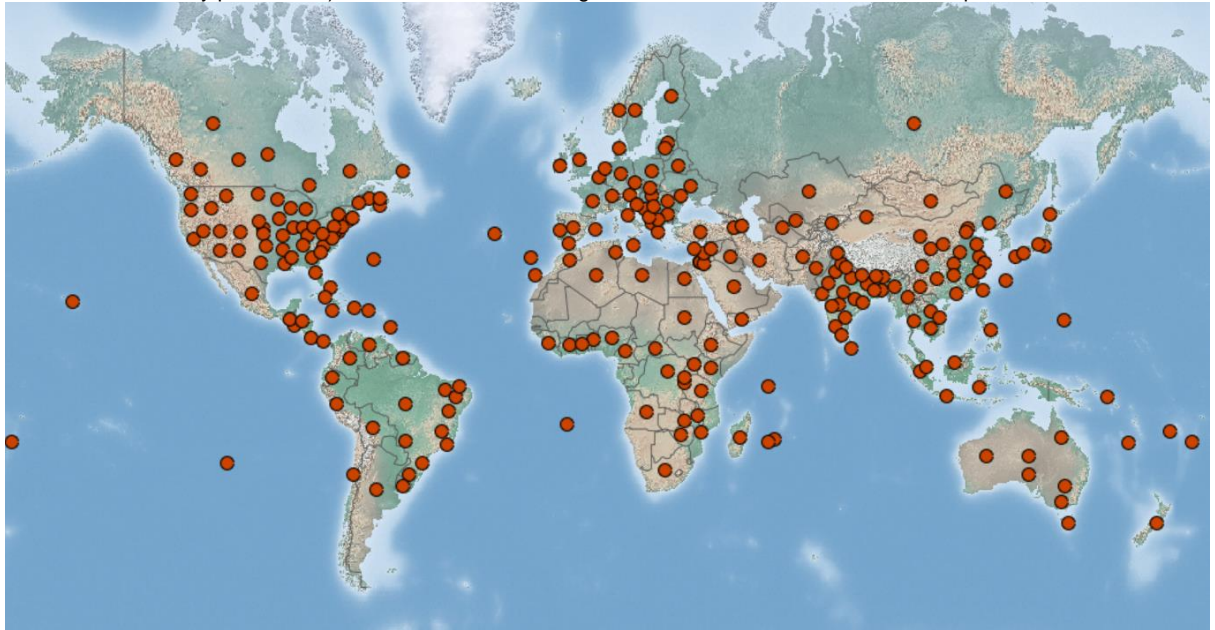

1000  
1001  
1002  
1003

Distribution map from: CABI, 2018. *Myzus persicae*. In: Invasive Species Compendium. Wallingford, UK: CAB International. [www.cabi.org/isc](http://www.cabi.org/isc). Printed with permission.

1004 **References for Supplement 2**

- 1005 Alford, D.V. 2003. Biocontrol of Oilseed Rape Pests. Oxford, UK: Blackwell  
1006 Publishing.
- 1007 Allsopp, P. G. 1996. Japanese beetle, *Popillia japonica* Newman (Coleoptera:  
1008 Scarabaeidae): rate of movement and potential distribution of an immigrant  
1009 species. *The Coleopterists Bulletin*. 50, 81-95.
- 1010 Alyokhin, A.V. 2009. Colorado potato beetle management on potatoes: current  
1011 challenges and future prospects. *Fruit, Vegetable and Cereal Science and*  
1012 *Biotechnology*. 3, 10-19.
- 1013 Ammunet, T., Kaukoranta, T., Saikkonen, K., Repo, T., Klemola, T. 2012. Invading  
1014 and resident defoliators in a changing climate: cold tolerance and predictions  
1015 concerning extreme winter cold as a range-limiting factor. *Ecological Entomology*.  
1016 37, 212-220.
- 1017 Andrade TO, Krespi L, Bonnardot V, van Baaren J, Outreman Y. 2016. Impact of  
1018 change in winter strategy of one parasitoid species on the diversity and function  
1019 of a guild of parasitoids. *Oecologia*, 180, 877-888.
- 1020 Aragón, P., Lobo, J.M. 2012. Predicted effect of climate change on the invasibility  
1021 and distribution of the Western corn root-worm. *Agricultural and Forest*  
1022 *Entomology*. 14, 13-18.
- 1023 Asch van, M., Salis, L., Holleman, L.J.M, van Lith, B., Visser, M.E. 2013.  
1024 Evolutionary response of the egg hatching date of a herbivorous insect under  
1025 climate change. *Nature Climate Change*. 3, 244-248.
- 1026 Assefa, Y., Conlong, D.E., Van Den Berg, J., Le Ru, B.P. 2008. The wider  
1027 distribution of *Eldana saccharina* (Lepidoptera: pyralidae) in South Africa and its  
1028 potential risk to maize production. *Proceedings of the South African Sugar*  
1029 *Technologists Association*. 81, 290-297.
- 1030 Assefa, Y., Mitchell, A., Conlong, D.E. 2006. Phylogeography of *Eldana saccharina*  
1031 Walker (Lepidoptera: Pyralidae). *Annales de la Société Entomologique de*  
1032 *France*. 42, 331-337.
- 1033 Atkinson, P.R. 1980. On the biology, distribution and natural host plants of *Eldana*  
1034 *saccharina* Walker (Lepidoptera: Pyralidae). *Journal of the Entomological Society*  
1035 *of Southern Africa*. 43, 171-194.
- 1036 Awmack, C., Leather, S.R. 2007. Growth and development. Pages 135–151 in Van  
1037 Emden, H., Harrington, R. (eds.). *Aphids as crop pests*. CABI Publishing,  
1038 Wallingford, Oxfordshire, UK.

- 1039 Battisti, A., Stastny, M., Netherer, S., Robinet, C., Schopf, A., Roques, A., Larsson,  
1040 S. 2005. Expansion of geographic range in the pine processionary moth caused  
1041 by increased winter temperatures. *Ecological Applications*. 15, 2084-2096.
- 1042 Battisti, A., Stastny, M., Buffo, E., Larsson, S. 2006. A rapid altitudinal range  
1043 expansion of the pine processionary moth produced by the 2003 climatic  
1044 anomaly. *Global Change Biology*. 12, 4, 662-671.
- 1045 Battisti A, Larsson S, Roques A. 2017. Processionary Moths and Associated  
1046 Urtication Risk: Global Change–Driven Effects. *Annual Review of Entomology*,  
1047 62, 323-42.
- 1048 Bale, J.S., Hayward, S.A.L. 2010. Insect overwintering in a changing climate.  
1049 *Journal of Experimental Biology* 213, 980-994.
- 1050 Baufeld, P., S. Enzian, and G. Motte. 1996. Establishment potential of *Diabrotica*  
1051 *virgifera* in Germany. *EPPO Bulletin*. 26, 511-518.
- 1052 Bebber, D.P., Ramatowski, M.A.T and Gurr, S.J. 2013. Crop pests and pathogens  
1053 move polewards in a warming world. *Nature Climate Change*. 3, 985-988.
- 1054 Bell et al. 2015. Long-term phenological trends, species accumulation rates, aphid  
1055 traits and climate: five decades of change in migrating aphids. *Journal of Animal*  
1056 *Ecology*. 84, 21-34.
- 1057 Bentz, B.J., Régnière, J., Fettig, C.J., Hansen, E.M., Hayes, J.L., Hicke, J.A., Kelsey  
1058 R.G., Negrón J.F.; Seybold, S.J. 2010. Climate change and bark beetles of the  
1059 western United States and Canada: direct and indirect effects. *BioScience* 60,  
1060 602-613.
- 1061 Bentz BJ, Duncan JP, Powell JA. 2016. Elevational shifts in thermal suitability for  
1062 mountain pine beetle population growth in a changing climate. *Forestry*, 89, 271-  
1063 283.
- 1064 Bermond, G., M. Ciosi, E. Lombaert, A. Blin, M. Boriani, L. Furlan, S. Toepfer, and  
1065 T. Guillemaud. 2012. Secondary Contact and Admixture between Independently  
1066 Invading Populations of the Western Corn Rootworm, *Diabrotica virgifera virgifera*  
1067 in Europe. *PLoS ONE*. 7, e50129.
- 1068 Berzitis EA, Minigan JN, Hallet RH, Newman JA 2014. Climate and host plant  
1069 availability impact the future distribution of the bean leaf beetle (*Cerotoma*  
1070 *trifurcata*). *Global Change Biology*, 20, 2778–2792.
- 1071 Blackman, R. L., and V. F. Eastop. 2000. Aphids on the world's crops: an  
1072 identification and information guide, second edition. Wiley, Chichester.
- 1073 Blackman, R. L., and V. F. Eastop. 2008. Aphids on the world's herbaceous plants  
1074 and shrubs. John Wiley & Sons.



- 1075 Bleszynski, S. 1970. A revision of the world species of *Chilo* Zincken (Lepidoptera:  
1076 Pyralidae) Bulletin of the British Museum (Natural History), B. Entomology. 25, 4,  
1077 101-195.
- 1078 Boman, S., Grapputo, A., Lindström, L., Lyytinen, A. and Mappes, J. 2008.  
1079 Quantitative genetic approach for assessing invasiveness: geographic and  
1080 genetic variation in life-history traits. Biological Invasions. 10, 1135-1145.
- 1081 Bommarco, R., S. Wetterlind, and R. Sigvald. 2007. Cereal aphid populations in  
1082 non-crop habitats show strong density dependence. Journal of Applied Ecology.  
1083 44, 1013-1022.
- 1084 Brázdil R, Řezníčková L, Valášek H, Kiss A, Kotyza O 2014. Past locust outbreaks  
1085 in the Czech Lands: do they indicate particular climatic patterns? Theoretical and  
1086 Applied Climatology. 116, 343-357.
- 1087 Buffo, E., Battisti, A., Stastny, M., Larsson, S. 2007. Temperature as a predictor of  
1088 survival of the pine processionary moth in the Italian Alps. Agricultural and Forest  
1089 Entomology. 9, 65-72.
- 1090 Chagas, M.C.M. and Parra, J.R.P., 2000. *Phyllocnistis citrella* Stainton  
1091 (Lepidoptera: Gracillariidae): Técnica de Criação e Biologia em Diferentes  
1092 Temperaturas Anais da Sociedade Entomológica do Brasil. 29, 2, 227-235.
- 1093 Chapman, J.W., Reynolds, D.R., Smith, A.D., Riley, J.R., Pedgley, D.E., Woiwod,  
1094 I.P. 2002. High-altitude migration of the diamondback moth *Plutella xylostella* to  
1095 the U.K.: a study using radar, aerial netting, and ground trapping. Ecological  
1096 Entomology. 27, 641-650.
- 1097 Chapuis M, Lecoq M, Michalakis Y, Loiseau A, Sword GA, Piry S, Estoup A 2008.  
1098 Do outbreaks affect genetic population structure? A worldwide survey in *Locusta*  
1099 *migratoria*, a pest plagued by microsatellite null alleles. Molecular Ecology. 17,  
1100 3640-3653.
- 1101 Chiang HC, Hudson AC. 1972. Population fluctuations of the European corn borer,  
1102 *Ostrinia nubilalis*, at Waseca, Minnesota, 1948-1970. Environmental Entomology.  
1103 1, 7-16.
- 1104 Ciosi, M., N. J. Miller, K. S. Kim, R. Giordano, A. Estoup, and T. Guillemaud. 2008.  
1105 Invasion of Europe by the western corn rootworm, *Diabrotica virgifera virgifera*:  
1106 multiple transatlantic introductions with various reductions of genetic diversity.  
1107 Molecular Ecology. 17, 3614-3627.
- 1108 Clua, A., A. M. Castro, S. Ramos, D. O. Gimenez, A. Vasicek, H. O. Chidichimo,  
1109 and A. F. G. Dixon. 2004. The biological characteristics and distribution of the  
1110 greenbug, *Schizaphis graminum*, and Russian wheat aphid, *Diuraphis noxia* in  
1111 Argentina and Chile. European Journal of Entomology. 101, 193-198.

- 1112 Collier R, Fellows, J., Adams, S., Semenov, M., Thomas, B. 2008. Vulnerability of  
1113 horticultural crop production to extreme weather events. *Aspects of Applied*  
1114 *Biology*. 88, 1-14.
- 1115 Coulson, S.J., Hodkinson, I.D., Webb, N.R., Mikkola, K., Harrison, J.A., and  
1116 Pedgley, D.E., 2002. Aerial colonization of high Arctic islands by invertebrates :  
1117 the diamondback moth *Plutella xylostella* ( *Lepidoptera* : *Yponomeutidae* ) as a  
1118 potential indicator species. *Diversity and Distributions*. 8, 6, 327-334.
- 1119 Coyette, C. (ed) 2012. *Agriculture, fishery and forestry statistics*. Eurostat  
1120 Pocketbooks, EU, Luxembourg.
- 1121 Cudmore, T.J., Björklund, N., Carroll, A.L., Lindgren, B.S. 2010. Climate change  
1122 and range expansion of an aggressive bark beetle: evidence of higher beetle  
1123 reproduction in naive host tree populations. *Journal of Applied Ecology*. 47, 1036-  
1124 1043.
- 1125 Curnutte, L. B., A. M. Simmons, and S. Abd-Rabou. 2014. Climate change and  
1126 *Bemisia tabaci* (Hemiptera: Aleyrodidae): Impacts of temperature and carbon  
1127 dioxide on life history. *Annals of the Entomological Society of America*. 107, 933-  
1128 943.
- 1129 Damon, A., 2000. A review of the biology and control of the coffee berry borer,  
1130 *Hypothenemus hampei* (Coleoptera: Scolytidae). *Bulletin of Entomological*  
1131 *Research*. 90, 453-465.
- 1132 Danilevskij, A.S. 1965. *Photoperiodism and seasonal development of insects*. Oliver  
1133 and Boyd, London, Great Britain.
- 1134 Davis, T. S., J. Abatzoglou, N. A. Bosque-Pérez, S. E. Halbert, K. Pike, and S. D.  
1135 Eigenbrode. 2014. Differing contributions of density dependence and climate to  
1136 the population dynamics of three eruptive herbivores. *Ecological Entomology*. 39,  
1137 566-577.
- 1138 De Barro, P., S. Liu, L. Boykin, and A. Dinsdale. 2011. *Bemisia tabaci*: a statement  
1139 of species status. *Annual Review of Entomology*. 56, 1-19.
- 1140 De Groot, H. 2002. Maize yield losses from stem borers in Kenya. *Insect Science*  
1141 *and Its Application*. 22, 89-96.
- 1142 DeLucia, E. H., P. D. Nability, J. A. Zavala, and M. R. Berenbaum. 2012. Climate  
1143 Change: Resetting Plant-Insect Interactions. *Plant Physiology*. 160, 1677-1685.
- 1144 Dermody, O., B. F. O'Neill, A. R. Zangerl, M. R. Berenbaum, and E. H. DeLucia.  
1145 2008. Effects of elevated CO<sub>2</sub> and O<sub>3</sub> on leaf damage and insect abundance in a  
1146 soybean agroecosystem. *Arthropod-Plant Interactions*. 2, 125-135.

- 1147 Dhaliwal GS, Vikas Jindal, Dhawan AK. 2010. Insect pest problems and crop  
1148 losses: changing trends. *Indian Journal of Ecology*. 37, 1-7.
- 1149 Dick, J., 1945. Some data on the biology of the sugarcane borer (*Eldana saccharina*  
1150 Wlk). *Proceedings of the South African Sugar Technologists' Association*. 19, 75-  
1151 79.
- 1152 Dodds KJ, Aoki CF, Arango-Velez A, Cancelliere J, D'Amato AW, DiGirolomo M,  
1153 Rabaglia R. 2018. Expansion of Southern Pine Beetle into Northeastern Forests:  
1154 Management and Impact of a Primary Bark Beetle in a New Region. *Journal of*  
1155 *Forestry*, 116, 178-191.
- 1156 Dorn, S., Schumacher, P., Abivardi, C., Meyhoefer, R., 1999. Global and regional  
1157 pest insects and their antagonists in orchards: spatial dynamics. *Agriculture,*  
1158 *Ecosystems and Environment*. 73, 111-118.
- 1159 Dossall, L.M. et al. 2001. The origins of infestations of diamondback moth, *Plutella*  
1160 *xylostella* (L.), in canola in western Canada. In *The management of diamondback*  
1161 *moth and other crucifer pests. Proceedings of the 4th International Workshop,*  
1162 *Nov. 2001, Melbourne, Australia*. pp. 95-100.
- 1163 Duehl, A.J., Koch, F.H., Hain, F.P. 2011. Southern pine beetle regional outbreaks  
1164 modeled on landscape, climate and infestation history. *Forest Ecology and*  
1165 *Management*. 261, 473-479.
- 1166 Elkinton, J. S., A. Liebhold, G. H. Boettner, and M. Sremac. 2014. Invasion spread  
1167 of *Operophtera brumata* in northeastern United States and hybridization with *O-*  
1168 *bruceata*. *Biological Invasions*. 16, 2263-2272.
- 1169 El Iraqui S, Hmimina M. 2016. Impact of Temperatures on the Voltinism of *Cydia*  
1170 *pomonella* (Lepidoptera: Tortricidae). *Annals of the Entomological Society of*  
1171 *America*. 109, 698-704.
- 1172 Fajyan, M. A. & Wood, J. M. 1996. Stand structure and development after gypsy  
1173 moth defoliation in the Appalachian Plateau. *Forest Ecology and Management*.  
1174 89, 79-88.
- 1175 Finlay, K. J., and J. E. Luck. 2011. Response of the bird cherry-oat aphid  
1176 (*Rhopalosiphum padi*) to climate change in relation to its pest status, vectoring  
1177 potential and function in a crop–vector–virus pathosystem. *Agriculture,*  
1178 *Ecosystems and Environment*. 144, 405-421.
- 1179 Fitzpatrick, M.C., Preisser, E.L., Porter, A., Elkington, J. Ellison, A.M. 2012. Modeling  
1180 range dynamics in heterogeneous landscapes: invasion of the hemlock woolly  
1181 adelgid in eastern North America. *Ecological Applications*, 22, 2, 472-486.
- 1182 Fleming, W. E. 1972. *Biology of the Japanese beetle*. U.S. Department of  
1183 *Agriculture*.

- 1184 Fleming, W. E. 1976. Integrating control of the Japanese beetle: a historical review.  
1185 (U. S. A. R. Service, Ed.). U.S. Dept. of Agriculture, Agricultural Research  
1186 Service.
- 1187 Friedenber, N.A., Sarkar, S., Kouchoukos, N., Billings, R.F., Ayres, M.P. 2008.  
1188 Temperature extremes, density dependence, and southern pine beetle  
1189 (Coleoptera: Curculionidae) population dynamics in east Texas. *Environmental*  
1190 *Entomology*. 37, 3, 650-659.
- 1191 Fält-Nardmann JJJ, Klemola T, Ruohomäki K, Niemelä P, Roth M, Saikkonen K.  
1192 2018a. Local adaptations and phenotypic plasticity may render gypsy moth and  
1193 nun moth future pests in northern European boreal forests. *Canadian Journal of*  
1194 *Forest Research*: 48, 265-276.
- 1195 Fält-Nardmann JJJ, Tikkanen O, Ruohomäki K, Otto L, Leinonen R, Pöyry J,  
1196 Saikkonen K, Neuvonen S. 2018b. The recent northward expansion of *Lymantria*  
1197 *monacha* in relation to realized changes in temperatures of different seasons.  
1198 *Forest Ecology and Management*, 427, 96-105.
- 1199 Fält-Nardmann JJJ, Ruohomäki K, Tikkanen O.-P, Neuvonen S. 2018. Cold  
1200 hardiness of *Lymantria monacha* and *L. dispar* (Lepidoptera: Erebidae) eggs to  
1201 extreme winter temperatures: implications for predicting climate change impacts.  
1202 *Ecological Entomology*, 43: 422-430.
- 1203 Gan, J. 2004. Risk and damage of southern pine beetle outbreaks under global  
1204 climate change. *Forest Ecology and Management*. 191, 61-71.
- 1205 Gassmann, A. J. 2012. Field-evolved resistance to Bt maize by western corn  
1206 rootworm: Predictions from the laboratory and effects in the field. *Journal of*  
1207 *Invertebrate Pathology*. 110, 287-293.
- 1208 Ghini, R., Hamada, E., José, M., Júnior, P., and Marengo, J.A., 2008. Risk analysis  
1209 of climate change on coffee nematodes and leaf miner in Brazil. *Pesquisa*  
1210 *Agropecuária Brasileira*, 43, 2, 187-194.
- 1211 Gilioli, G., S. Pasquali, S. Parisi, and S. Winter. 2014. Modeling the potential  
1212 distribution of *Bemisia tabaci* in Europe in light of the climate change scenario.  
1213 *Pest Management Science*. 70, 1611-1623.
- 1214 Gottwald, T.R. 2000. Citrus canker. *The Plant Health Instructor*. DOI: 10.1094/PHI-I-  
1215 2000-1002-01.
- 1216 Grafton-Cardwell, E.E., Kearney, U.C., Headrick, D.H., Poly, C., Luis, S., and Mauk,  
1217 P.A., 2008. ANR publication 8321: Citrus Leafminer and Citrus Peelminer.  
1218 Oakland, California.

- 1219 Gray, D.R., Regniere, J. & Boulet, B. 2000. Analysis and use of historical patterns of  
1220 spruce budworm defoliation to forecast outbreak patterns in Quebec. *Forest*  
1221 *Ecology and Management*. 127, 217-231.
- 1222 Gray, D.R. 2013. The influence of forest composition and climate on outbreak  
1223 characteristics of spruce budworm in Canada. *Canadian Journal of Forest*  
1224 *Research*. 43, 1181-1195.
- 1225 Grégoire J-C, Evans HF. 2004. Damage and control of Bawbilt organisms - an  
1226 overview. In: *Bark and wood boring insects in living trees in Europe, a synthesis*.  
1227 Dordrecht: Kluwer Academic Publishers. p. 19-37.
- 1228 Gu, H. 2009. Cold tolerance and overwintering of the diamondback moth  
1229 (Lepidoptera: Plutellidae) in southeastern Australia. *Environmental Entomology*.  
1230 38, 524-529.
- 1231 Guillén, M., Heraty, J.M., Luck, R.F., Heraty, J.M., and Luck, R.F. 2003. Seasonal  
1232 variation and infestation incidence by *Marmara gulosa* (Lepidoptera :  
1233 Gracillariidae ) on grapefruit in the Coachella Valley, California. *Journal of*  
1234 *Economic Entomology*. 96, 3, 577-583.
- 1235 Gumpertz, M.L., Wu, C-T., Pye, J.M. 2000. Logistic regression for southern pine  
1236 beetle outbreaks with spatial and temporal autocorrelation. *Forest Science*. 46, 1,  
1237 95-107.
- 1238 Gutierrez et al. 2009. Effects of climate warming on Olive and olive fly (*Bactrocera*  
1239 *oleae* (Gmelin)) in California and Italy. *Climate Change*. 95, 195-217.
- 1240 Gröbler BC, Lewis OT 2008. Response of native parasitoids to a range-expanding  
1241 host. *Ecological Entomology*. 33, 453-463.
- 1242 Hakala, K, Hannukkala, A.O., Huusela-Veistola, E., Jalli, M. and Peltonen-Sainio, P.  
1243 2011. Pests and diseases in a changing climate: a major challenge for Finnish  
1244 crop production. *Agricultural and Food Science*. 20, 3-14.
- 1245 Halbert, S. E., and D. J. Voegtlin. 1998. Evidence for North American origin of  
1246 *Rhopalosiphum*. Pages 351-356 in J. M. Nieto Nafria and A. F. G. Dixon, editors.  
1247 *Aphids in natural and managed ecosystems*. Universidad de León, León (Spain).
- 1248 Hamilton, J. G., O. Dermody, M. Aldea, A. R. Zangerl, A. Rogers, M. R. Berenbaum,  
1249 and E. H. Delucia. 2005. Anthropogenic changes in tropospheric composition  
1250 increase susceptibility of soybean to insect herbivory. *Environmental Entomology*.  
1251 34, 479-485.
- 1252 Haridas CV, Meinke LJ, Hibbard BE, Siegfried BD, Tenhumberg B. 2016. Effects of  
1253 temporal variation in temperature and density dependence on insect population  
1254 dynamics. *Ecosphere*, 7, e01287.

- 1255 Harrington R, Clark SJ, Welham SJ, Verrier PJ, Denholm CH, Hullé M, Maurice D,  
1256 Rounsevell MDA, Cocu N and EU, EXAMINE Consortium 2007. Environmental  
1257 change and the phenology of European aphids. *Glob. Change Biol.* 13, 1550-  
1258 1564.
- 1259 Held, D. W., and D. A. Potter. 2004. Floral affinity and benefits of dietary mixing with  
1260 flowers for a polyphagous scarab, *Popillia japonica* Newman. *Oecologia.* 140,  
1261 312–320.
- 1262 Hokkanen H 2000. The making of a pest: recruitment of *Meligethes aeneus* onto  
1263 oilseed Brassicas. *Entomologia Experimentalis et Applicata.* 95, 141-149.
- 1264 Hoover JK, Newman JA 2004. Tritrophic interactions in the context of climate  
1265 change: a model of grasses, cereal aphids and their parasitoids. *Global Change*  
1266 *Biology.* 10, 1197-1208.
- 1267 Hsiao, T.H. 1985. Eco-physiological and genetic aspects of geographic variations of  
1268 the Colorado potato beetle. *Research bulletin - Massachusetts Agricultural*  
1269 *Experiment Station.* 704, 63-77.
- 1270 Hughes, R.D., Maywald, G.F. 1990. Forecasting the favourableness of the  
1271 Australian environment for the Russian wheat aphid, *Diuraphis noxia*  
1272 (Homoptera: Aphididae), and its potential impact on Australian wheat yields.  
1273 *Bulletin of Entomological Research,* 80, 165-175.
- 1274 Ingwell LL, Eigenbrode SD, Bosque-Pérez NA 2012. Plant viruses alter insect  
1275 behavior to enhance their spread. *Scientific Reports.* 578, doi:10.1038/srep00578
- 1276 Jaramillo, J., Borgemeister, C., Baker, P.S., 2006. Coffee berry borer  
1277 *Hypothenemus hampei* (Coleoptera: Curculionidae): searching for sustainable  
1278 control strategies. *Bull Entomol Res.* 96, 223-233.
- 1279 Jaramillo, J., Chabi-Olaye, A., Kamonjo, C., Jaramillo, A., Vega, F.E., Poehling, H.,  
1280 Borgemeister, C. 2009. Thermal tolerance of the Coffee Berry Borer  
1281 *Hypothenemus hampei*: Predictions of climate change impact on a tropical insect  
1282 pest. *PLoS ONE,* 4, e6487.
- 1283 Jaramillo, J., Muchugu, E., Vega, F.E., Davis, A., Borgemeister, C. 2011. Some like  
1284 it hot: The influence and implications of climate change on Coffee Berry Borer  
1285 (*Hypothenemus hampei*) and Coffee Production in East Africa. *PLoS ONE,* 6,  
1286 e24528.
- 1287 Jepsen, J. U., S. B. Hagen, R. A. Ims, and N. G. Yoccoz. 2008. Climate change and  
1288 outbreaks of the geometrids *Operophtera brumata* and *Epirrita autumnata* in sub-  
1289 arctic birch forest: evidence of a recent outbreak range expansion. *Journal of*  
1290 *Animal Ecology,* 77, 257-264.

- 1291 Jepsen, J. U., S. B. Hagen, K. A. Hogda, R. A. Ims, S. R. Karlsen, H. Tommervik,  
1292 and N. G. Yoccoz. 2009a. Monitoring the spatio-temporal dynamics of geometrid  
1293 moth outbreaks in birch forest using MODIS-NDVI data. *Remote Sensing of*  
1294 *Environment*. 113, 1939-1947.
- 1295 Jepsen, J. U., S. B. Hagen, S. R. Karlsen, and R. A. Ims. 2009b. Phase-dependent  
1296 outbreak dynamics of geometrid moth linked to host plant phenology.  
1297 *Proceedings of the Royal Society B-Biological Sciences*. 276, 4119-4128.
- 1298 Jepsen, J. U., M. Biuw, R. A. Ims, L. Kapari, T. Schott, O. P. L. Vindstad, and S. B.  
1299 Hagen. 2013. Ecosystem impacts of a range expanding forest defoliator at the  
1300 forest-tundra ecotone. *Ecosystems*, 16, 561-575.
- 1301 Jones, J. 2001. Citrus peelminer fact sheet. Cotton Cooperative Extension.  
1302 (Accessed 31.03.2018).
- 1303 Juszczak, R., Kuchar, L., Leśny, J., Olejnik, J. 2013. Climate change impact on  
1304 development rates of the codling moth (*Cydia pomonella* L.) in the Wielkopolska  
1305 region, Poland. *Int J Biometeorol*. 57, 31-44.
- 1306 Jönsson AM, Harding S, Krokene P, Lange H, Lindelow A, Økland B, Ravn HP,  
1307 Schroeder LM. 2011. Modeling the potential impact of global warming on *Ips*  
1308 *typographus* voltinism and reproductive diapause. *Climatic Change*. 109, 695-  
1309 718.
- 1310 Jönsson, A.M., Pulatov, B., Linderson, M. and Hall, K. 2013. Modeling as a tool for  
1311 analyzing the temperature-dependent future of the Colorado potato beetle in  
1312 Europe. *Global Change Biology*. 19, 1043-1055.
- 1313 Katis, N., and R. W. Gibson. 1985. Transmission of Potato virus Y by cereal aphids.  
1314 *Potato Research*. 28, 65-70.
- 1315 Kaukonen, M., A. L. Ruotsalainen, P. R. Wali, M. K. Männistö, H. Setälä, K.  
1316 Saravesi, K. Huusko, and A. Markkola. 2013. Moth herbivory enhances resource  
1317 turnover in subarctic mountain birch forests? *Ecology*. 94, 267-272.
- 1318 Kerdelhué, C., Zane, L., Simonato, M., Salvato, P., Rousselet, J., Roques, A. and  
1319 Battisti, A. 2009. Quaternary history and contemporary patterns in a currently  
1320 expanding species. *BMC Evolutionary Biology*. 9, 220.
- 1321 Keszthelyi S, Nowinsky L, Puskas J. 2013. The growing abundance of *Helicoverpa*  
1322 *armigera* in Hungary and its areal shift estimation. *Central European Journal of*  
1323 *Biology*. 8, 756-764.
- 1324 Keszthelyi S. 2010. Flight dynamics analysis of the European corn borer (*Ostrinia*  
1325 *nubilalis* (Hubner)) populations in Hungary from the second part of the twentieth  
1326 century until the present. *Archives of Phytopathology and Plant Protection*. 43,  
1327 1286-1294.

- 1328 Kfir, R. 1997. Competitive displacement of *Busseola fusca* (Lepidoptera: Noctuidae)  
1329 by *Chilo partellus* (Lepidoptera: Pyralidae). *Annals of the Entomological Society*  
1330 of America. 90, 619-624.
- 1331 Kfir, R., W. A. Overholt, Z. R. Khan, and A. Polaszek. 2002. Biology and  
1332 management of economically important lepidopteran cereal stem borers in Africa.  
1333 *Annual Review of Entomology*. 47, 701-713.
- 1334 Khadioli, N., Z. E. H. Tonnang, E. Muchugu, G. Ong'amo, T. Achia, I. Kipchirchir, J.  
1335 Kroschel, and B. L. Ru. 2014. Effect of temperature on the phenology of *Chilo*  
1336 *partellus* (Swinhoe) (Lepidoptera, Crambidae); simulation and visualization of the  
1337 potential future distribution of *C. partellus* in Africa under warmer temperatures  
1338 through the development of life-table parameters. *Bulletin of Entomological*  
1339 *Research*. 104, 809-822.
- 1340 Kiritani K. 2006. Predicting impacts of global warming on population dynamics and  
1341 distribution of arthropods in Japan. *Population Ecology*. 48, 5-12.
- 1342 Kleynhans, E., Conlong, D.E., Terblanche, J.S., 2014a. Host plant-related variation  
1343 in thermal tolerance of *Eldana saccharina* (Lepidoptera: Pyralidae). *Entomologia*  
1344 *Experimentalis et Applicata*. 150, 113-122.
- 1345 Kleynhans, E., Mitchell, K.A., Conlong, D.E., Terblanche, J.S., 2014b. Evolved  
1346 variation in cold tolerance among populations of *Eldana saccharina* (Lepidoptera:  
1347 Pyralidae) in South Africa. *Journal of Evolutionary Biology*. 27, 1149-1159.
- 1348 Kleynhans, E., Conlong, D.E., Terblanche, J.S., 2014c. Direct and indirect effects of  
1349 development temperature on adult water balance traits of *Eldana saccharina*  
1350 (Lepidoptera: Pyralidae). *Journal of Insect Physiology*. 68, 69-75.
- 1351 Kriticos, D.J., Ota, N., Hutchison, W.D., Beddow, J., Walsh, T., Tay, W.T., Paula-  
1352 Moraes, S.V., Czepak, C. & Zalucki, M.P. 2015. The potential distribution of  
1353 invading *Helicoverpa armigera* in North America: Is it just a matter of time? *PLoS*  
1354 *ONE*. 10, 7, e0133224.
- 1355 Lange H, Økland B, Krokene P. 2006. Thresholds in the life cycle of the spruce bark  
1356 beetle under climate change. *Interjournal*. 1648, 1-10.
- 1357 Le Pelley, R.H., 1968. *Pests of coffee*. London: Longmans, Green and Co. Ltd.,  
1358 London.
- 1359 Lee H, Paik C-H, Lee J-H. 2013. Prediction of change in the occurrence of *Chilo*  
1360 *suppressalis* (Lepidoptera: Pyralidae) in paddy fields in the context of new climate  
1361 change scenarios. Abstract in *Proceedings?*
- 1362 Lehmann P, Lyytinen A, Piironen S & Lindström L 2014. Northward range  
1363 expansion requires synchronization of both overwintering behavior and



- 1364 physiology with photoperiod in the invasive Colorado potato beetle (*Leptinotarsa*  
1365 *decehlineata*). *Oecologia*. 176, 57-68.
- 1366 Lehmann P, Lyytinen A, Piironen S, Lindström L 2015. Latitudinal differences in  
1367 diapause related photoperiodic responses of European Colorado potato beetles  
1368 (*Leptinotarsa decehlineata*). *Evolutionary Ecology*. 29, 269-282.
- 1369 Lemoine, N. P., W. A. Drews, D. E. Burkepile, and J. D. Parker. 2013. Increased  
1370 temperature alters feeding behavior of a generalist herbivore. *Oikos*. 122, 1669-  
1371 1678.
- 1372 Lemoine NP, Doublet D, Salminen J, Burkepile DE, Parker JD. 2017. Responses of  
1373 plant phenology, growth, defense, and reproduction to interactive effects of  
1374 warming and insect herbivory. *Ecology*, 98, 1817-1828.
- 1375 Leppanen C & Simberloff D. 2017. Implications of early production in an invasive  
1376 forest pest. *Agricultural and Forest Entomology*, 19, 217-224.
- 1377 Li, Z-Y., Zalucki, M.P., Bao, H-A., Chen, H-Y., Hu, Z-D., Zhang D-Y., Lin, Q-S., Yin,  
1378 F., Wang, M., Feng, X. 2012. Population dynamics and 'outbreaks' of  
1379 Diamondback moth, *Plutella xylostella*, in Guangdong province, China: climate or  
1380 the failure of management? *Journal of Economic Entomology*. 105, 739-752
- 1381 Li, Z-Y., Zalucki, M.P., Yonow, T., Kriticos, D.J., Bao, H-L., Chen, H-Y., Hu, Z-D.,  
1382 Feng, X. & Furlong, M.J. 2016. Population dynamics and management of  
1383 Diamondback moth (*Plutella xylostella*) in China: the relative contributions of  
1384 climate, natural enemies and cropping patterns. *Bulletin of entomological*  
1385 *Research*. 106, 197-214.
- 1386 Liu Z, Xuezheng S, Warner E, Yunjian G, Dongsheng Y, Shaoxiang N, Hongjie W  
1387 2008. Relationship between oriental migratory locust plague and soil moisture  
1388 extracted from MODIS data. *International Journal of Applied Earth Observation*  
1389 *and Geoinformation*. 10, 84-91.
- 1390 Lomelí-Flores JR, Barrera JF, Bernal JS. 2010. Impacts of weather, shade cover  
1391 and elevation on coffee leafminer *Leucoptera coffeella* (Lepidoptera: Lyonetiidae)  
1392 population dynamics and natural enemies. *Crop Protection*. 29, 1039-1048.
- 1393 Lu MX, Cao SS, Liu ZX, Wang X, Du YZ. 2014. Heat tolerance of developmental  
1394 and seasonal stages of *Chilo suppressalis*. *Entomologia Experimentalis et*  
1395 *Applicata*. 152, 91-99.
- 1396 Lu M, Cao S, Du Y, Liu Z, Liu P, Li J 2013. Diapause, signal and molecular  
1397 characteristics of overwintering *Chilo suppressalis* (Insecta: Lepidoptera:  
1398 *Pyralidae*), *Scientific Reports*. 3, 3211

- 1399 Lu M-X, Liu Z-X, Wang X, Du Y-Z. 2012. Seasonal cold hardiness of *Chilo*  
1400 *suppressalis* (Lepidoptera: Pyralidae). *Annals of the Entomological Society of*  
1401 *America*. 105, 479-483.
- 1402 Lu, Z-Z., Zalucki, M.P., Perkins, L., Wang, D-Y., & Wu, L-L. 2013. Towards a  
1403 resistance management strategy for *Helicoverpa armigera* in Bt-cotton in  
1404 northwestern China: potential refuge crops. *Journal of Pest Science*. 86, 695-703.
- 1405 Luedeling, E., Steinmann, K.P., Zhang, M., Brown, P.H., Grant, J., Girvetz, E.H.,  
1406 2011. Climate change effects on walnut pests in California. *Global Change*  
1407 *Biology*. 17, 228-238.
- 1408 Lyytinen, A., Lindström, L. and Mappes, J. 2008. Genetic variation in growth and  
1409 development time under two selection regimes in *Leptinotarsa decemlineata*.  
1410 *Entomologia Experimentalis et Applicata*. 127, 157-167.
- 1411 Ma SJ 1958. The population dynamics of the oriental migratory locust (*Locusta*  
1412 *migratoria manilensis* Meyen) in China. *Acta Entomologica Sinica*. 8, 1-40
- 1413 Maelzer, D.A., Zalucki, M.P., Laughlin, R. 1996. Analysis and interpretation of long  
1414 term light trap data for *Helicoverpa punctigera* (Lepidoptera; Noctuidae) in  
1415 Australia: population changes and forecasting pest pressure. *Bulletin of*  
1416 *Entomological Research*. 86, 547-557.
- 1417 Maelzer, D.A., Zalucki, M.P. 2000. Long range forecasts of the numbers of  
1418 *Helicoverpa punctigera* and *H. armigera* (Lepidoptera: Noctuidae) in Australia  
1419 using the Southern Oscillation Index and the Sea Surface Temperature. *Bulletin*  
1420 *of Entomological Research*. 90, 133-146.
- 1421 Maiorano A, Bregaglio S, Donatelli M, Fumagalli D, Zucchini A. 2012. Comparison  
1422 of modeling approaches to simulate the phenology of the European corn borer  
1423 under future climate scenarios. *Ecological Modeling*. 245, 65-74.
- 1424 Malmstrom CM, Stoner CJ, Brandenburg S, Newton LA. 2006. Virus infection and  
1425 grazing exert counteracting influences on survivorship of native bunchgrass  
1426 seedlings competing with invasive exotics. *Journal of Ecology*. 94, 264-275.
- 1427 Marchi S, Guidotti D, Ricciolini M, Petacchi R. 2016. Towards understanding  
1428 temporal and spatial dynamics of *Bactrocera oleae* (Rossi) infestations using  
1429 decade-long agrometeorological time series. *International Journal of*  
1430 *Biometeorology*, 60, 1681-1694.
- 1431 Marchioro CA, Foerster LA. 2012. Modeling reproduction of *Plutella xylostella* L.  
1432 (*Lepidoptera: Plutellidae*): climate change may modify pest incidence levels. *Bull.*  
1433 *Entomol. Res*. 102, 489-496.

- 1434 Marini L, Ayres MP, Battisti A, Faccoli M. 2012. Climate affects severity and  
1435 altitudinal distribution of outbreaks in an eruptive bark beetle. *Climatic Change*.  
1436 115, 327-341.
- 1437 Marini, L, Økland B, Jönsson, AM, Bentz B, Carroll A, Forster B, Grégoire J, Hurling  
1438 R, Nageleisen LM, Netherer S, Ravn HP, Weed A, Schroeder M. 2017. Climate  
1439 drivers of bark beetle outbreak dynamics in Norway spruce forests. *Ecography*,  
1440 40, 1426-1435.
- 1441 McAvoy TJ, Régnière J, St-Amant R, Schneeberger NF, Salom SM. 2017. Mortality  
1442 and Recovery of Hemlock Woolly Adelgid (*Adelges tsugae*) in Response to  
1443 Winter Temperatures and Predictions for the Future. *Forests*, 8, 497.
- 1444 McNulty, S.G., Lorio, P.L.Jr., Ayres, M.P., Reeve, J.D. 1998. Predictions of southern  
1445 pine beetle populations using a forest ecosystem model. In Micker, R.A., Fox, S.  
1446 (eds) *The Productivity and Sustainability of Southern Forest Ecosystems in a*  
1447 *Changing Environment*. Ecological Studies, Volume 128, Springer, New York,  
1448 USA.
- 1449 Medvinsky AB, Morozov AY, Velkov VV, Li BL, Sokolov MS, Malchow H. 2004.  
1450 Modeling the invasion of recessive Bt-resistant insects: An impact on transgenic  
1451 plants. *Journal of Theoretical Biology*. 231, 121-127.
- 1452 Mendesil, E., Jembere, B., Seyoum, E., 2003. Occurrence of coffee berry borer  
1453 *Hypothenemus hampei* (Ferrari) (Coleoptera: Scolytidae) on *Coffea arabica* L. in  
1454 Ethiopia. *Ethiopian J Biol Sci*. 2, 61-72.
- 1455 Michels, J., and R. Behler. (YEAR) Reproduction and development of *Diuraphis*  
1456 *noxia* (Homoptera: Aphididae) at constant temperatures. *Journal of Economic*  
1457 *Entomology*. 81, 1097-1101.
- 1458 Miller, N., A. Estoup, S. Toepfer, D. Bourguet, L. Lapchin, S. Derridj, K. S. Kim, P.  
1459 Reynaud, L. Furlan, and T. Guillemaud. 2005. Multiple Transatlantic Introductions  
1460 of the Western Corn Rootworm. *Science*. 310, 992-992.
- 1461 Moraal, L.G. and Jagers op Akkerhuis, G.A.J.M. 2011. Changing patterns in insect  
1462 pests on trees in The Netherlands since 1946 in relation to human induced  
1463 habitat changes and climate factors – An analysis of historical data. *Forest*  
1464 *Ecology and Management*. 261, 50-61.
- 1465 Mutamiswa R, Chidawanyika F, Nyamukondiwa C, Nyamukondiwa C. 2017.  
1466 Dominance of spotted stemborer *Chilo partellus* Swinhoe (Lepidoptera:  
1467 Crambidae) over indigenous stemborer species in Africa's changing climates:  
1468 ecological and thermal biology perspectives. *Agricultural and Forest Entomology*,  
1469 4, 344-356.

- 1470 Musolin DL, Tougou D, Fujisaki K 2010. Too hot to handle? Phenological and life-  
1471 history responses to simulated climate change of the southern stink bug *Nezara*  
1472 *viridula* (Heteroptera: Pentatoidae) *Global Change Biology*. 16, 73-87
- 1473 Musolin, D.L, Saulich, A.Kh. 2012. Responses of insects to the current climate  
1474 changes: from physiology and behavior to range shifts. *Entomological Review*. 92,  
1475 715-740
- 1476 Mäkelä, P.S.A., Tuulos, A., Turakainen, M., Santanen, A. and Stoddard, F.L. 2011.  
1477 Revitalizing the winter turnip rape crop in the northern latitudes. *Acta*  
1478 *Agricultururae Scandinavica Section B - Soil and Plant Science*. 61, 195-201.
- 1479 Netherer, S., Matthews, B., Katzensteiner, K., Blackwell, E., Henschke, P., Hietz, P.,  
1480 Pennerstorfer, J., Rosner, S., Kikuta, S., Schume, H., Schopf, A. 2015. "Do  
1481 water-limiting conditions predispose Norway spruce to bark beetle attack?" *New*  
1482 *Phytologist*. 205, 3, 1128-1141.
- 1483 Neuvonen, S., Niemelä, P. & Virtanen, T. 1999. Climatic change and insect  
1484 outbreaks in boreal forests: the role of winter temperatures. *Ecological Bulletins*.  
1485 47, 63-67.
- 1486 Newman JA, Gibson DJ, Parsons AJ, Thornley JHM 2003. How predictable are  
1487 aphid population responses to elevated CO<sub>2</sub>? *Journal of Animal Ecology*. 72,  
1488 556-566.
- 1489 Ngowi BV, Tonnang HEZ, Mwangi EM, Johansson T, Ambale J, Ndegwa PN,  
1490 Subramanian S. 2017. Temperature-dependent phenology of *Plutella xylostella*  
1491 (Lepidoptera: Plutellidae): Simulation and visualization of current and future  
1492 distributions along the Eastern Afromontane. *PLoS ONE*, 12, e0173590.
- 1493 Nguyen, C., Bahar, M.H., Baker, G., Andrew, N.R. 2014. Thermal tolerance limits of  
1494 diamondback moth in ramping and plunging assays. *PLoS ONE*. 9, 1, e87535.
- 1495 Nilsson, C. 1987. Yield losses in summer rape caused by pollen beetles (*Meligethes*  
1496 spp). *Swedish Journal of Agricultural Research*. 17, 105-111.
- 1497 Niziolek, O. K., M. R. Berenbaum, and E. H. DeLucia. 2013. Impact of elevated CO<sub>2</sub>  
1498 and increased temperature on Japanese beetle herbivory. *Insect Science*. 20,  
1499 513-523.
- 1500 O'Neal, M.J., Headrick, D.H., Montez, G.H., and Grafton-Cardwell, E.E., 2011.  
1501 Temperature Thresholds and Degree-Day Model for *Marmara gulosa*  
1502 (Lepidoptera: Gracillariidae) *Journal of Economic Entomology*. 104, 4, 1286-  
1503 1293.
- 1504 O'Neill, B. F., A. R. Zangerl, E. H. DeLucia, and M. R. Berenbaum. 2008. Longevity  
1505 and Fecundity of Japanese Beetle (*Popillia japonica*) on Foliage Grown Under  
1506 Elevated Carbon Dioxide. *Environmental Entomology*, 37, 601-607.

- 1507 Ong'amo, O. G., B. P. Le Ru, S. Dupas, P. Moyal, P.-A. Calatayud, and J. F.  
1508 Silvain. 2006. Distribution, pest status and agro-climatic preferences of  
1509 lepidopteran stem borers of maize in Kenya. *Annales de la Société*  
1510 *Entomologique de France* (n.s). 42, 171-177.
- 1511 Onstad, D.W., Brewer, E.F. 1996. Modeling Induction of Diapause in North  
1512 American *Ostrinia nubilalis* (Lepidoptera: Pyralidae) Populations. *Environmental*  
1513 *Entomology*. 25, 5, 1140-1146.
- 1514 Oswalt SN, Smith WB 2014. U.S. Forest resource facts and historical trends. The  
1515 United States Department of Agriculture, Publication FS-1035.
- 1516 Ouyang F et al. 2014. Weakening density dependence from climate change and  
1517 agricultural intensification triggers pest outbreaks: a 37-year observation of cotton  
1518 bollworms. *Ecology and Evolution*. 4, 3362-3374.
- 1519 Ouyang F, Hui C, Men X, Zhang Y, Fan L, Shi P, Zhao Z, Ge F. 2016. Early  
1520 eclosion of overwintering cotton bollworm moths from warming temperatures  
1521 accentuates yield loss in wheat. *Agriculture, Ecosystems and Environment*, 217,  
1522 89-98.
- 1523 Overholt, W. A. 2008. Displacement of native stem borers by *Chilo partellus*. Pages  
1524 1640-1641 in J. L. Capinera, editor. *Encyclopedia of Entomology* 2nd edition.  
1525 Springer
- 1526 Overholt, W., J. Songa, V. Ofomata, and J. Jeske. 2000. The spread and ecological  
1527 consequences of the invasion of *Chilo partellus* (Swinhoe) (Lepidoptera:  
1528 Crambidae) in Africa Pages 52-58 in E. Lyons and S. Miller, editors. *Invasive*  
1529 *Species in Eastern Africa: Proc. Workshop ICIPE, 2000*. ICIPE Sci. Press,  
1530 Nairobi.
- 1531 Økland, B. and O. N. Bjørnstad 2006. A resource depletion model of forest insect  
1532 outbreaks. *Ecology*. 87, 2, 283-290.
- 1533 Økland, B., Christiansen, E. & Wollebæk, G. 2009. Granbarkbillen. Registrering av  
1534 bestandsstørrelsene i 2009. Oppdragsrapport fra Skog og landskap 21/09: 14 s.
- 1535 Økland B, Krokene P, Lange H. 2012. Effects of climate change on the spruce bark  
1536 beetle. *ScienceNordic*. 1-5. <http://sciencenordic.com/effects-climate-change-spruce-bark-beetle>.
- 1538 Panizzi AR & Lucini T. 2016. What Happened to *Nezara viridula* (L.) in the  
1539 Americas? Possible Reasons to Explain Populations Decline. *Neotropical*  
1540 *Entomology*, 45, 619-628.
- 1541 Paradis, A., Elkington, J., Hayhoe, K., Buonaccorsi, J. 2008. Role of winter  
1542 temperature and climate change on the survival and future range expansion of

- 1543 the hemlock woolly adelgid (*Adelges tsugae*) in eastern North America. *Mitigation*  
1544 *and Adaptation Strategies for Global Change*. 13, 5, 541-554.
- 1545 Pereira, E.J.G., Picanço, M.C., Bacci, L., Crespo, a L.B., Guedes, R.N.C. 2007.  
1546 Seasonal mortality factors of the coffee leafminer, *Leucoptera coffeella*. *Bulletin*  
1547 *of Entomological Research*. 97, 4, 421-432.
- 1548 Peterson, A.T., Williams, R. & Chen, G. 2007. Modeled global invasive potential of  
1549 Asian gypsy moths *Lymantria dispar*. *Entomologia Experimentalis et Applicata*  
1550 125: 39-44.
- 1551 Pickett, J. A., M. W. Christine, C. A. Midega, Z. R. Khan. 2014. Push–pull farming  
1552 systems. *Current Opinion in Biotechnology*. 26, 125-132.
- 1553 Piironen S, Ketola T, Lyytinen A, Lindström L 2011. Energy use, diapause  
1554 behaviour and northern range expansion potential in the invasive Colorado potato  
1555 beetle. *Functional Ecology*. 25, 527-536.
- 1556 Ponti et al. 2014. Fine-scale ecological and economic assessment of climate  
1557 change on olive in the Mediterranean Basin reveals winners and losers. *PNAS*.  
1558 111, 15, 5598-5603.
- 1559 Potter, D. A., and D. W. Held. 2002. Biology and management of the Japanese  
1560 beetle. *Annual Review of Entomology*. 47, 175-205.
- 1561 Pouttu, A. & Annala, E. 2010. Kirjanpainajalla kaksi sukupolvea kesällä 2010.  
1562 *Metsätieteen aikakauskirja* 4/2010. 521-523.
- 1563 Pulatov B, Jönsson AM, Wilcke RAI, Linderson M, Hall K, Barring L. 2016.  
1564 Evaluation of the phenological synchrony between potato crop and Colorado  
1565 potato beetle under future climate in Europe. *Agriculture, Ecosystems and*  
1566 *Environment* 224, 39-49.
- 1567 Radin Z. 1990. Population dynamics of the European corn borer (*Ostrinia nubilalis*  
1568 Hbn.) in the north-west of Backa in the period 1979-1988. *Zastita Bilja*. 41, 151-  
1569 163.
- 1570 Raffa, K.F., Powell, E.N., Townsend, P.A. 2013. Temperature-driven range  
1571 expansion of an irruptive insect heightened by weakly coevolved plant defenses.  
1572 *PNAS*. 110, 6, 2193-2198.
- 1573 Rafoss, T., Saethre, M., 2003. Spatial and temporal distribution of bioclimatic  
1574 potetial for the Codling moth and the Colorado beetle in Normay: model  
1575 predictions versus climate and field data from the 1990s. *Agricultural and Forest*  
1576 *Meteorology*. 5, 75-85.
- 1577 Regniere, J., Nealis, V., Porter, K. 2009. Climate suitability and management of the  
1578 gypsy moth invasion into Canada. *Biological Invasions*. 11, 135-148.

- 1579 Régniere, J., St-Amant, R. & Duval, P. 2012. Predicting insect distributions under  
1580 climate change from physiological responses: spruce budworm as an example.  
1581 *Biological Invasions*. 14, 1571-1586.
- 1582 Robinet, C., Baier, P., Pennerstorfer, J., Schopf, A., and Roques, A. 2007. Modeling  
1583 the effects of climate change on the potential feeding activity of *Thaumetopoea*  
1584 *pityocampa* (Den. & Schiff.) (Lep. Notodontidae) in France. *Global Ecology and*  
1585 *Biogeography*. 16, 4, 460-471.
- 1586 Robinet, C., Imbert, C.-E., Rousset, J., Sauvard, D., Garcia, J., Goussard, F. and  
1587 Roques, A. 2012. Human-mediated long-distance jumps of the pine  
1588 processionary moth in Europe. *Biol Invasions*. 14, 1557-1569.
- 1589 Scheets, K. 2004. Maize chlorotic mottle. In: H. Lapierre and P.-A. Signoret (eds.)  
1590 *Viruses and virus diseases of Poaceae (Gramineae)*. Institut National de la  
1591 *Recherche Agronomique*, Paris.
- 1592 Scott, J.K., Yeoh, P.B. 1999. Bionomics and the predicted distribution of the aphid  
1593 *Brachycaudus rumexicolens* (Hemiptera: Aphididae). *Bulletin of Entomological*  
1594 *Research*, 89, 97-106.
- 1595 Sharma HC, Ortiz R. 2000. Transgenics, pest management, and the environment.  
1596 *Current Science*. 79, 421-437.
- 1597 Sheldeshova, G.G., 1967. Ecological factors determining distribution of the codling  
1598 moth, *Laspeyresia pomonella* L. (Lepidoptera: Tortricidae) in northern and  
1599 southern hemispheres. *Ent. Rev.* 46, 349-361.
- 1600 Shelton, A. M., J. L. Roberson, J. D. Tang, C. Perez, S. D. Eigenbrode, H. K.  
1601 Preisler, W. K. Wilsey, and R. J. Cooley. 1993. Resistance of diamondback moth  
1602 (Lepidoptera, Plutellidae) to *Bacillus thuringiensis* subspecies in the field. *J.*  
1603 *Econ. Entomol.* 86, 697-705.
- 1604 Showers WB 1981. Geographic variation of the diapause response in the European  
1605 corn borer. In: Denno RF and Dingle H, eds. *Insect Life History Patterns*. pp. 97-  
1606 111.
- 1607 Showers WB. 1993. Diversity and variation of European corn borer populations. In:  
1608 Kim KC and and McPheron BA, eds. *Evolution of Insect Pests: Patterns of*  
1609 *Variation*. Wiley and Sons, Inc., pp. 287-309.
- 1610 Shufran, K. A., L. R. Kirkman, and G. J. Puterka. 2007. Absence of mitochondrial  
1611 DNA sequence variation in Russian wheat aphid (Hemiptera: Aphididae)  
1612 populations consistent with a single introduction into the United States. *Journal of*  
1613 *the Kansas Entomological Society*. 80, 319-326.

- 1614 Smatas, R. Makunas, V., Brazauskiene, I. and Petraitiene, E. 2012. Sensitivity of  
1615 pollen beetle (*Meligethes aeneus* F.) to insecticides with different modes of action  
1616 and their efficacy in the field conditions. *Zemdirbyste-Agriculture*. 99, 197-202.
- 1617 Smith IM. 1999. Review of the status of glasshouse quarantine pests in EPPO  
1618 countries. *EPPO Bulletins*. 29, 91-93.
- 1619 Speiser B et al. 2013. Sustainability assessment of GM crops in Swiss agricultural  
1620 context. *Agronomy for Sustainable Development*. 33, 21-61.
- 1621 Stastny, M., Battisti, A., Petrucco-Toffolo, E., Schlyter, F. and Larsson, S. 2006.  
1622 Host-plant use in the range expansion of the pine processionary moth,  
1623 *Thaumetopoea pityocampa*. *Ecol. Entomol.* 31, 481-490.
- 1624 Stige LF, Chan K, Zhang Z, Frank D, Stenseth NC. 2007. Thousand-year-long  
1625 Chinese time series reveals climatic forcing of decadal locust dynamics. *PNAS*.  
1626 104, 16188-16193.
- 1627 Stoeckli, S., Hirschi, M., Spirig, C., Calanca, P., Rotach, M.W., Samietz, J., 2012.  
1628 Impact of climate change on voltinism and prospective diapause induction of a  
1629 global pest insect - *Cydia pomonella* (L.). *PLoS ONE*. 7, e35723.
- 1630 Strathdee AT, Howling GG, Bale JS 1995. Cold hardiness of overwintering aphid  
1631 eggs. *Journal of Insect Physiology*, 41, 653-657.
- 1632 Svensson BM, Carlsson BÅ, Melillo JM. 2018. Changes in species abundance after  
1633 seven years of elevated atmospheric CO<sub>2</sub> and warming in a Subarctic birch  
1634 forest understorey, as modified by rodent and moth outbreaks. *PeerJ*, 6, e4843.
- 1635 Svobodova E, Trnka M, Zalud Z, Semerádova D, Dubrovský M, Eitzinger J, Španek  
1636 P, Brazdil R. 2014. Climate variability and potential distribution of selected pest  
1637 species in south Moravia and northeast Austria in the past 200 years – lesson for  
1638 the future. *Journal of Agricultural Science*. 152, 225-237.
- 1639 Talekar, N.S. and Shelton, A.M., 1993. Biology, ecology, and management of the  
1640 diamondback moth *Annual Review of Entomology*. 38, 92, 275-301.
- 1641 Tamiru et al. 2012. Effect of temperature and relative humidity on the development  
1642 and fecundity of *Chilo partellus* (Swinhoe) (Lepidoptera: Crambidae). *Bulletin of*  
1643 *Entomological Research*, 102, 9-15.
- 1644 Tauber, M.J., Tauber, C.A. and Masaki, S. 1986. Seasonal adaptations of insects.  
1645 Oxford University Press, New York, USA.
- 1646 Tenow, O. 1972. The outbreaks of *Oporinia autumnata* Bkh. and *Operopthera* spp.  
1647 (Lep., Geometridae) in the Scandinavian mountain chain and Northern Finland  
1648 1862-1968. *Zoologiska Bidrag från Uppsala*. 2, 1-107.



- 1649 Tian et al. 2011. Reconstruction of a 1,910-y-long locust series reveals consistent  
1650 associations with climate fluctuations in China. PNAS. 108, 14521-14526.
- 1651 Tiilikainen, T.M. and Hokkanen, H.M.T. 2008. Pyrethroid resistance in Finnish pollen  
1652 beetle (*Meligethes aeneus*) populations - is it around the corner? EPPO Bulletin.  
1653 38, 99-103.
- 1654 Toigo, M, Barraquand, F, Barnagaud, JY, Piou, D, Jactel, H. 2017. Geographical  
1655 variation in climatic drivers of the pine processionary moth population dynamics.  
1656 Forest Ecology and Management, 404, 141-155.
- 1657 Tougou D, Musolin DL and Fujisaki, K 2009. Some like it hot! Rapid climate change  
1658 promotes changes in distribution ranges of *Nezara viridula* and *Nezara antennata* in  
1659 Japan Entomologia Experimentalis et Applicata. 130, 249-258
- 1660 Tran, J.K., Ylioja, T., Billings, R.F., Régnière, J., Ayres, M.P. 2007. Impact of  
1661 minimum winter temperatures on the population dynamics of *Dendroctonus*  
1662 *frontalis*. Ecological Applications. 17, 3, 882-899.
- 1663 Trnka M, Musk F, Semeradova D, Dubrovsky M, Kocmankova E, Xalud Z. 2007.  
1664 European corn borer life stage model: Regional estimates of pest development and  
1665 spatial distribution under present and future climate. Ecological Modeling. 207, 61-  
1666 84.
- 1667 Ulrichs, C., & K. R. Hopper. 2008. Predicting insect distributions from climate and  
1668 habitat data. BioControl. 53, 881-894.
- 1669 Ungerer, M.J., Ayres, M.P. & Lombardero, M.J. 1999. Climate and the northern  
1670 distribution limits of *Dendroctonus frontalis* Zimmermann (Coleoptera:  
1671 Scolytidae). Journal of Biogeography. 26, 1133-1145.
- 1672 Uvarov, B.P. 1936. The Oriental migratory locust (*Locusta migratoria manilensis*  
1673 Meyen, 1835). Bulletin of Entomological Research. 27, 91-104
- 1674 Valenzuela, I. 2008. A molecular analysis of aphids (Hemiptera: Aphididae) in  
1675 Southeastern Australia. Centre of Environmental Stress and Adaptation  
1676 Research (CESAR), University of Melbourne, Melbourne.
- 1677 Valosaari K-R., Aikio S. & Kaitala V. 2008. Spatial simulation model to predict the  
1678 Colorado potato beetle invasion under different management strategies. Ann.  
1679 Zool. Fennici. 45, 1-14.
- 1680 Vanhanen, H., Veteli, T.O., Päivinen, S., Kellomäki, S. & Niemelä, P. 2007. Climate  
1681 change and range shifts in two insect defoliators: gypsy moth and nun moth – a  
1682 model study. Silva Fennica. 41, 621-638.
- 1683 Vega, F.E., Rosenquist, E. & Collins, W., 2003. Global project needed to tackle  
1684 coffee crisis. Nature. 425, 343.

- 1685 Veromann, E., Tarang, T., Kevvää, R., Luik, A., & Williams, I. 2006. Insect pest and  
1686 their natural enemies on spring oilseed rape in Estonia: impact of cropping  
1687 systems. *Agricultural and Food Science*. 15, 61-72.
- 1688 Vega, F.E. & Hofstetter, R.W. 2015. *Bark Beetles: Biology and ecology of native*  
1689 *and invasive species*. Academic Press, London.
- 1690 Virtanen, T. & Neuvonen, S. 1999. Performance of moth larvae on birch in relation  
1691 to altitude, climate, host quality and parasitoids. *Oecologia*. 120, 92-101.
- 1692 Visser, M. E. & Holleman, L. J. M. 2001. Warmer springs disrupt the synchrony of  
1693 oak and winter moth phenology. *Proceedings of the Royal Society of London*  
1694 *Series B-Biological Sciences*. 268, 289-294.
- 1695 Wade RN, Karley AJ, Johnson SN, Hartley SE. 2017. Impact of predicted  
1696 precipitation scenarios on multitrophic interaction. *Functional Ecology*, 31, 1647-  
1697 1658.
- 1698 Wang C, Hawthorne D, Qin Y, Pan X, Li Z, Zhu S. 2017. Impact of climate and host  
1699 availability on future distribution of Colorado potato beetle. *Scientific Reports*, 7,  
1700 4489.
- 1701 Waterhouse, D.F. 1993. *The Major Arthropod Pests and Weeds of Agriculture in*  
1702 *Southeast Asia*. ACIAR Monograph No. 21. Canberra, Australia: Australian  
1703 Centre for International Agricultural Research, 141 pp.
- 1704 Way, M.J. 1994. A preliminary assessment of the effects of different constant  
1705 temperatures on the reproduction of *Eldana saccharina* (Lepidoptera: Pyralidae).  
1706 *Proceedings of the South African Sugar Technologists' Association*. 68, 16-18.
- 1707 Way, M.J., 1995. Developmental biology of the immature stages of *Eldana*  
1708 *saccharina* Walker (Lepidoptera: Pyralidae). *Proceedings of the South African*  
1709 *Sugar Technologists' Association*. 69, 83-86.
- 1710 Weed, A.S., Ayres, M.P. & Hicke, J.A. (2013) Consequences of climate change for  
1711 biotic disturbances in North American forests. *Ecological Monographs*. 83, 441-  
1712 470. Weed AS, Bentz BJ, Ayres MP, Holmes TP 2015. Geographically variable  
1713 response of *Dendroctonus ponderosae* to winter warming in the western United  
1714 States. *Landscape Ecology*. 30, 1075-1093.
- 1715 Wei, S.J. et al. (2013) Genetic structure and demographic history reveal migration of  
1716 the diamondback moth *Plutella xylostella* (Lepidoptera: Plutellidae) from the  
1717 southern to northern regions of China. *PLoS ONE*. 8, 4, e59654.
- 1718 Willett, M.J., Neven, L., Miller, C.E., 2009. The occurrence of codling moth in low  
1719 latitude countries: Validation of pest distribution reports. *Hort Technology*. 19,  
1720 633-637.

- 1721 Williams, D.W. & Liebhold, A.M. 1995. Herbivorous insects and global change:  
1722 potential changes in the spatial distribution of forest defoliator outbreaks. *Journal*  
1723 *of Biogeography*. 22, 665-671.
- 1724 Williams, D.W. & Liebhold, A.M. 2002. Climate change and the outbreak ranges of  
1725 two North American bark beetles. *Agricultural and Forest Entomology*. 4, 87-99.
- 1726 Williams, I., & Dixon, A. 2007. Life cycles and polymorphism. Pages 69-85 in H. Van  
1727 Emden and R. Harrington, editors. *Aphids as crop pests*. CABI Publishing,  
1728 Wallingford, Oxfordshire, UK.
- 1729 Xiao H, Chen J, Chen L, Chen C, Wu S. 2017. Exposure to mild temperatures  
1730 decreases overwintering larval survival and post-diapause reproductive potential  
1731 in the rice stem borer *Chilo suppressalis*. *Journal of Pest Science*, 90, 117-125.
- 1732 Yamamura, K., Yokozawa, M., Nishimori, M., Ueda, Y. & Yokosuka, T. 2006. How  
1733 to analyze long-term insect population dynamics under climate change: 50-year  
1734 data of three insect pests in paddy fields. *Population Ecology*. 48, 31-48.
- 1735 Zalucki, M.P. & Furlong, M.J. 2005. Forecasting *Helicoverpa* populations in  
1736 Australia: A comparison of regression based models and a bioclimatic based  
1737 modelling approach. *Insect Science*, 12, 45-56.
- 1738 Zalucki, M.P. & Furlong, M.J. 2011. Predicting outbreaks of a migratory pest: an  
1739 analysis of DBM distribution and abundance revisited, pp 8-14 In: Srinivasan, R.,  
1740 Shelton, A.M., Collins, H.L., eds. 2011. *Proceedings of the Sixth International*  
1741 *Workshop on Management of the Diamondback Moth and Other Crucifer Insect*  
1742 *Pests*, 21-25 March 2011, Kasetsart University, Nakhon Pathom, Thailand.  
1743 AVRDC – The World Vegetable Center, Publication No. 11-755. AVRDC – The  
1744 World Vegetable Center, Taiwan, 321 pp.
- 1745 Zalucki, M.P., Shabbir, A., Silva, R., et al. 2012. Estimating the Economic Cost of  
1746 One of the World's Major Insect Pests, *Plutella xylostella* (Lepidoptera:  
1747 *Plutellidae*): Just How Long Is a Piece of String? *Journal of Economic*  
1748 *Entomology*. 105, 1115-1129
- 1749 Zavala, J.A., Casteel, C.L., DeLucia, E.H. & Berenbaum, M.R. 2008. Anthropogenic  
1750 increase in carbon dioxide compromises plant defense against invasive insects.  
1751 *Proceedings of the National Academy of Sciences*. 105, 5129-5133.
- 1752 Zhang et al. 2009. Periodic temperature-associated drought/flood drives locust  
1753 plagues in China. *Proceedings of the Royal Society of London Series B-*  
1754 *Biological Sciences*. 276, 823-831.
- 1755 Zidon R, Tsueda H, Morin E, Morin S. 2016. Projecting pest population dynamics  
1756 under global warming: the combined effect of inter- and intra-annual variations.  
1757 *Ecological Applications*, 26, 1198-1210.
